# Supplementary material for: Enantioselective Hydroalkoxylation of 1,3-Dienes via Ni-Catalysis
Source: PubMed Central journal article supplement (PMC9951252; doi:10.1021/jacs.2c12779), 2023-02-10
Supplement: ja2c12779_si_001.pdf [file ja2c12779_si_001.pdf]

## Supporting Information For:

### Enantioselective Hydroalkoxylation of 1, 3-Dienes via Ni-catalysis

Qi Li,<sup>[a]</sup> Zhen Wang,<sup>[a]</sup> Vy M. Dong,<sup>\*[b]</sup> and Xiao-Hui Yang<sup>\*[a]</sup>

<sup>a</sup>*Advanced Research Institute of Multidisciplinary Science, School of Chemistry and Chemical Engineering, and Key Laboratory of Medical Molecule Science and Pharmaceutical Engineering, Ministry of Industry and Information Technology, Beijing Institute of Technology, Beijing 100081, P.R. China*

<sup>b</sup>*Department of Chemistry, University of California–Irvine, Irvine, California 92697, United States*

[xhyang@bit.edu.cn](mailto:xhyang@bit.edu.cn), [dongv@uci.edu](mailto:dongv@uci.edu)

#### Table of Contents

|                                                                      |            |
|----------------------------------------------------------------------|------------|
| <b>1. General.....</b>                                               | <b>S2</b>  |
| <b>2. Synthesis of product <i>rac</i>-3.....</b>                     | <b>S3</b>  |
| <b>3. General procedure for hydroalkoxylation of 1,3-dienes.....</b> | <b>S3</b>  |
| <b>4. Mechanistic studies.....</b>                                   | <b>S13</b> |
| 4.1. Acid/base additives for hydroalkoxylation.....                  | S13        |
| 4.2. Kinetic studies.....                                            | S14        |
| 4.3. NMR Monitoring.....                                             | S18        |
| 4.4. Electrospray MS (ESI-MS) analysis.....                          | S19        |
| 4.5. Initial rate <i>KIE</i> study.....                              | S20        |
| 4.6. Deuterium-labeling study.....                                   | S21        |
| 4.7. Diene geometry study.....                                       | S24        |
| 4.8. Cross-over studies.....                                         | S27        |
| 4.9. Reversibility study for branched 1,3-diene.....                 | S32        |
| <b>5. References.....</b>                                            | <b>S35</b> |
| <b>6. NMR spectra.....</b>                                           | <b>S37</b> |
| <b>7. HPLC spectra.....</b>                                          | <b>S62</b> |

## 1. General

Commercial reagents were purchased from LAAJOO, Bide Pharm, Tansoole or Acros Organics and without further purification. Benzyl alcohol was purified by distillation. All experiments were performed in oven-dried or flame-dried glassware. Reactions were monitored using either thin-layer chromatography (TLC) or gas chromatography (GC) using an Agilent Technologies 7890A GC system equipped with an Agilent Technologies 5975C inert XL EI/CI MSD. Visualization of the developed plates was performed under UV light (254 nm) or KMnO<sub>4</sub> stain. Organic solutions were concentrated under reduced pressure on a Heidolph rotary evaporator. Purification and isolation of products were performed via silica gel chromatography (both column and preparative thin-layer chromatography). Solvents were purchased from Tansoole. <sup>1</sup>H NMR, <sup>2</sup>H NMR and <sup>13</sup>C NMR spectra were recorded on Bruker Ascend 400M spectrometer. <sup>1</sup>H NMR spectra were internally referenced to the residual solvent signal or TMS. <sup>13</sup>C NMR spectra were internally referenced to the residual solvent signal. Data for <sup>1</sup>H NMR are reported as follows: chemical shift ( $\delta$  ppm), multiplicity (s = singlet, d = doublet, t = triplet, q = quartet, m = multiplet), coupling constant (Hz), integration. Data for <sup>2</sup>H NMR, <sup>13</sup>C NMR are reported in terms of chemical shift ( $\delta$  ppm). Infrared (IR) spectra were obtained on a Thermo IS5 spectrometer and are reported in terms of absorption frequency (cm<sup>-1</sup>). Enantiomeric ratio for enantioselective reactions were determined by a Shimadzu system High Performance Liquid Chromatography (HPLC) equipped with SPD-20A detector and LC-20AT pump. High resolution mass spectra (HRMS) were obtained on a Thermo LCQ Deca XP Maz mass spectrometer (ESI). 1,3-Dienes **2a-2k**, **2m**, and **2n** used here were known compounds and synthesized according to the reported literatures.<sup>1-3</sup>

## 2. Synthesis of product *rac-3*

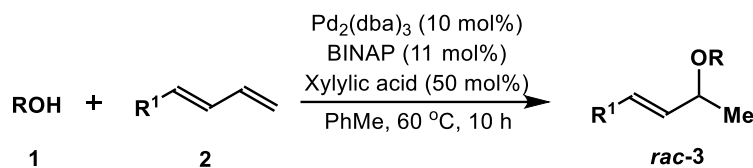

In a N<sub>2</sub>-filled glovebox, BINAP (6.8 mg, 0.011 mmol) and PhMe (0.2 mL) were added to a 1-dram vial containing Pd<sub>2</sub>(dba)<sub>3</sub> (4.6 mg, 0.005 mmol). The resulting mixture was stirred for 10 min and then Xylylic acid (7.5 mg, 0.05 mmol), diene **2** (0.10 mmol) and alcohol **1** (0.20 mmol) were added. The mixture was stirred at 60 °C for 10 h. The resulting solution was then cooled to rt. Products *rac-3* were obtained by column chromatography on silica gel or preparative thin-layer chromatography.

## 3. General procedure for hydroalkoxylation of 1,3-dienes

### Method A:

In a N<sub>2</sub>-filled glovebox, (*R, R*)-Me-DuPhos (6.7 mg, 0.022 mmol) and 1,3-diene **2** (0.6 mmol) were added to a 1-dram vial containing Ni(cod)<sub>2</sub> (5.6 mg, 0.02 mmol). The resulting mixture was stirred for 10 min and then alcohol **1** (0.2 mmol) was added. The mixture was removed from the glovebox and was held at 0 °C until no starting material was observed by TLC or GC-MS. The regioselectivities were determined by <sup>1</sup>H NMR analysis of the unpurified reaction mixture. Isolated yields (obtained by column chromatography on silica gel or preparative thin-layer chromatography) are reported.

### Method B:

In a N<sub>2</sub>-filled glovebox, (*R, R*)-Me-DuPhos (6.7 mg, 0.022 mmol) and <sup>t</sup>Pr<sub>2</sub>O (0.1 mL) were added to a 1-dram vial containing Ni(cod)<sub>2</sub> (5.6 mg, 0.02 mmol). The resulting mixture was stirred for 10 min and then 1,3-diene **2** (0.6 mmol) and alcohol **1** (0.2 mmol) were added. The mixture was held at 60 °C until no starting material was observed by TLC or GC-MS. The regioselectivities were determined by <sup>1</sup>H NMR analysis of the

unpurified reaction mixture. Isolated yields (obtained by column chromatography on silica gel or preparative thin-layer chromatography) are reported.

**(*S,E*)-(3-methoxybut-1-en-1-yl)benzene (3aa)<sup>4</sup>**

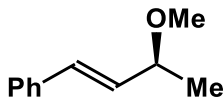 Method A (4 h), colorless oil, 95% yield, 96:4 *er*, >20:1 *rr*,  $[\alpha]_{\text{D}}^{28} = +88.93$  (c 0.52, CH<sub>2</sub>Cl<sub>2</sub>). <sup>1</sup>H NMR (400 MHz, CDCl<sub>3</sub>)  $\delta$  7.36 – 7.29 (m, 2H), 7.28 – 7.21 (m, 2H), 7.20 – 7.12 (m, 1H), 6.46 (d, *J* = 16.0 Hz, 1H), 6.02 (dd, *J* = 16.0, 7.6 Hz, 1H), 3.86 – 3.77 (m, 1H), 3.25 (s, 3H), 1.26 (d, *J* = 6.4 Hz, 3H). <sup>13</sup>C NMR (101 MHz, CDCl<sub>3</sub>)  $\delta$  136.8, 131.6, 131.5, 128.7, 127.8, 126.6, 78.3, 56.2, 21.7. HPLC: chiral stationary column OJ-H, mobile phase hexane/<sup>i</sup>PrOH = 99/1, 1.0 mL/min, 254 nm, 30 °C, *t*<sub>R</sub> (minor) = 6.9 min, *t*<sub>R</sub> (major) = 7.4 min.

**(*S,E*)-1-methoxy-4-(3-methoxybut-1-en-1-yl)benzene (3ba)<sup>5</sup>**

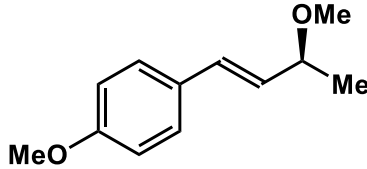 Method A (45 °C, 15 min), light yellow oil, 73% yield, 90:10 *er*, >20:1 *rr*,  $[\alpha]_{\text{D}}^{28} = +9.30$  (c 0.17., CH<sub>2</sub>Cl<sub>2</sub>). <sup>1</sup>H NMR (400 MHz, CDCl<sub>3</sub>)  $\delta$  7.33 (d, *J* = 8.7 Hz, 2H), 6.86 (d, *J* = 8.7 Hz, 2H), 6.48 (d, *J* = 15.9 Hz, 1H), 5.95 (dd, *J* = 15.9, 7.7 Hz, 1H), 3.91 – 3.83 (m, 1H), 3.81 (s, 3H), 3.31 (s, 3H), 1.33 (d, *J* = 6.3 Hz, 3H). <sup>13</sup>C NMR (101 MHz, CDCl<sub>3</sub>)  $\delta$  159.4, 131.1, 129.6, 129.4, 127.8, 114.2, 78.4, 56.1, 55.4, 21.7. HPLC: chiral stationary column AD-H, mobile phase hexane/<sup>i</sup>PrOH = 99/1, 1.0 mL/min, 254 nm, 30 °C, *t*<sub>R</sub> (minor) = 7.2 min, *t*<sub>R</sub> (major) = 7.9 min.

**(*S,E*)-1-(3-methoxybut-1-en-1-yl)-4-methylbenzene (3ca)<sup>5</sup>**

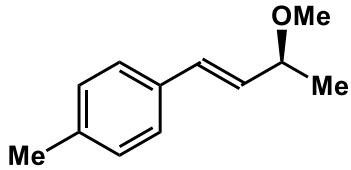 Method A (10 °C, 1 h), colorless oil, 85% yield, 95:5 *er*, >20:1 *rr*,  $[\alpha]_{\text{D}}^{28} = +84.54$  (c 0.49, CH<sub>2</sub>Cl<sub>2</sub>). <sup>1</sup>H NMR (400 MHz, CDCl<sub>3</sub>)  $\delta$  7.30 (d, *J* = 8.0 Hz, 2H), 7.14 (d, *J* = 7.9 Hz, 2H), 6.51 (d, *J* = 15.9 Hz, 1H), 6.05 (dd, *J* = 15.9, 7.7 Hz, 1H), 3.93 – 3.84 (m, 1H), 3.32 (s, 3H), 2.35 (s, 3H), 1.34 (d, *J* = 6.3 Hz, 3H). <sup>13</sup>C NMR (101 MHz, CDCl<sub>3</sub>)  $\delta$  137.7, 134.0, 131.5, 130.6, 129.4, 126.5, 78.4, 56.2, 21.7, 21.4. HPLC: chiral

stationary column OJ-H, mobile phase hexane/*i*PrOH = 99/1, 1.0 mL/min, 254 nm, 30 °C,  $t_R$  (minor) = 7.7 min,  $t_R$  (major) = 8.4 min.

**(*S,E*)-1-fluoro-4-(3-methoxybut-1-en-1-yl)benzene (3da)<sup>6</sup>**

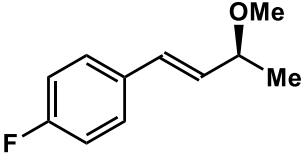 Method A (2 h), colorless oil, 91% yield, 95:5 *er*, >20:1 *rr*,  $[\alpha]_D^{28} = +66.92$  (c 0.52, CH<sub>2</sub>Cl<sub>2</sub>). **<sup>1</sup>H NMR** (400 MHz, CDCl<sub>3</sub>)  $\delta$  7.41 – 7.30 (m, 2H), 7.06 – 6.95 (m, 2H), 6.49 (d,  $J = 16.0$  Hz, 1H), 6.01 (dd,  $J = 15.9, 7.6$  Hz, 1H), 3.92 – 3.83 (m, 1H), 3.32 (s, 3H), 1.33 (d,  $J = 6.4$  Hz, 3H). **<sup>13</sup>C NMR** (101 MHz, CDCl<sub>3</sub>)  $\delta$  162.5 (d,  $J = 247.5$  Hz), 133.0 (d,  $J = 3.0$  Hz), 131.4 (d,  $J = 2.0$  Hz), 130.3, 128.1 (d,  $J = 8.1$  Hz), 115.6 (d,  $J = 21.2$  Hz), 78.2, 56.2, 21.6. **<sup>19</sup>F NMR** (376 MHz, CDCl<sub>3</sub>)  $\delta$  -114.5. **HPLC**: chiral stationary column OJ-H, mobile phase hexane/*i*PrOH = 99/1, 1.0 mL/min, 254 nm, 30 °C,  $t_R$  (minor) = 7.0 min,  $t_R$  (major) = 7.5 min.

**(*S,E*)-1-chloro-4-(3-methoxybut-1-en-1-yl)benzene (3ea)<sup>5</sup>**

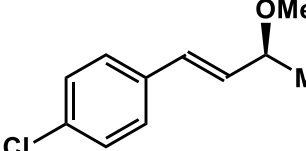 Method A (10 °C 1.5 h), colorless oil, 66% yield, 92:8 *er*, >20:1 *rr*,  $[\alpha]_D^{28} = +59.22$  (c 0.39, CH<sub>2</sub>Cl<sub>2</sub>). **<sup>1</sup>H NMR** (400 MHz, CDCl<sub>3</sub>)  $\delta$  7.27 – 7.17 (m, 4H), 6.41 (d,  $J = 16.0$  Hz, 1H), 6.00 (dd,  $J = 16.0, 7.5$  Hz, 1H), 3.86 – 3.77 (m, 1H), 3.25 (s, 3H), 1.25 (d,  $J = 6.4$  Hz, 3H). **<sup>13</sup>C NMR** (101 MHz, CDCl<sub>3</sub>)  $\delta$  135.4, 133.4, 132.4, 130.2, 128.9, 127.8, 78.1, 56.3, 21.5. **HPLC**: chiral stationary column OJ-H, mobile phase hexane/*i*PrOH = 99.8/0.2, 1.5 mL/min, 254 nm, 30 °C,  $t_R$  (minor) = 6.8 min,  $t_R$  (major) = 7.1 min.

**(*S,E*)-4-(3-methoxybut-1-en-1-yl)-*N,N*-dimethylaniline (3fa)**

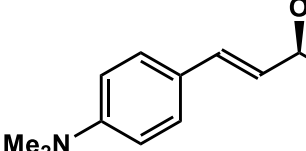 Method A (60 °C, 3 h), colorless oil, 73% yield, 81:19 *er*, >20:1 *rr*,  $[\alpha]_D^{28} = +75.05$  (c 0.49, CH<sub>2</sub>Cl<sub>2</sub>). **<sup>1</sup>H NMR** (400 MHz, CDCl<sub>3</sub>)  $\delta$  7.21 (d,  $J = 8.8$  Hz, 2H), 6.61 (d,  $J = 8.8$  Hz, 2H), 6.36 (d,  $J = 15.9$  Hz, 1H), 5.79 (dd,  $J = 15.9, 7.9$  Hz, 1H), 3.82 – 3.73 (m, 1H), 3.22 (s, 3H), 2.88 (s, 6H), 1.24 (d,  $J = 6.3$  Hz, 3H). **<sup>13</sup>C NMR** (101 MHz, CDCl<sub>3</sub>)  $\delta$  150.3, 131.8, 127.7, 127.6, 127.3, 112.7, 78.7, 56.0, 40.7, 21.9. **IR** (neat):

2972, 2926, 2816, 1609, 1353, 1109, 967, 807  $\text{cm}^{-1}$ . **HRMS** calculated for  $\text{C}_{13}\text{H}_{20}\text{NO}$   $[\text{M}+\text{H}]^+$  206.1545, found 206.1540. **HPLC**: chiral stationary column OJ-H, mobile phase hexane/ $i$ PrOH = 90/10, 1.0 mL/min, 254 nm, 30  $^{\circ}\text{C}$ ,  $t_{\text{R}}$  (minor) = 12.1 min,  $t_{\text{R}}$  (major) = 13.9 min.

**(*S,E*)-1-(3-methoxybut-1-en-1-yl)-3-methylbenzene (3ga)**

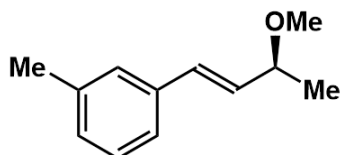

Method A (5 h), colorless oil, 92% yield, 96:4 *er*, >20:1 *rr*,  $[\alpha]_{\text{D}}^{28} = +87.64$  (c 0.45,  $\text{CH}_2\text{Cl}_2$ ).  **$^1\text{H NMR}$**  (400 MHz,  $\text{CDCl}_3$ )  $\delta$  7.21 (d,  $J = 6.6$  Hz, 3H), 7.08 – 7.04 (m, 1H), 6.51 (d,  $J = 15.9$  Hz, 1H), 6.08 (dd,  $J = 15.9, 7.6$  Hz, 1H), 3.93 – 3.84 (m, 1H), 3.32 (s, 3H), 2.35 (s, 3H), 1.33 (d,  $J = 6.3$  Hz, 3H).  **$^{13}\text{C NMR}$**  (101 MHz,  $\text{CDCl}_3$ )  $\delta$  138.3, 136.8, 131.7, 131.5, 128.7, 128.6, 127.4, 123.8, 78.3, 56.2, 21.7, 21.6. **IR** (neat): 3024, 2975, 2926, 1448, 1082, 967, 777, 693  $\text{cm}^{-1}$ . **HRMS** calculated for  $\text{C}_{12}\text{H}_{17}\text{O}$   $[\text{M}+\text{H}]^+$  177.1279, found 177.1273. **HPLC**: chiral stationary column OJ-H, mobile phase hexane/ $i$ PrOH = 99/1, 1.0 mL/min, 254 nm, 30  $^{\circ}\text{C}$ ,  $t_{\text{R}}$  (minor) = 6.3 min,  $t_{\text{R}}$  (major) = 6.7 min.

**(*S,E*)-1-methoxy-2-(3-methoxybut-1-en-1-yl)benzene (3ha)<sup>5</sup>**

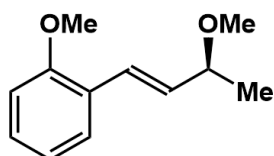

Method A (5 h), colorless oil, 94% yield, 95:5 *er*, >20:1 *rr*,  $[\alpha]_{\text{D}}^{28} = +66.67$  (c 0.51,  $\text{CH}_2\text{Cl}_2$ ).  **$^1\text{H NMR}$**  (400 MHz,  $\text{CDCl}_3$ )  $\delta$  7.42 – 7.35 (m, 1H), 7.19 – 7.10 (m, 1H), 6.88 – 6.73 (m, 3H), 6.02 (dd,  $J = 16.1, 7.8$  Hz, 1H), 3.86 – 3.78 (m, 1H), 3.77 (s, 3H), 3.24 (s, 3H), 1.25 (d,  $J = 6.3$  Hz, 3H).  **$^{13}\text{C NMR}$**  (101 MHz,  $\text{CDCl}_3$ )  $\delta$  156.9, 132.1, 128.8, 127.0, 126.4, 125.8, 120.8, 111.1, 78.8, 56.1, 55.6, 21.8. **HPLC**: chiral stationary column AD-H, mobile phase hexane/ $i$ PrOH = 99.5/0.5, 1.0 mL/min, 254 nm, 30  $^{\circ}\text{C}$ ,  $t_{\text{R}}$  (minor) = 7.4 min,  $t_{\text{R}}$  (major) = 9.6 min.

**(*S,E*)-2-(3-methoxybut-1-en-1-yl)furan (3ia)**

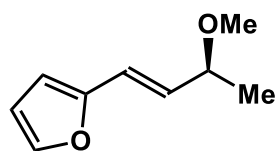

Method A (2 h), light yellow oil, 92% yield, 95:5 *er*, >20:1 *rr*,

$[\alpha]_D^{28} = +93.47$  (c 0.51, CH<sub>2</sub>Cl<sub>2</sub>). <sup>1</sup>H NMR (400 MHz, CDCl<sub>3</sub>)

$\delta$  7.38 – 7.30 (m, 1H), 6.41 – 6.31 (m, 2H), 6.24 (d, *J* = 3.2 Hz,

1H), 6.04 (dd, *J* = 15.9, 7.4 Hz, 1H), 3.89 – 3.81 (m, 1H), 3.31 (s, 3H), 1.31 (d, *J* = 6.4

Hz, 3H). <sup>13</sup>C NMR (101 MHz, CDCl<sub>3</sub>)  $\delta$  152.5, 142.1, 130.3, 119.7, 111.4, 108.1, 77.9,

56.3, 21.6. IR (neat): 2969, 2926, 2853, 1247, 1013, 962, 732 cm<sup>-1</sup>. HRMS calculated

for C<sub>9</sub>H<sub>13</sub>O<sub>2</sub> [M+H]<sup>+</sup> 153.0916, found 153.0910. HPLC: chiral stationary column OJ-

H, mobile phase hexane/<sup>i</sup>PrOH = 99/1, 1.0 mL/min, 254 nm, 30 °C, *t<sub>R</sub>* (minor) = 6.6

min, *t<sub>R</sub>* (major) = 7.4 min.

### (*S,E*)-2-(3-methoxybut-1-en-1-yl)thiophene (3ja)

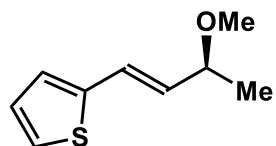

Method A (2 h), light yellow oil, 65% yield, 93:7 *er*, >20:1 *rr*,

$[\alpha]_D^{28} = +38.37$  (c 0.32, CH<sub>2</sub>Cl<sub>2</sub>). <sup>1</sup>H NMR (400 MHz, CDCl<sub>3</sub>)

$\delta$  7.20 – 7.12 (m, 1H), 7.00 – 6.92 (m, 2H), 6.66 (d, *J* = 15.8 Hz,

1H), 5.94 (dd, *J* = 15.8, 7.5 Hz, 1H), 3.90 – 3.80 (m, 1H), 3.32 (s, 3H), 1.32 (d, *J* = 6.4

Hz, 3H). <sup>13</sup>C NMR (101 MHz, CDCl<sub>3</sub>)  $\delta$  142.0, 131.3, 127.5, 125.9, 124.6, 124.5, 78.0,

56.3, 21.5. IR (neat): 2974, 2926, 2853, 1458, 1109, 957, 696 cm<sup>-1</sup>. HRMS calculated

for C<sub>9</sub>H<sub>13</sub>OS [M+H]<sup>+</sup> 169.0687, found 169.0681. HPLC: chiral stationary column OJ-

H, mobile phase hexane/<sup>i</sup>PrOH = 99/1, 1.0 mL/min, 254 nm, 30 °C, *t<sub>R</sub>* (minor) = 6.7

min, *t<sub>R</sub>* (major) = 7.4 min.

### (*S,E*)-4-(((4-cyclohexylbut-3-en-2-yl)oxy)methyl)-1,1'-biphenyl (3ka)

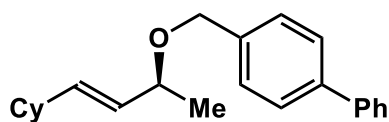

Method B (1 h), colorless oil, 31% yield, 88:12

*er*, >20:1 *rr*,  $[\alpha]_D^{28} = +32.73$  (c 0.22, CH<sub>2</sub>Cl<sub>2</sub>). <sup>1</sup>H

NMR (400 MHz, CDCl<sub>3</sub>)  $\delta$  7.62 – 7.55 (m, 4H), 7.47

– 7.38 (m, 4H), 7.37 – 7.31 (m, 1H), 5.59 (dd, *J* = 15.6, 6.6 Hz, 1H), 5.35 (dd, *J* = 15.6,

6.6 Hz, 1H), 4.59 (d, *J* = 12.0 Hz, 1H), 4.41 (d, *J* = 12.0 Hz, 1H), 3.94 – 3.85 (m, 1H),

2.05 – 1.95 (m, 1H), 1.82 – 1.70 (m, 5H), 1.35 – 1.07 (m, 8H). <sup>13</sup>C NMR (101 MHz,

CDCl<sub>3</sub>)  $\delta$  141.3, 140.5, 139.5, 138.3, 129.3, 128.9, 128.4, 127.4, 127.3, 76.3, 69.5, 40.5,

33.2, 33.1, 26.4, 26.2, 22.1. IR (neat): 3028, 2971, 2924, 2851, 1448, 1074, 971, 823,

759, 697  $\text{cm}^{-1}$ . **HRMS** calculated for  $\text{C}_{23}\text{H}_{29}\text{O}$   $[\text{M}+\text{H}]^+$  321.2218, found 321.2214.

**HPLC**: chiral stationary column OJ-H, mobile phase hexane/*i*PrOH = 90/10, 1.0 mL/min, 254 nm, 30 °C,  $t_{\text{R}}$  (major) = 5.3 min,  $t_{\text{R}}$  (minor) = 5.8 min.

**(S)-4-((but-3-en-2-yloxy)methyl)-1,1'-biphenyl (3la)**<sup>7</sup>

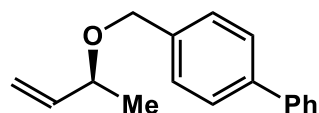

Method B (butadiene (10 eq.) is in hexane (20%), 20 min), colorless oil, 48% yield, 80:20 *er*, >20:1 *rr*,  $[\alpha]_{\text{D}}^{28} = +11.74$  (c 0.46,  $\text{CH}_2\text{Cl}_2$ ). **<sup>1</sup>H NMR** (400 MHz,  $\text{CDCl}_3$ )  $\delta$  7.59 (t,  $J = 7.3$  Hz, 4H), 7.49 – 7.40 (m, 4H), 7.35 (t,  $J = 7.3$  Hz, 1H), 5.89 – 5.77 (m, 1H), 5.29 – 5.18 (m, 2H), 4.63 (d,  $J = 11.9$  Hz, 1H), 4.45 (d,  $J = 11.9$  Hz, 1H), 4.03 – 3.92 (m, 1H), 1.33 (d,  $J = 6.4$  Hz, 3H). **<sup>13</sup>C NMR** (101 MHz,  $\text{CDCl}_3$ )  $\delta$  141.2, 140.6, 140.4, 138.0, 128.9, 128.3, 127.4, 127.31, 127.27, 116.4, 76.5, 69.9, 21.6. **HPLC**: chiral stationary column OJ-H, mobile phase hexane/*i*PrOH = 98/2, 1.0 mL/min, 254 nm, 30 °C,  $t_{\text{R}}$  (major) = 10.8 min,  $t_{\text{R}}$  (minor) = 11.5 min.

**(S)-(3-methoxybut-1-en-2-yl)benzene (3ma)**<sup>8</sup>

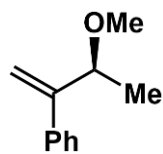

Method A (30 °C, 3 h), colorless oil, 77% yield, 62:38 *er*, >20:1 *rr*,  $[\alpha]_{\text{D}}^{15} = +10.00$  (c 0.16,  $\text{CH}_2\text{Cl}_2$ ). **<sup>1</sup>H NMR** (400 MHz,  $\text{CDCl}_3$ )  $\delta$  7.37 – 7.31 (m, 2H), 7.29 – 7.16 (m, 3H), 5.29 (s, 1H), 5.21 (s, 1H), 4.12 (q,  $J = 6.2$  Hz, 1H), 3.31 (s, 3H), 1.20 (d,  $J = 6.5$  Hz, 3H). **<sup>13</sup>C NMR** (101 MHz,  $\text{CDCl}_3$ )  $\delta$  149.5, 140.1, 128.4, 127.7, 127.1, 114.2, 80.2, 56.4, 21.3. **HPLC**: chiral stationary column OJ-H, mobile phase hexane/*i*PrOH = 90/10, 1.0 mL/min, 254 nm, 30 °C,  $t_{\text{R}}$  (minor) = 5.1 min,  $t_{\text{R}}$  (major) = 5.5 min.

**(S,E)-(3-ethoxybut-1-en-1-yl)benzene (3ab)**<sup>5</sup>

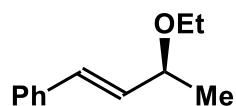

Method A (4 h), colorless oil, 79% yield, 95:5 *er*, >20:1 *rr*,  $[\alpha]_{\text{D}}^{28} = +77.08$  (c 0.48,  $\text{CH}_2\text{Cl}_2$ ). **<sup>1</sup>H NMR** (400 MHz,  $\text{CDCl}_3$ )  $\delta$  7.36 – 7.28 (m, 2H), 7.28 – 7.20 (m, 2H), 7.20 – 7.12 (m, 1H), 6.44 (d,  $J = 16.0$  Hz, 1H), 6.05 (dd,  $J = 16.0, 7.6$  Hz, 1H), 3.93 (m, 1H), 3.55 – 3.44 (m, 1H), 3.39 – 3.29 (m, 1H), 1.26 (d,  $J = 6.4$  Hz, 3H), 1.14 (t,  $J = 7.0$  Hz, 3H). **<sup>13</sup>C NMR** (101 MHz,  $\text{CDCl}_3$ )  $\delta$  136.9,



132.3, 131.0, 128.7, 127.7, 126.6, 76.5, 63.8, 21.9, 15.6. **HPLC**: chiral stationary column OJ-H, mobile phase hexane/<sup>i</sup>PrOH = 99/1, 1.0 mL/min, 254 nm, 30 °C,  $t_R$  (minor) = 5.6 min,  $t_R$  (major) = 6.6 min.

**(*S,E*)-(3-(benzyloxy)but-1-en-1-yl)benzene (3ac)**<sup>9</sup>

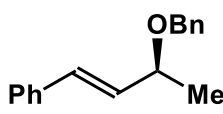 Method A (3 h), colorless oil, 90% yield, 92:8 *er*, >20:1 *rr*,  $[\alpha]_D^{32} = +53.71$  (c 0.35, toluene). **<sup>1</sup>H NMR** (400 MHz, CDCl<sub>3</sub>)  $\delta$  7.46 – 7.39 (m, 2H), 7.39 – 7.31 (m, 6H), 7.30 – 7.22 (m, 2H), 6.55 (d,  $J = 16.0$  Hz, 1H), 6.17 (dd,  $J = 16.0, 7.7$  Hz, 1H), 4.62 (d,  $J = 12.0$  Hz, 1H), 4.45 (d,  $J = 12.0$  Hz, 1H), 4.16 – 4.07 (m, 1H), 1.39 (d,  $J = 6.4$  Hz, 3H). **<sup>13</sup>C NMR** (101 MHz, CDCl<sub>3</sub>)  $\delta$  139.0, 136.8, 131.9, 131.6, 128.8, 128.6, 127.9, 127.6, 126.7, 76.0, 70.2, 22.0. **HPLC**: chiral stationary column OJ-H, mobile phase hexane/<sup>i</sup>PrOH = 90/10, 1.0 mL/min, 254 nm, 30 °C,  $t_R$  (minor) = 6.8 min,  $t_R$  (major) = 7.9 min.

**(*S,E*)-(3-((4-phenylbut-3-en-2-yl)oxy)propyl)benzene (3ad)**<sup>10</sup>

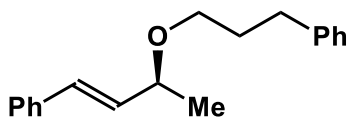 Method A (4 h), colorless oil, 75% yield, 94:6 *er*, >20:1 *rr*,  $[\alpha]_D^{28} = +87.01$  (c 0.49, CH<sub>2</sub>Cl<sub>2</sub>). **<sup>1</sup>H NMR** (400 MHz, CDCl<sub>3</sub>)  $\delta$  7.33 – 7.27 (m, 2H), 7.23 (t,  $J = 7.5$  Hz, 2H), 7.20 – 7.05 (m, 6H), 6.42 (d,  $J = 16.0$  Hz, 1H), 6.04 (dd,  $J = 16.0, 7.5$  Hz, 1H), 3.94 – 3.85 (m, 1H), 3.49 – 3.39 (m, 1H), 3.34 – 3.23 (m, 1H), 2.69 – 2.54 (m, 2H), 1.88 – 1.77 (m, 2H), 1.26 (d,  $J = 6.4$  Hz, 3H). **<sup>13</sup>C NMR** (101 MHz, CDCl<sub>3</sub>)  $\delta$  142.2, 136.9, 132.3, 131.0, 128.72, 128.65, 128.4, 127.7, 126.6, 125.9, 76.7, 67.6, 32.6, 31.7, 21.9. **HPLC**: chiral stationary column OJ-H, mobile phase hexane/<sup>i</sup>PrOH = 90/10, 1.0 mL/min, 254 nm, 30 °C,  $t_R$  (minor) = 6.5 min,  $t_R$  (major) = 7.7 min.

**(*S,E*)-(3-(3-chloropropoxy)but-1-en-1-yl)benzene (3ae)**

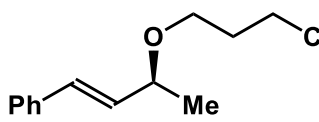 Method A (8 h), colorless oil, 92% yield, 92:8 *er*, >20:1 *rr*,  $[\alpha]_D^{28} = +92.44$  (c 0.23, CH<sub>2</sub>Cl<sub>2</sub>). **<sup>1</sup>H NMR** (400 MHz, CDCl<sub>3</sub>)  $\delta$  7.32 (d,  $J = 7.3$  Hz, 2H), 7.25 (t,  $J = 7.5$  Hz, 2H), 7.21 – 7.14 (m, 1H), 6.45 (d,  $J = 16.0$  Hz, 1H), 6.03 (dd,  $J = 16.0, 7.5$  Hz, 1H), 3.98 – 3.89 (m, 1H), 3.64 – 3.53

(m, 3H), 3.46 – 3.38 (m, 1H), 2.00 – 1.90 (m, 2H), 1.26 (d,  $J = 6.4$  Hz, 3H).  $^{13}\text{C}$  NMR (101 MHz,  $\text{CDCl}_3$ )  $\delta$  136.8, 131.9, 131.2, 128.8, 127.8, 126.6, 77.0, 64.8, 42.3, 33.1, 21.8. **IR** (neat): 2026, 2972, 2927, 2866, 1448, 1099, 966, 749, 694  $\text{cm}^{-1}$ . **HRMS** calculated for  $\text{C}_{13}\text{H}_{18}\text{ClO}$   $[\text{M}+\text{H}]^+$  225.1046, found 225.1043. **HPLC**: chiral stationary column AS-H, mobile phase hexane/ $i$ PrOH = 99/1, 1.0 mL/min, 254 nm, 30 °C,  $t_{\text{R}}$  (minor) = 4.0 min,  $t_{\text{R}}$  (major) = 5.7 min.

**(*S,E*)-trimethyl(3-((4-phenylbut-3-en-2-yl)oxy)propyl)silane (3af)**

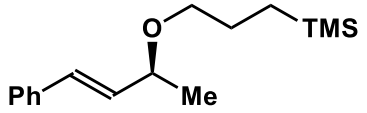 Method A (4 h), colorless oil, 60% yield, 96:4 *er*, >20:1 *rr*,  $[\alpha]_{\text{D}}^{28} = +65.53$  (c 0.47,  $\text{CH}_2\text{Cl}_2$ ).  $^1\text{H}$  NMR (400 MHz,  $\text{CDCl}_3$ )  $\delta$  7.46 – 7.38 (m, 2H), 7.33 (t,  $J = 7.5$  Hz, 2H), 7.29 – 7.21 (m, 1H), 6.53 (d,  $J = 16.0$  Hz, 1H), 6.14 (dd,  $J = 15.9, 7.5$  Hz, 1H), 4.06 – 3.95 (m, 1H), 3.52 – 3.43 (m, 1H), 3.37 – 3.27 (m, 1H), 1.65 – 1.55 (m, 2H), 1.35 (d,  $J = 6.4$  Hz, 3H), 0.53 – 0.44 (m, 2H), 0.00 (s, 9H).  $^{13}\text{C}$  NMR (101 MHz,  $\text{CDCl}_3$ )  $\delta$  136.9, 132.4, 130.9, 128.7, 127.7, 126.6, 76.6, 71.7, 24.6, 21.9, 12.8, -1.55. **IR** (neat): 3027, 2952, 2928, 2870, 1093, 966, 858, 748, 692  $\text{cm}^{-1}$ . **HRMS** calculated for  $\text{C}_{16}\text{H}_{27}\text{OSi}$   $[\text{M}+\text{H}]^+$  263.1831, found 263.1826. **HPLC**: chiral stationary column OJ-H, mobile phase hexane/ $i$ PrOH = 99.8/0.2, 1.5 mL/min, 254 nm, 30 °C,  $t_{\text{R}}$  (minor) = 3.2 min,  $t_{\text{R}}$  (major) = 3.4 min.

**(*S,E*)-3-(cinnamyloxy)but-1-en-1-yl)benzene (3ag)**

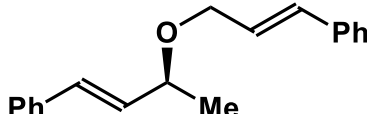 Method A (5 h), colorless oil, 72% yield, 95:5 *er*, >20:1 *rr*,  $[\alpha]_{\text{D}}^{28} = +100.00$  (c 0.45,  $\text{CH}_2\text{Cl}_2$ ).  $^1\text{H}$  NMR (400 MHz,  $\text{CDCl}_3$ )  $\delta$  7.35 – 7.28 (m, 4H), 7.28 – 7.20 (m, 4H), 7.19 – 7.12 (m, 2H), 5.56 – 6.43 (m, 2H), 6.28 – 6.18 (m, 1H), 6.07 (dd,  $J = 16.0, 7.7$  Hz, 1H), 4.19 – 4.12 (m, 1H), 4.09 – 3.96 (m, 2H), 1.31 (d,  $J = 6.4$  Hz, 3H).  $^{13}\text{C}$  NMR (101 MHz,  $\text{CDCl}_3$ )  $\delta$  137.0, 136.8, 132.3, 131.8, 131.6, 128.8, 128.7, 127.9, 127.7, 126.6, 76.1, 69.0, 21.9. **IR** (neat): 3026, 2974, 2927, 1072, 966, 748, 692  $\text{cm}^{-1}$ . **HRMS** calculated for  $\text{C}_{19}\text{H}_{21}\text{O}$   $[\text{M}+\text{H}]^+$  265.1592, found 265.1588. **HPLC**: chiral stationary column OJ-H, mobile phase hexane/ $i$ PrOH = 90/10, 1 mL/min, 254 nm, 30 °C,  $t_{\text{R}}$  (minor) = 12.0 min,  $t_{\text{R}}$  (major) = 13.6 min.

**(*S,E*)-1-fluoro-4-(((4-phenylbut-3-en-2-yl)oxy)methyl)benzene (3ah)**

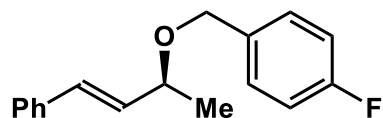

Method A (4 h), colorless oil, 95% yield, 91:9 *er*, >20:1 *rr*,  $[\alpha]_{\text{D}}^{28} = +96.30$  (c 0.54, CH<sub>2</sub>Cl<sub>2</sub>). **<sup>1</sup>H NMR** (400 MHz, CDCl<sub>3</sub>)  $\delta$  7.37 – 7.30 (m, 2H), 7.29 – 7.21 (m, 4H), 7.21 – 7.14 (m, 1H), 6.95 (t, *J* = 8.7 Hz, 2H), 6.47 (d, *J* = 16.0 Hz, 1H), 6.08 (dd, *J* = 16.0, 7.7 Hz, 1H), 4.49 (d, *J* = 11.8 Hz, 1H), 4.32 (d, *J* = 11.8 Hz, 1H), 4.06 – 3.96 (m, 1H), 1.30 (d, *J* = 6.4 Hz, 3H). **<sup>13</sup>C NMR** (101 MHz, CDCl<sub>3</sub>)  $\delta$  162.43 (d, *J* = 245.4 Hz), 136.8, 134.7 (d, *J* = 3.0 Hz), 131.7, 129.6 (d, *J* = 8.1 Hz), 128.8, 127.9, 126.7, 115.4 (d, *J* = 21.2 Hz), 76.2, 69.6, 21.9. **<sup>19</sup>F NMR** (376 MHz, CDCl<sub>3</sub>)  $\delta$  -115.2. **IR** (neat): 3027, 2975, 2928, 2860, 1509, 1222, 1078, 969, 823, 749, 693 cm<sup>-1</sup>. **HRMS** calculated for C<sub>17</sub>H<sub>18</sub>FO [M+H]<sup>+</sup> 257.1342, found 257.1333. **HPLC**: chiral stationary column AD-H, mobile phase hexane/<sup>i</sup>PrOH = 90/10, 1.0 mL/min, 254 nm, 30 °C, *t<sub>R</sub>* (minor) = 4.3 min, *t<sub>R</sub>* (major) = 4.6 min.

**(*S,E*)-1-methyl-4-(((4-phenylbut-3-en-2-yl)oxy)methyl)benzene (3ai)**

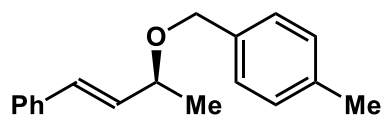

Method A (4 h), colorless oil, 93% yield, 94:6 *er*, >20:1 *rr*,  $[\alpha]_{\text{D}}^{28} = +121.01$  (c 0.40, CH<sub>2</sub>Cl<sub>2</sub>). **<sup>1</sup>H NMR** (400 MHz, CDCl<sub>3</sub>)  $\delta$  7.36 – 7.30 (m, 2H), 7.29 – 7.21 (m, 2H), 7.21 – 7.13 (m, 3H), 7.07 (d, *J* = 7.9 Hz, 2H), 6.46 (d, *J* = 16.0 Hz, 1H), 6.09 (dd, *J* = 16.0, 7.7 Hz, 1H), 4.50 (d, *J* = 11.8 Hz, 1H), 4.32 (d, *J* = 11.8 Hz, 1H), 4.06 – 3.97 (m, 1H), 2.26 (s, 3H), 1.29 (d, *J* = 6.4 Hz, 3H). **<sup>13</sup>C NMR** (101 MHz, CDCl<sub>3</sub>)  $\delta$  137.3, 136.9, 135.9, 132.0, 131.5, 129.2, 128.8, 128.0, 127.8, 126.7, 75.8, 70.1, 22.0, 21.4. **IR** (neat): 3025, 2974, 2926, 2860, 1493, 1078, 968, 801, 748, 693 cm<sup>-1</sup>. **HRMS** calculated for C<sub>18</sub>H<sub>21</sub>O [M+H]<sup>+</sup> 253.1592, found 253.1588. **HPLC**: chiral stationary column OJ-H, mobile phase hexane/<sup>i</sup>PrOH = 90/10, 1.0 mL/min, 254 nm, 30 °C, *t<sub>R</sub>* (minor) = 7.4 min, *t<sub>R</sub>* (major) = 8.5 min.

**(*S,E*)-1-methoxy-4-(((4-phenylbut-3-en-2-yl)oxy)methyl)benzene (3aj)**

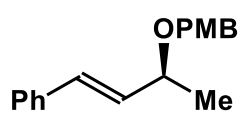

Method A (1 h), colorless oil, 78% yield, 94:6 *er*, >20:1 *rr*,  $[\alpha]_{\text{D}}^{28} = +108.08$  (c 0.52, CH<sub>2</sub>Cl<sub>2</sub>). **<sup>1</sup>H NMR** (400 MHz, CDCl<sub>3</sub>)  $\delta$  7.33

(d,  $J = 7.3$  Hz, 2H), 7.25 (t,  $J = 7.5$  Hz, 2H), 7.22 – 7.14 (m, 3H), 6.80 (d,  $J = 8.6$  Hz, 2H), 6.46 (d,  $J = 16.0$  Hz, 1H), 6.09 (dd,  $J = 16.0, 7.7$  Hz, 1H), 4.47 (d,  $J = 11.5$  Hz, 1H), 4.30 (d,  $J = 11.5$  Hz, 1H), 4.01 (m, 1H), 3.72 (s, 3H), 1.29 (d,  $J = 6.4$  Hz, 3H).  $^{13}\text{C}$  NMR (101 MHz,  $\text{CDCl}_3$ )  $\delta$  159.3, 136.9, 132.0, 131.5, 131.0, 129.5, 128.8, 127.8, 126.7, 114.0, 75.7, 69.9, 55.5, 22.0. IR (neat): 3026, 2972, 2929, 2861, 1512, 1246, 1070, 968, 749, 693  $\text{cm}^{-1}$ . HRMS calculated for  $\text{C}_{18}\text{H}_{21}\text{O}_2$   $[\text{M}+\text{H}]^+$  269.1542, found 269.1538. HPLC: chiral stationary column OJ-H, mobile phase hexane/ $i$ -PrOH = 90/10, 1.0 mL/min, 254 nm, 30 °C,  $t_{\text{R}}$  (minor) = 14.0 min,  $t_{\text{R}}$  (major) = 14.9 min.

**((*S,E*)-3-(((*S*)-3,7-dimethyloct-6-en-1-yl)oxy)but-1-en-1-yl)benzene (3ak)**

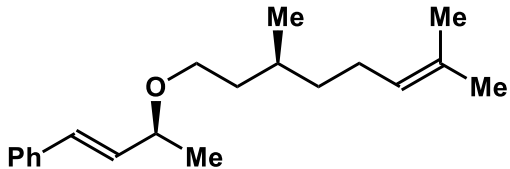 Method A (7 h), colorless oil, 73% yield, >20:1 *dr*, >20:1 *rr*,  $[\alpha]_{\text{D}}^{28} = +52.27$  (c 0.44,  $\text{CH}_2\text{Cl}_2$ ).  $^1\text{H}$  NMR (400 MHz,  $\text{CDCl}_3$ )  $\delta$  7.35 – 7.29 (m, 2H), 7.24 (t,  $J = 7.5$  Hz, 2H), 7.20 – 7.13 (m, 1H), 6.44 (d,  $J = 16.0$  Hz, 1H), 6.04 (dd,  $J = 15.9, 7.5$  Hz, 1H), 5.07 – 4.98 (m, 1H), 3.96 – 3.86 (m, 1H), 3.50 – 3.40 (m, 1H), 3.37 – 3.26 (m, 1H), 1.99 – 1.82 (m, 2H), 1.63 – 1.44 (m, 8H), 1.37 – 1.23 (m, 5H), 1.14 – 1.03 (m, 1H), 0.81 (d,  $J = 6.6$  Hz, 3H).  $^{13}\text{C}$  NMR (101 MHz,  $\text{CDCl}_3$ )  $\delta$  137.0, 132.4, 131.3, 130.9, 128.7, 127.7, 126.6, 125.0, 76.6, 66.9, 37.5, 37.1, 29.8, 25.9, 25.7, 21.9, 19.8, 17.8. IR (neat): 3026, 2966, 2926, 2856, 1091, 967, 748, 692  $\text{cm}^{-1}$ . HRMS calculated for  $\text{C}_{20}\text{H}_{31}\text{O}$   $[\text{M}+\text{H}]^+$  287.2375, found 287.2372.

**((*S,E*)-3-(cyclopropoxy)but-1-en-1-yl)benzene (3al)**

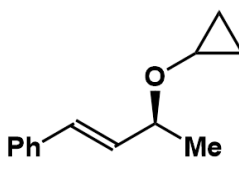 Method A (4 h), colorless oil, 88% yield, 97:3 *er*, >20:1 *rr*,  $[\alpha]_{\text{D}}^{28} = +154.75$  (c 0.5,  $\text{CH}_2\text{Cl}_2$ ).  $^1\text{H}$  NMR (400 MHz,  $\text{CDCl}_3$ )  $\delta$  7.35 – 7.28 (m, 2H), 7.24 (t,  $J = 7.5$  Hz, 2H), 7.19 – 7.12 (m, 1H), 6.49 (d,  $J = 15.9$  Hz, 1H), 6.10 (dd,  $J = 15.9, 7.5$  Hz, 1H), 4.11 – 4.02 (m, 1H), 3.30 – 3.22 (m, 1H), 1.24 (d,  $J = 6.4$  Hz, 3H), 0.62 – 0.53 (m, 1H), 0.51 – 0.30 (m, 3H).  $^{13}\text{C}$  NMR (101 MHz,  $\text{CDCl}_3$ )  $\delta$  137.0, 132.1, 131.0, 128.7, 127.8, 126.6, 77.0, 51.3, 21.8, 6.3, 5.6. IR (neat): 3026, 2976, 2928, 2868, 1449, 1064, 966, 749, 693  $\text{cm}^{-1}$ . HRMS calculated for  $\text{C}_{13}\text{H}_{17}\text{O}$   $[\text{M}+\text{H}]^+$  189.1279, found 189.1275.

H, mobile phase hexane/*i*PrOH = 99/1, 1.0 mL/min, 254 nm, 30 °C,  $t_R$  (minor) = 6.4 min,  $t_R$  (major) = 7.0 min.

### (*S,E*)-(3-(cyclopentyloxy)but-1-en-1-yl)benzene (**3am**)

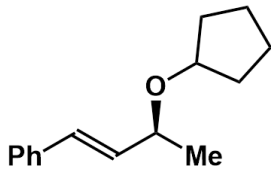 Method A (60 °C, 3 h), colorless oil, 65% yield, 91:9 *er*, >20:1 *rr*,  $[\alpha]_D^{28} = +84.35$  (c 0.46, CH<sub>2</sub>Cl<sub>2</sub>). <sup>1</sup>H NMR (400 MHz, CDCl<sub>3</sub>)  $\delta$  7.31 (d,  $J = 7.4$  Hz, 2H), 7.24 (t,  $J = 7.5$  Hz, 2H), 7.15 (t,  $J = 7.3$  Hz, 1H), 6.43 (d,  $J = 16.0$  Hz, 1H), 6.06 (dd,  $J = 15.9, 7.3$  Hz, 1H), 4.04 – 3.90 (m, 2H), 1.72 – 1.60 (m, 4H), 1.59 – 1.49 (m, 2H), 1.46 – 1.35 (m, 2H), 1.23 (d,  $J = 6.4$  Hz, 3H). <sup>13</sup>C NMR (101 MHz, CDCl<sub>3</sub>)  $\delta$  137.1, 133.0, 130.4, 128.7, 127.7, 126.6, 78.7, 74.5, 33.4, 32.3, 23.71, 23.70, 22.3. IR (neat): 3026, 2963, 2869, 1449, 1076, 967, 748, 692 cm<sup>-1</sup>. HRMS calculated for C<sub>15</sub>H<sub>21</sub>O [M+H]<sup>+</sup> 217.1592, found 217.1588. HPLC: chiral stationary column AD-H, mobile phase hexane/*i*PrOH = 99/1, 1.0 mL/min, 254 nm, 30 °C,  $t_R$  (minor) = 4.0 min,  $t_R$  (major) = 4.2 min.

## 4. Mechanistic studies

### 4.1. Acid/base additives for hydroalkoxylation

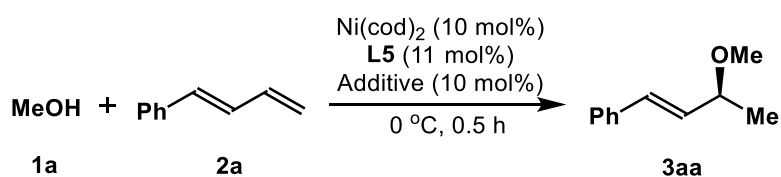

In a N<sub>2</sub>-filled glovebox, (*R,R*)-Me-DuPhos (6.7 mg, 0.022 mmol) and 1,3-diene **2a** (78.1 mg, 0.6 mmol) were added to a 1-dram vial containing Ni(cod)<sub>2</sub> (5.6 mg, 0.02 mmol). The resulting mixture was stirred for 10 min and then additive (0.02 mmol) and alcohol **1a** (6.4 mg, 0.2 mmol) were added. The mixture was removed from the glovebox and was held at 0 °C for 0.5 h. The NMR yield were determined by <sup>1</sup>H NMR analysis of the unpurified reaction mixture.

| Entry | Additive           | Yield (%) |
|-------|--------------------|-----------|
| 1     | none               | 42%       |
| 2     | TFA                | NR        |
| 3     | xylylic acid       | NR        |
| 4     | TsOH               | NR        |
| 5     | Et <sub>3</sub> N  | 42%       |
| 6     | NaOH               | 42%       |
| 7     | <sup>t</sup> BuONa | 14%       |

## 4.2. Kinetic studies

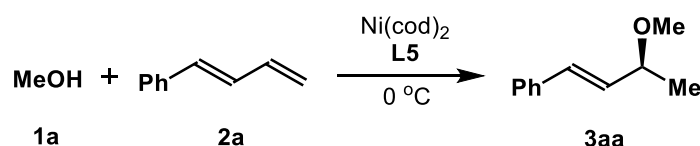

The kinetic profile of the reaction was determined using the variable time normalization analysis (VTNA) method described by Burés.<sup>11</sup> Rates were monitored using GC-FID analysis with 1,3,5-trimethoxybenzene as a standard. Catalyst concentration was assumed to remain constant over the duration of the reaction. Integrals were calculated using the trapezoid rule approximation:

$$f(t_n) = \int_0^{t_n} [X]^x dt \approx \sum_{i=1}^n \left( \frac{[X]_i + [X]_{i-1}}{2} \right)^2 (t_i - t_{i-1})$$

### Same excess experiment

Representative procedure: In a N<sub>2</sub>-filled glovebox, (*R,R*)-Me-DuPhos (6.7 mg, 0.022 mmol) and 1,3-diene **2a** (78.1 mg, 0.6 mmol; or 88.5 mg, 0.68 mmol) were added to a 1-dram vial containing Ni(cod)<sub>2</sub> (5.6 mg, 0.02 mmol). The resulting mixture was stirred for 10 min and then 1,3,5-trimethoxybenzene and alcohol **1a** (6.4 mg, 0.2 mmol; 9.0 mg, 0.28 mmol) were added. The mixture was removed from the glovebox and was

held at 0 °C. Aliquots (1  $\mu$ L) were taken and quenched in 1 mL of EtOAc. The amount of **3aa** was monitored by GC-FID analysis. A good graphical overlay indicates that there is no catalyst deactivation or product inhibition.

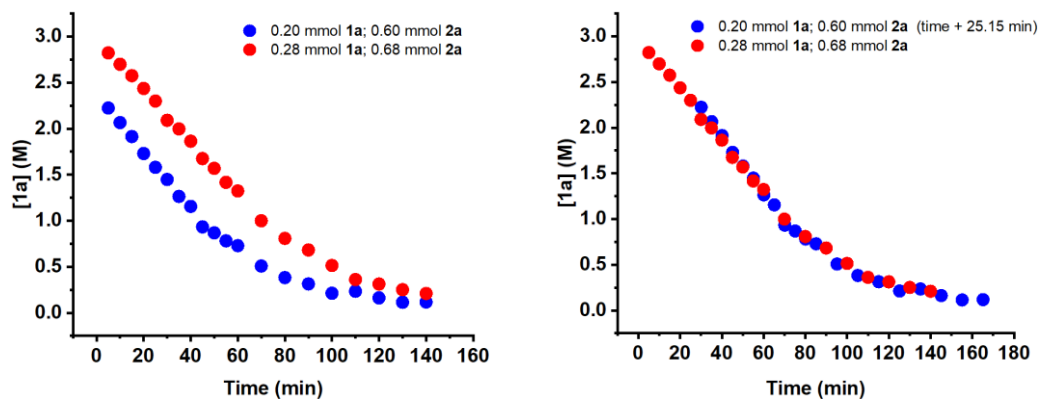

**Figure S1.** “Same excess” experiment graphs. Overlay of the reaction profiles was observed after time adjustment (blue points; time + 25.15 min).

#### **Determination of the reaction order in alcohol (1):**

Representative procedure: In a  $N_2$ -filled glovebox, (*R,R*)-Me-DuPhos (6.7 mg, 0.022 mmol) and 1,3-diene **2a** (78.1 mg, 0.6 mmol) were added to a 1-dram vial containing  $Ni(cod)_2$  (5.6 mg, 0.02 mmol). The resulting mixture was stirred for 10 min and then 1,3,5-trimethoxybenzene and alcohol **1a** (3.2-16 mg, 0.1-0.5 mmol) were added. The mixture was removed from the glovebox and was held at 0 °C. Aliquots (1  $\mu$ L) were taken and quenched in 1 mL of EtOAc. The amount of **3aa** was monitored by GC-FID analysis. By visual analysis, it is concluded that the reaction order depends on the concentration of alcohol. Fractional order was observed when using lower concentration of **1a**. Inverse order was observed when using higher concentration.

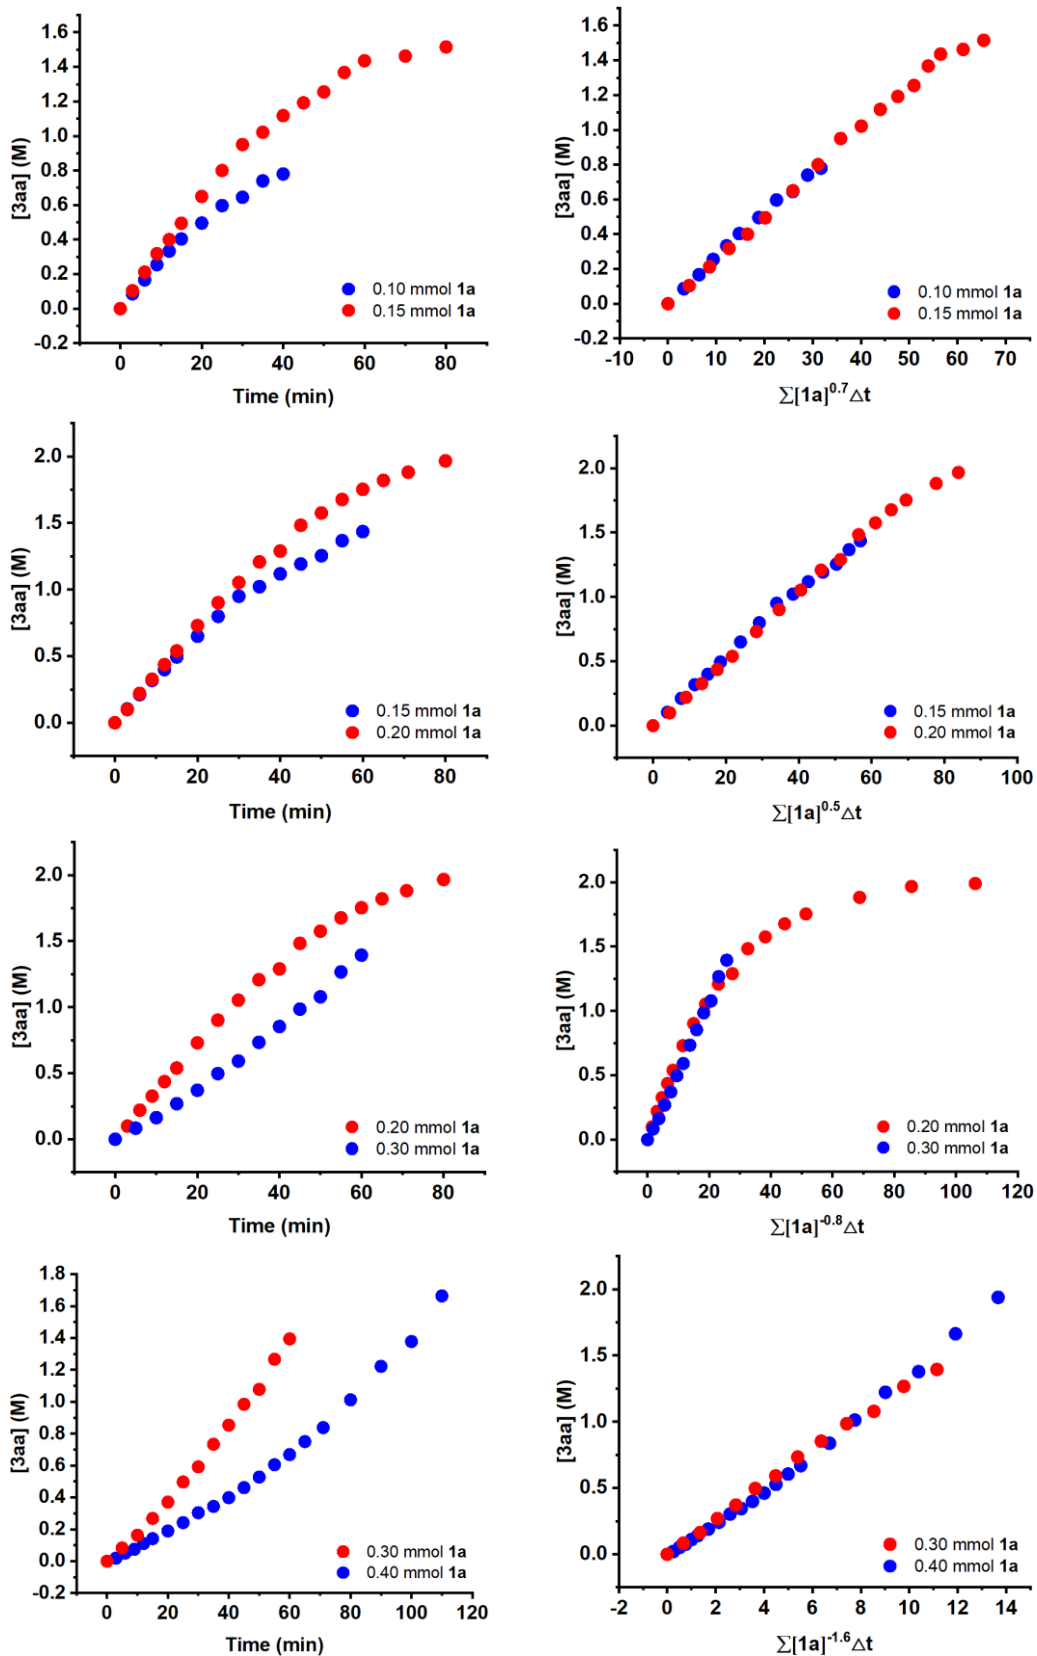



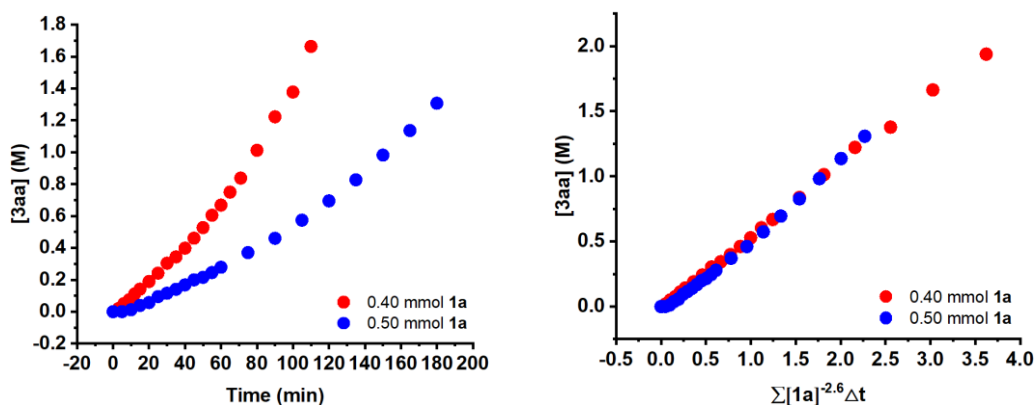

**Figure S2.** VTNA graphs for **1a**. Fractional order was observed when using lower concentration of **1a**. Inverse order was observed when using higher concentration.

### Determination of the reaction order in diene (**2**)

Representative procedure: In a N<sub>2</sub>-filled glovebox, (*R,R*)-Me-DuPhos (6.7 mg, 0.022 mmol) and 1,3-diene **2a** (52.1-104.2 mg, 0.4-0.8 mmol) was added to a 1-dram vial containing Ni(cod)<sub>2</sub> (5.6 mg, 0.02 mmol). The resulting mixture was stirred for 10 min and then 1,3,5-trimethoxybenzene and alcohol **1a** (6.4 mg, 0.2 mmol) were added. The mixture was removed from the glovebox and was held at 0 °C. Aliquots (1 μL) were taken and quenched in 1 mL of EtOAc. The amount of **3aa** was monitored by GC-FID analysis. By visual analysis, it is concluded that the reaction rate is zero order with respect to diene (**2**).

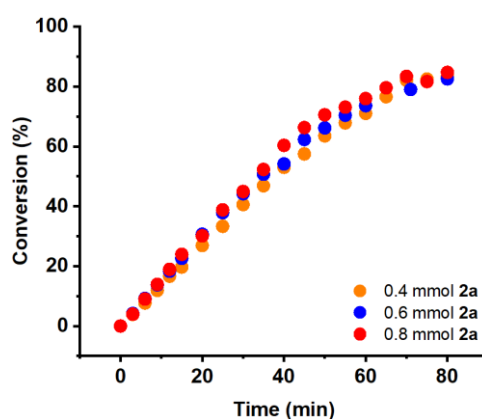

**Figure S3.** VTNA graphs for **2a**. Conversion instead of concentration was used because diene is used as the solvent. Overlay of the reaction profiles when using zero order analysis indicates that the reaction is zero order with respect to diene (**2**).

### Determination of the reaction order in catalyst

Representative procedure: In a N<sub>2</sub>-filled glovebox, (*R,R*)-Me-DuPhos (6.7 mg, 0.022 mmol; or 10.1 mg, 0.033 mmol) and 1,3-diene **2a** (78.1 mg, 0.6 mmol) were added to a 1-dram vial containing Ni(cod)<sub>2</sub> (5.6 mg, 0.02 mmol; or 8.4 mg, 0.03 mmol). The resulting mixture was stirred for 10 min and then 1,3,5-trimethoxybenzene and alcohol **1a** (6.4 mg, 0.2 mmol) were added. The mixture was removed from the glovebox and was held at 0 °C. Aliquots (1 μL) were taken and quenched in 1 mL of EtOAc. The amount of **3aa** was monitored by GC-FID analysis. By visual analysis, it is concluded that the reaction rate is first order with respect to catalyst.

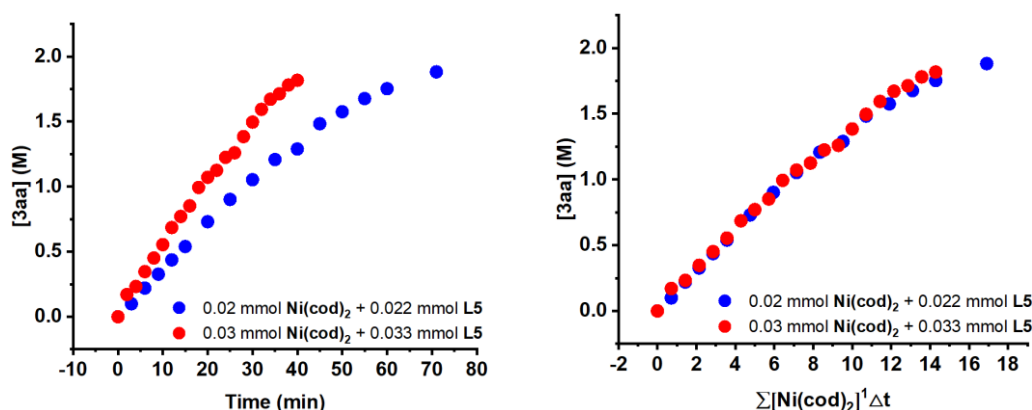

**Figure S4.** VTNA graphs for Ni-catalyst. Overlay of the reaction profiles when using first order analysis indicates that the reaction is first order with respect to catalyst.

### 4.3. NMR Monitoring

In a N<sub>2</sub>-filled glovebox, (*R,R*)-Me-DuPhos (13.5 mg, 0.044 mmol) and 1,3-diene **2a** (418.4 mg, 3.214 mmol) were added to a 1-dram vial containing Ni(cod)<sub>2</sub> (11.2 mg, 0.04 mmol). The resulting mixture was stirred for 10 min and transferred to an NMR tube. <sup>31</sup>P NMR of this mixture were immediately recorded. Two singlets along with a broad signal were observed (A). The signal at 62.2 ppm corresponds to the heteroleptic complex (cod)Ni(L5), while the signal at 67.5 ppm corresponds to the homoleptic complex Ni(L5)<sub>2</sub>. The broad signal is attributed to (**2a**)Ni(L5). The tube mentioned-above was brought back into the glovebox, and neat MeOH **1a** (51.4 mg, 1.607 mmol) or **3aa** (9.7 mg, 0.06 mmol) was added to the tube. <sup>31</sup>P NMR of these mixture were

immediately recorded. When **1a** was subjected to a mixture of Ni(cod)<sub>2</sub> and **L5** in diene **2a**, a new Ni complex with non-equivalent phosphine resonances [a pair of doublet signals ( $\delta = 68.8$  ppm,  $J_{P-P} = 59.3$  Hz;  $\delta = 64.6$  ppm,  $J_{P-P} = 59.3$  Hz)] was observed, and this new species is attributed to intermediate **III** (**B**). When product **3aa** was subjected to a mixture of Ni(cod)<sub>2</sub> and **L5** in diene **2a**, the <sup>31</sup>P NMR spectrum is same with just Ni(cod)<sub>2</sub> and **L5** in diene **2a** (**C**), and this excludes the intermediate species where product binding to Ni-catalyst as the resting state. Moreover, a mixture of Ni(cod)<sub>2</sub> and **L5** in *d*-methanol (0.5 mL) with addition of methanol was also monitored, and there is also no new Ni-complex species observed. On basis of these observations and our kinetic studies, we postulate intermediate **III** as the resting state. We assigned <sup>31</sup>P NMR peaks of complexes (cod)Ni(**L5**) and Ni(**L5**)<sub>2</sub> on the basis of those reported in the literature.<sup>12</sup> There is no <sup>1</sup>H NMR analysis because the experiment was conducted using the diene as the solvent.

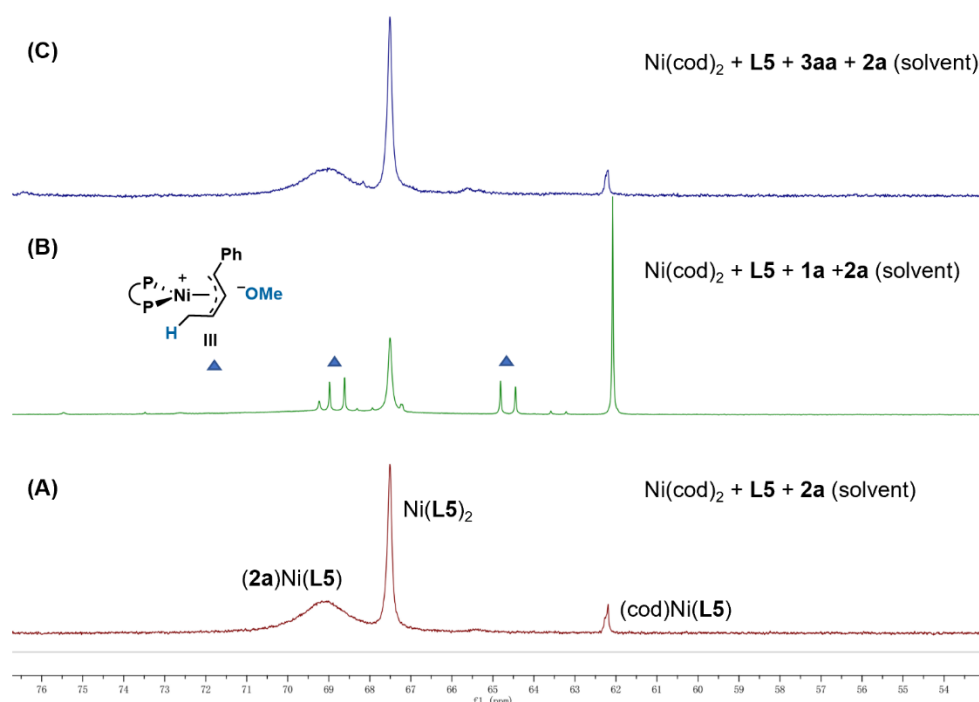

#### 4.4. Electrospray MS (ESI-MS) analysis

In a N<sub>2</sub>-filled glovebox, (*R, R*)-Me-DuPhos (6.7 mg, 0.022 mmol) and 1,3-diene **2f** (104.0 mg, 0.6 mmol) were added to a 1-dram vial containing Ni(cod)<sub>2</sub> (5.6 mg, 0.02 mmol). The resulting mixture was stirred for 10 min at 60 °C and then **1a** (6.4 mg, 0.2

mmol) was added with stirring for another 10 min. The catalytic solution was immediately subjected to electrospray MS (ESI-MS) analysis. HRMS calculated for  $C_{30}H_{44}NNiP_2^+$  538.2297, found 538.2289.

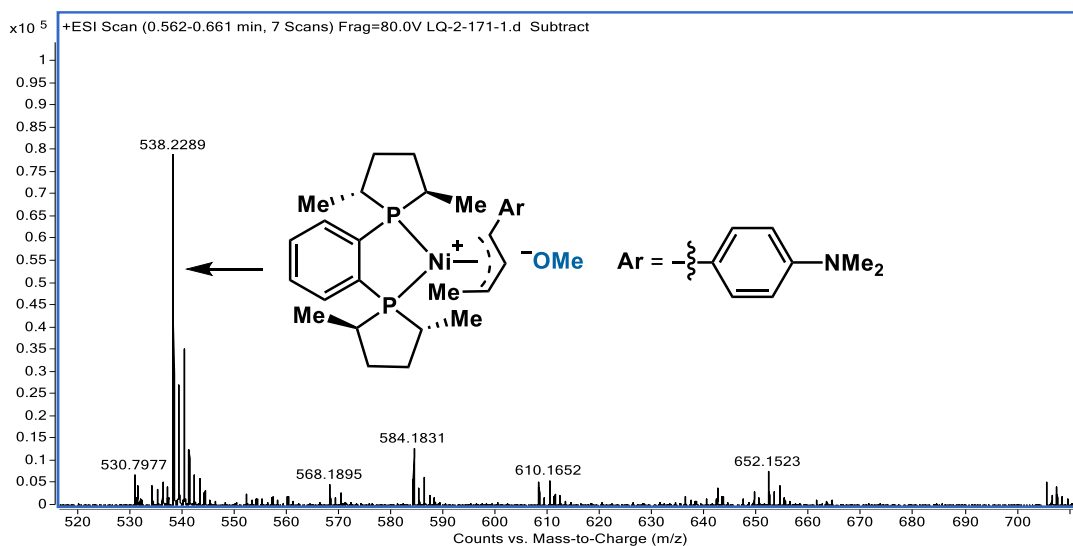

#### 4.5. Initial rate *KIE* study

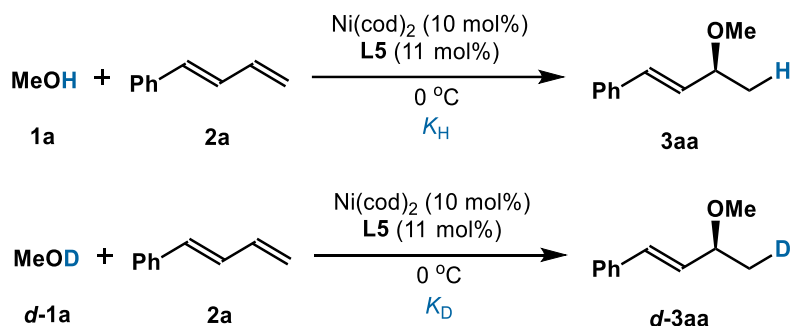

In a  $N_2$ -filled glovebox, (*R,R*)-Me-DuPhos (6.7 mg, 0.022 mmol) and 1,3-diene **2a** (78.1 mg, 0.6 mmol) was added to a 1-dram vial containing  $Ni(cod)_2$  (5.6 mg, 0.02 mmol). The resulting mixture was stirred for 10 min and then **1a** (6.4 mg, 0.2 mmol) or **d-1a** (6.6 mg, 0.2 mmol) were added. The mixture was removed from the glovebox and was held at 0 °C. Aliquots (1  $\mu$ L) were taken every 3 minutes and quenched in 1 mL of EtOAc. The amount of **3aa** and **d-3aa** were monitored by GC-FID analysis. The *KIE* was determined to be 1.1 using the equation:  $KIE = k_H/k_D$ .

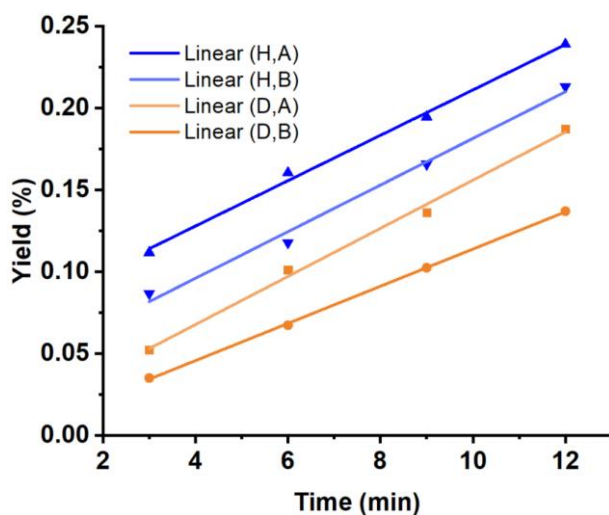

| Trial                | A      | B      | A      | B      | H average<br>$k_{obs}$ | D average<br>$k_{obs}$ |
|----------------------|--------|--------|--------|--------|------------------------|------------------------|
| Alcohol              | H      | H      | D      | D      | --                     | --                     |
| $k_{obs}$<br>(%/min) | 0.0139 | 0.0142 | 0.0147 | 0.0114 | 0.0141                 | 0.0131                 |
| $R^2$                | 0.9959 | 0.9911 | 0.9952 | 0.9996 | --                     | --                     |

Figure S5. Initial rate *KIE* for hydroalkoxylation.

#### 4.6. Deuterium-labeling study

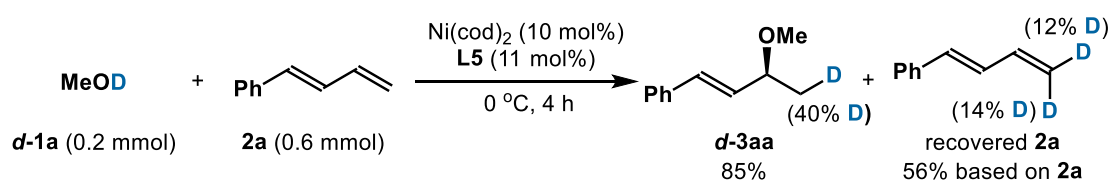

In a  $\text{N}_2$ -filled glovebox, (*R,R*)-Me-DuPhos (6.7 mg, 0.022 mmol) and 1,3-diene **2a** (78.1 mg, 0.6 mmol) were added to a 1-dram vial containing  $\text{Ni(cod)}_2$  (5.6 mg, 0.02 mmol). The resulting mixture was stirred for 10 min and then **d-1a** (6.6 mg, 0.2 mmol) was added. The mixture was removed from the glovebox and was held at 0 °C for 4 h. The regioselectivity was determined by  $^1\text{H}$  NMR analysis of the unpurified reaction mixture. The product **d-3aa** was purified by preparative thin-layer chromatography: 85%

yield, colorless oil, >20:1 *rr*.  $^1\text{H NMR}$  for ***d*-3aa** (400 MHz,  $\text{CDCl}_3$ )  $\delta$  7.42 – 7.36 (m, 2H), 7.32 (t,  $J = 7.5$  Hz, 2H), 7.27 – 7.21 (m, 1H), 6.54 (d,  $J = 16.0$  Hz, 1H), 6.10 (dd,  $J = 16.0, 7.6$  Hz, 1H), 3.94 – 3.85 (m, 1H), 3.32 (s, 3H), 1.36 – 1.30 (m, 2.6H).  $^1\text{H NMR}$  for recovered diene (400 MHz,  $\text{CDCl}_3$ )  $\delta$  7.47 – 7.39 (m, 2H), 7.33 (t,  $J = 7.5$  Hz, 2H), 7.28 – 7.19 (m, 1H), 6.81 (dd,  $J = 15.6, 10.5$  Hz, 1H), 6.63 – 6.47 (m, 2H), 5.40 – 5.29 (m, 0.88H), 5.23 – 5.14 (m, 0.86H).

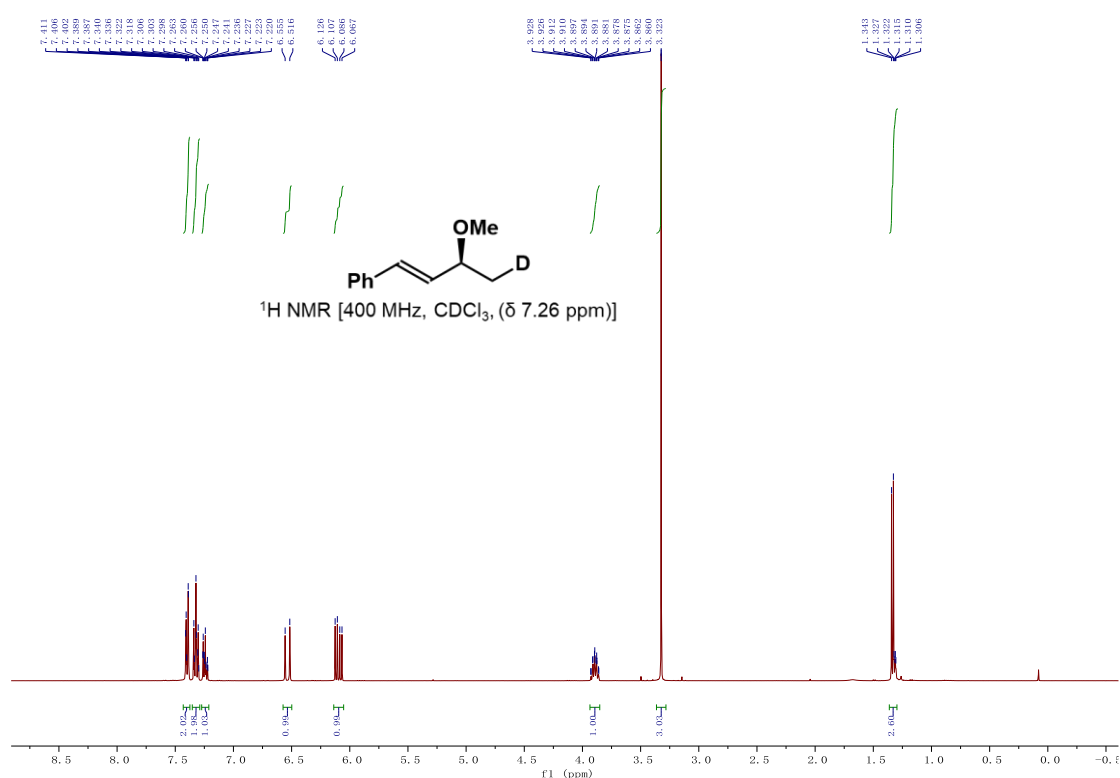

**Figure S6.**  $^1\text{H NMR}$  [400 MHz,  $\text{CDCl}_3$  ( $\delta$  7.26 ppm)] for ***d*-3aa**.

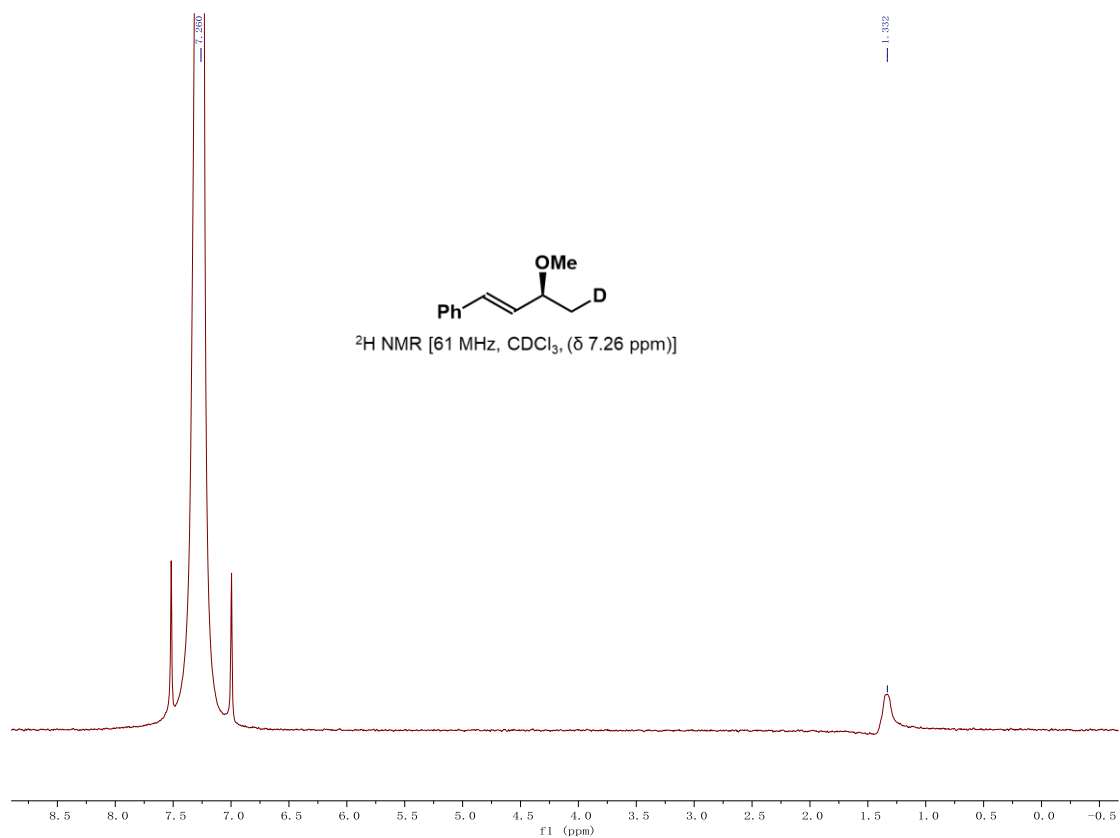

**Figure S7.**  $^2\text{H}$  NMR [61 MHz,  $\text{CDCl}_3$  ( $\delta$  7.26 ppm)] for *d*-3aa.

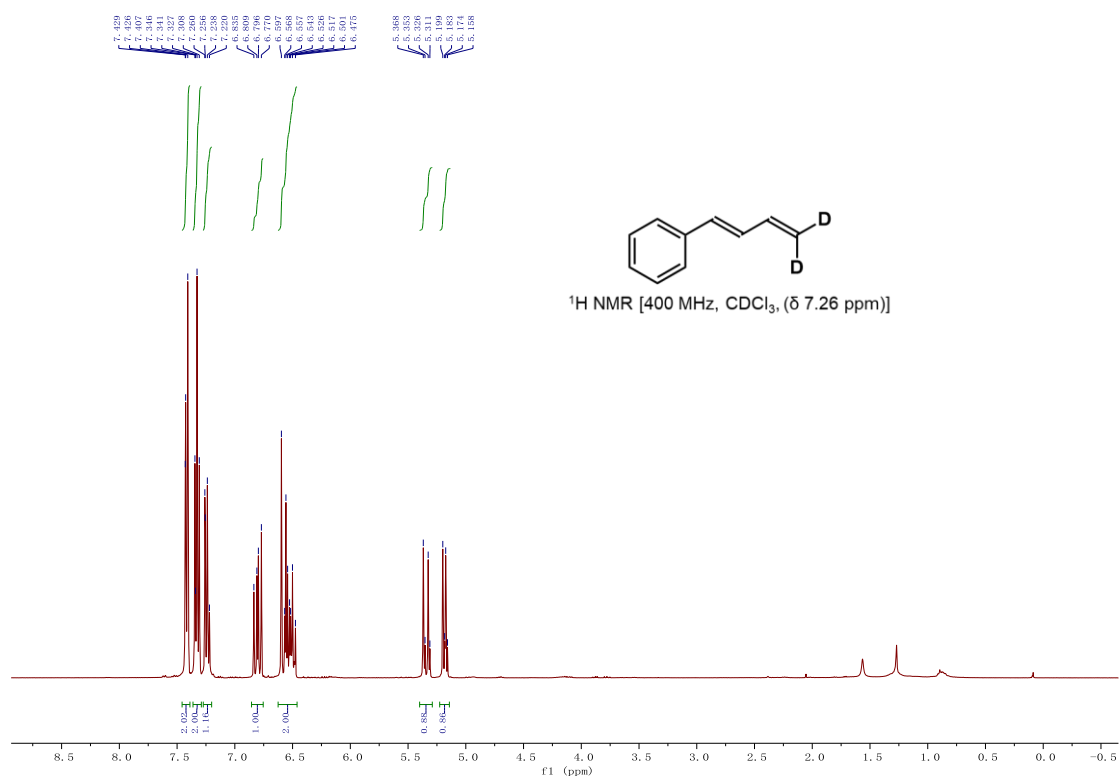

**Figure S8.**  $^1\text{H}$  NMR [400 MHz,  $\text{CDCl}_3$  ( $\delta$  7.26 ppm)] for recovered diene.

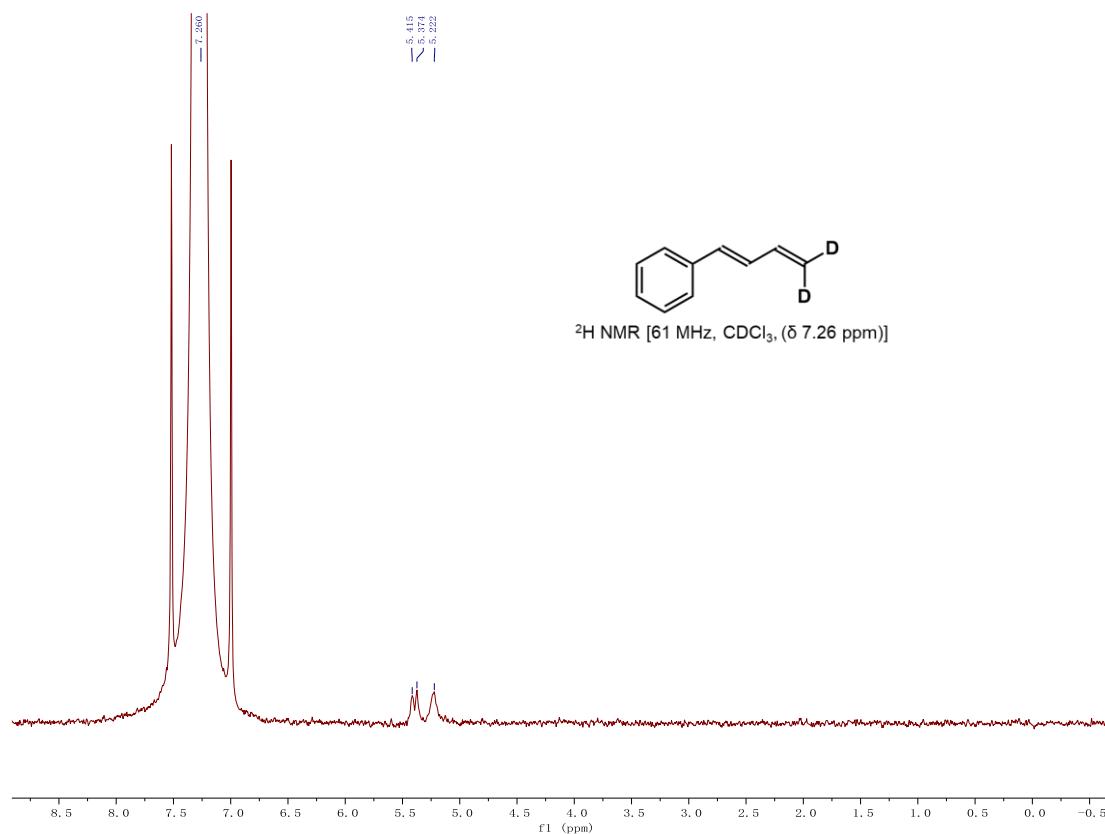

**Figure S9.**  $^2\text{H}$  NMR [61 MHz,  $\text{CDCl}_3$  ( $\delta$  7.26 ppm)] for recovered diene.

#### 4.7. Diene geometry study

##### Synthesis of the mixture of (*Z*) and (*E*)-**2a** (3:1)

A mixture of (*Z*) and (*E*)-**2a** (3:1) was synthesized according to the literature.<sup>13</sup>  $^1\text{H}$  NMR for (*Z*) and (*E*)-**2a** (3:1) (400 MHz,  $\text{CDCl}_3$ )  $\delta$  7.35 – 7.21 (m, 4H), 7.19 – 7.12 (m, 1H), 6.90 – 6.67 (m, 1H), 6.53 – 6.13 (m, 2H), 5.34 – 5.22 (m, 1H), 5.17 – 5.07 (m, 1H).



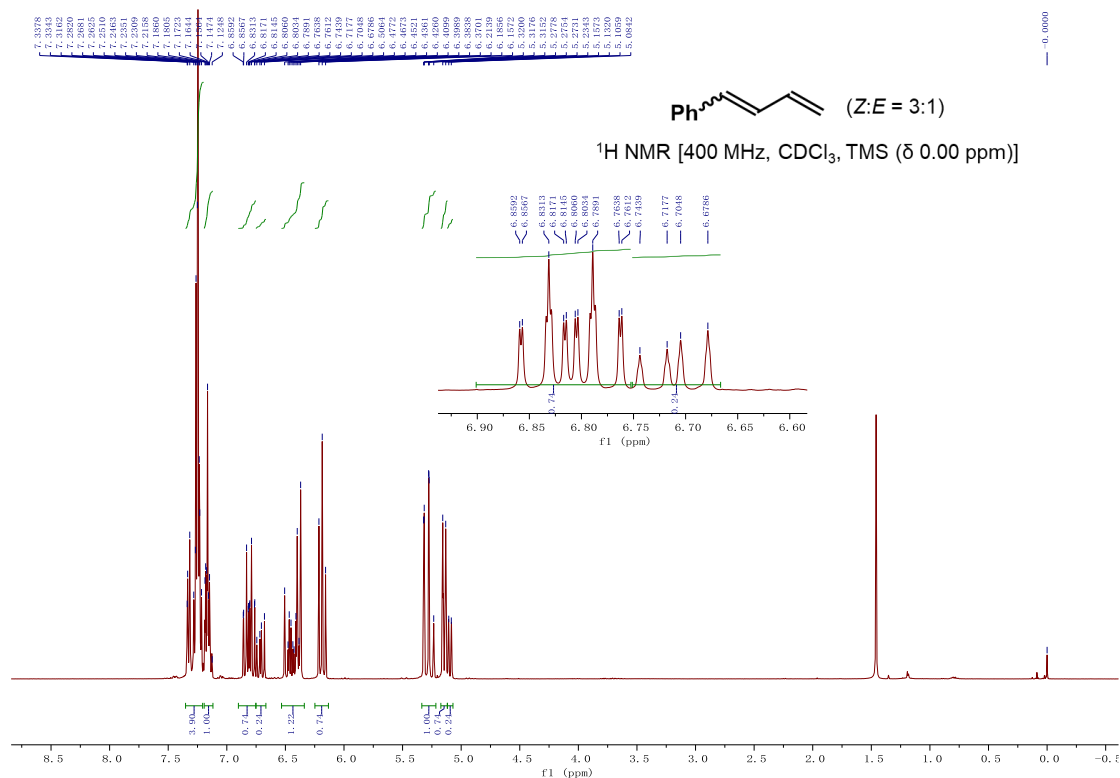

**Figure S10.** <sup>1</sup>H NMR [400 MHz, CDCl<sub>3</sub>, TMS (δ 0.00 ppm)] for (Z) and (E)-**2a** (3:1).

### Hydroalkoxylation of the mixture of (Z) and (E)-**2a** (3:1)

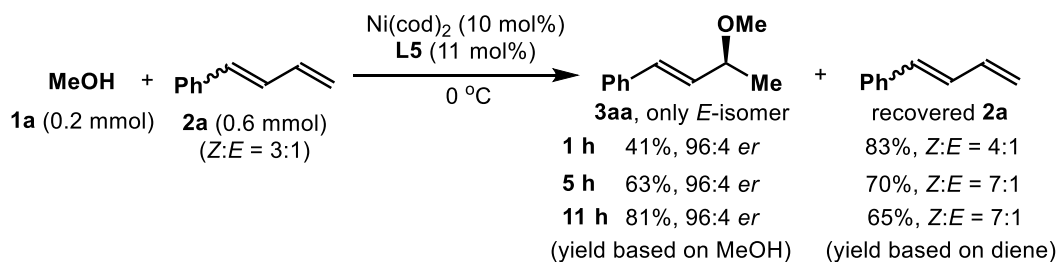

Following the “Method A” in “General procedure for hydroalkoxylation of 1,3-dienes”, **2a** (Z:E = 3:1) was used to react with **1a**. Only the (*E*)-**3aa** was obtained: Colorless oil, 41% (1 h) – 81% (11 h) yield, >20:1 *rr*, 96:4 *er*. And a mixture of recovered (Z) and (*E*)-**2a** (4:1 (1 h) – 7:1 (11 h)) was recovered.

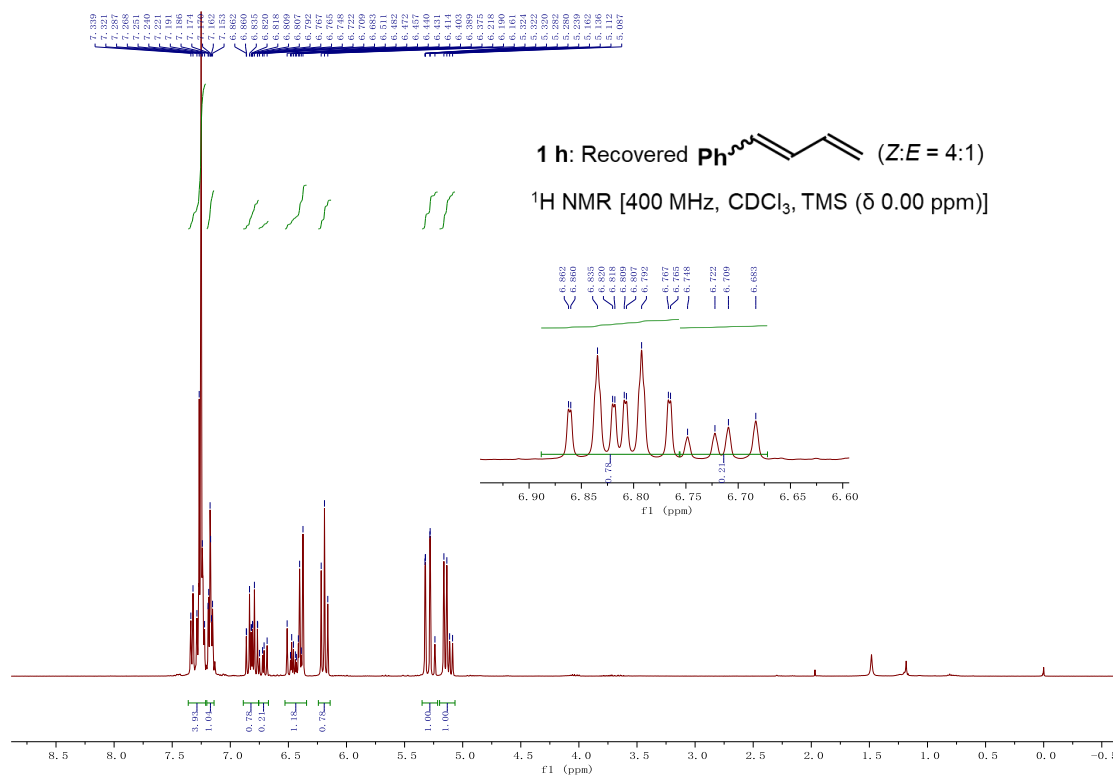

**Figure S11.**  $^1\text{H NMR}$  [400 MHz,  $\text{CDCl}_3$ , TMS ( $\delta$  0.00 ppm)] for recovered ( $Z$ ) and ( $E$ )-**2a** (4:1).

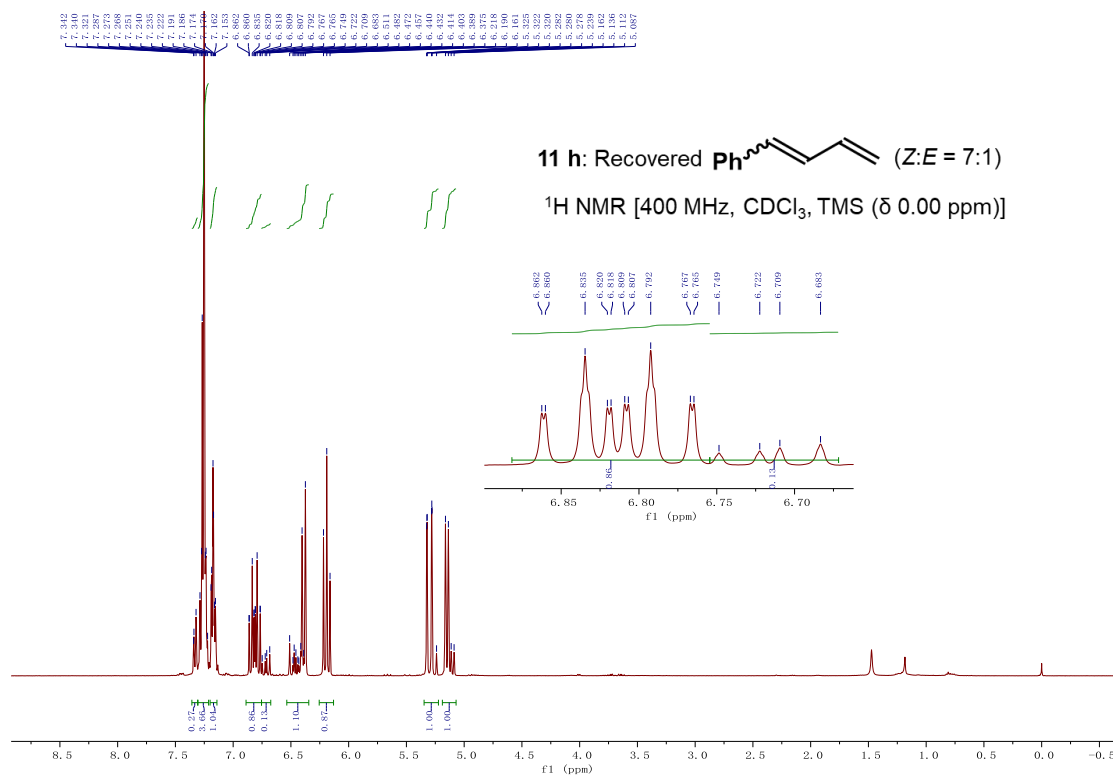

**Figure S12.**  $^1\text{H NMR}$  [400 MHz,  $\text{CDCl}_3$ , TMS ( $\delta$  0.00 ppm)] for recovered ( $Z$ ) and ( $E$ )-**2a** (7:1).

We propose isomerization occurs by protonation (via LLHT) of (*Z*)-**2a** to generate a (*Z*)-allylic nickel intermediate **A**. A familiar  $\sigma$ - $\pi$ - $\sigma$  process occurs to afford intermediate **B**, which converts to conformation **B'** via bond rotation. **B'** also undergoes  $\sigma$ - $\pi$ - $\sigma$  isomerization followed by  $\beta$ -H elimination to give (*E*)-**2a** (Figure 4).<sup>13</sup> Alternatively, intermediate **C** may form the metal- $\pi$ -allyl intermediate and then the product directly.

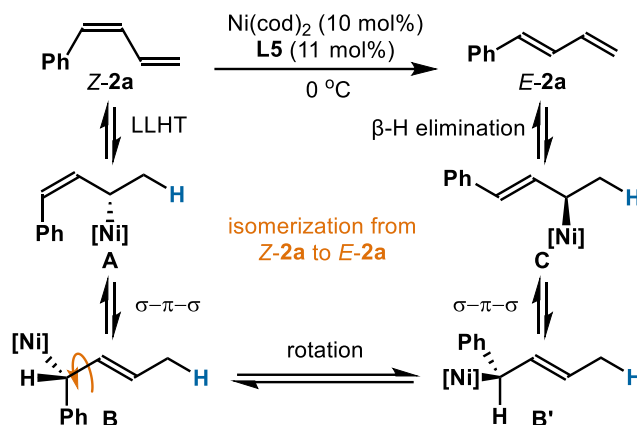

#### 4.8. Cross-over Studies

##### Without solvent

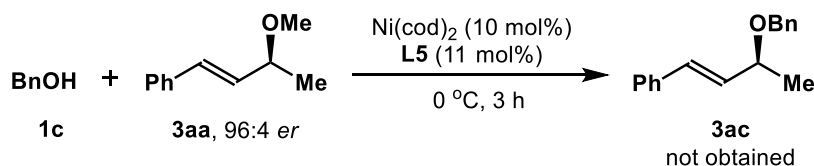

In a  $\text{N}_2$ -filled glovebox, (*R,R*)-Me-DuPhos (2.6 mg, 0.0084 mmol), **3aa** (37 mg, 0.228 mmol, 96:4 *er*), and **1c** (8.2 mg, 0.076 mmol) were added to a 1-dram vial containing  $\text{Ni(cod)}_2$  (2.1 mg, 0.0076 mmol). The resulting mixture was removed from the glovebox and stirred at 0 °C for 3 h. No trace of **3ac** was obtained according to the  $^1\text{H}$  NMR analysis of the unpurified reaction mixture. Enantioselectivity were determined by HPLC. **3aa** and recovered **3aa**: 96:4 *er*, chiral stationary column OJ-H, mobile phase hexane/ $i$ PrOH = 99/1, 1.0 mL/min, 254 nm, 30 °C,  $t_{\text{R}}$  (minor) = 6.9 min,  $t_{\text{R}}$  (major) = 7.4 min.

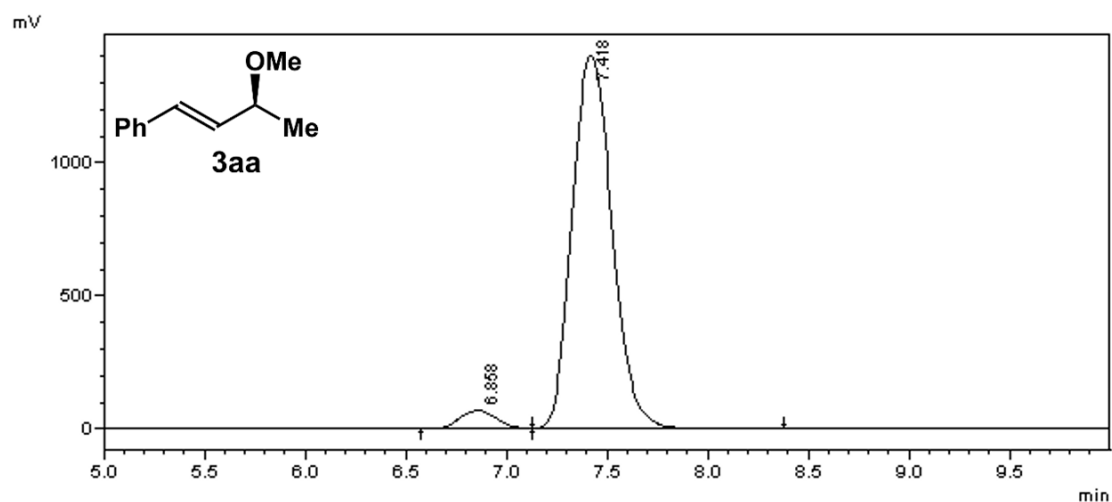

峰表

| 峰# | 保留时间  | 面积       | 高度      | 面积 %   |
|----|-------|----------|---------|--------|
| 1  | 6.858 | 864070   | 67818   | 4.265  |
| 2  | 7.418 | 19394157 | 1399002 | 95.735 |

Translation of Chinese characters to English:

| Peak | Retention time | Area     | Height  | Area % |
|------|----------------|----------|---------|--------|
| 1    | 6.858          | 864070   | 67818   | 4.265  |
| 2    | 7.418          | 19394157 | 1399002 | 95.735 |

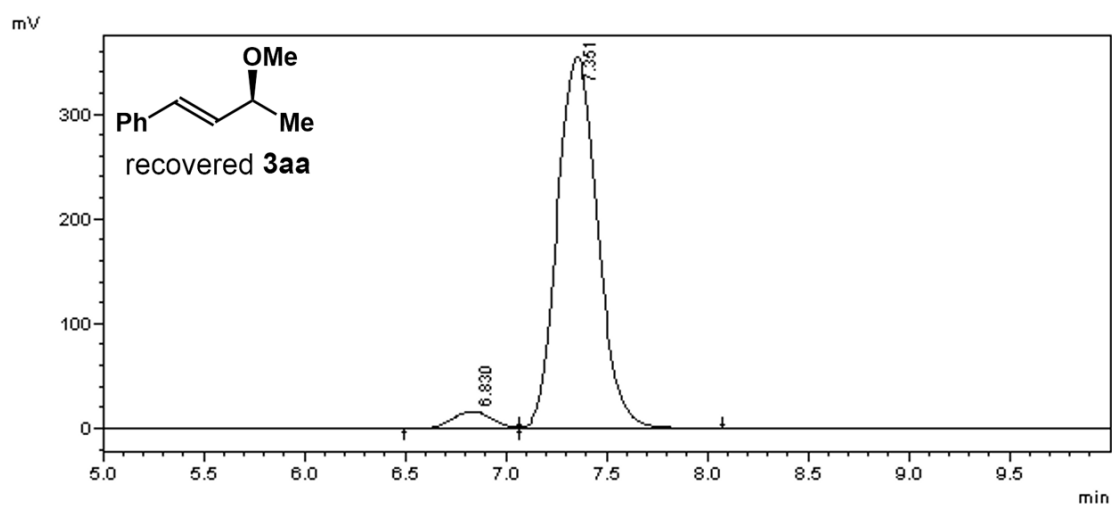

峰表

| 峰# | 保留时间  | 面积      | 高度     | 面积 %   |
|----|-------|---------|--------|--------|
| 1  | 6.830 | 219608  | 16201  | 4.269  |
| 2  | 7.351 | 4924816 | 354213 | 95.731 |

Translation of Chinese characters to English:

| Peak | Retention time | Area    | Height | Area % |
|------|----------------|---------|--------|--------|
| 1    | 6.830          | 219608  | 16201  | 4.269  |
| 2    | 7.351          | 4924816 | 354213 | 95.731 |

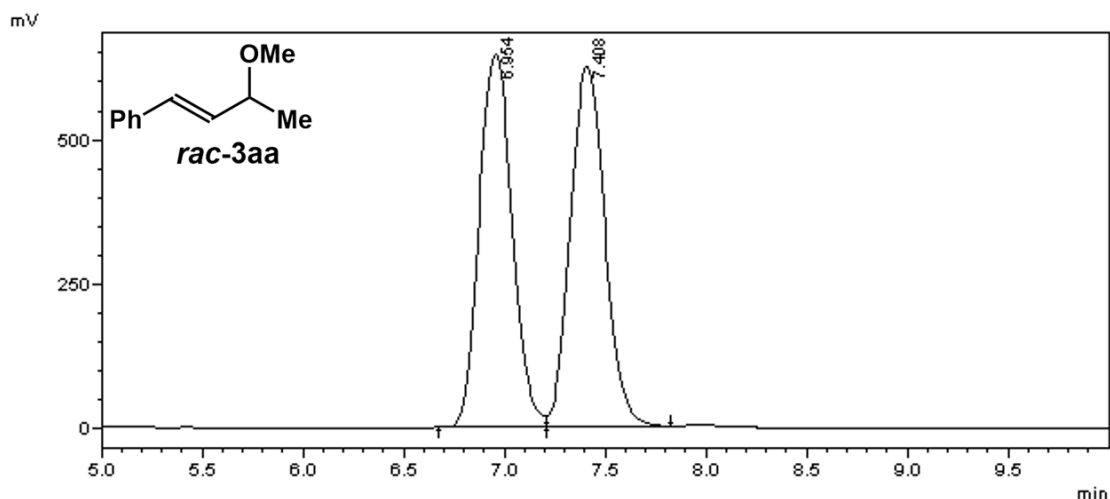

峰表

| 峰# | 保留时间  | 面积      | 高度     | 面积 %   |
|----|-------|---------|--------|--------|
| 1  | 6.954 | 7361837 | 646214 | 49.697 |
| 2  | 7.408 | 7451494 | 624049 | 50.303 |

Translation of Chinese characters to English:

| Peak | Retention time | Area    | Height | Area % |
|------|----------------|---------|--------|--------|
| 1    | 6.954          | 7361837 | 646214 | 49.697 |
| 2    | 7.408          | 7451494 | 624049 | 50.303 |

### With solvent

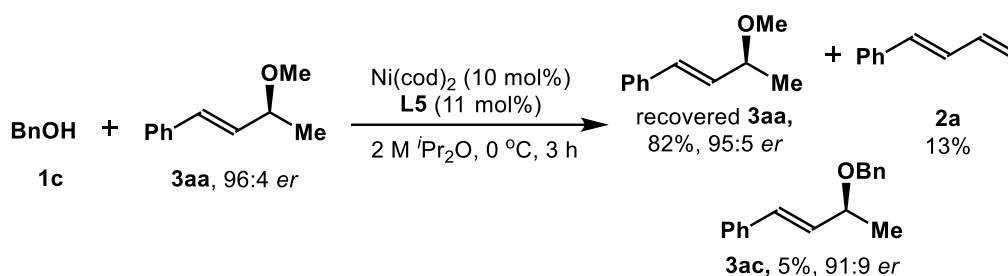

In a N<sub>2</sub>-filled glovebox, (*R,R*)-Me-DuPhos (1.7 mg, 0.0055 mmol) and *t*Pr<sub>2</sub>O (25  $\mu$ L) were added to a 1-dram vial containing Ni(cod)<sub>2</sub> (1.4 mg, 0.005 mmol). The resulting mixture was stirred for 10 min, and then **3aa** (24.3 mg, 0.15 mmol, 96:4 *er*) and **1c** (5.4 mg, 0.05 mmol) were added. The mixture was stirred at 0  $^\circ$ C for 3 h. The amount of **3ac**, **2a**, and **3aa** (5%, 13%, and 82%) was determined by <sup>1</sup>H NMR analysis of the unpurified reaction mixture. Enantioselectivity were determined by HPLC. Recovered

**3aa**: 95:5 *er*, chiral stationary column OJ-H, mobile phase hexane/*i*PrOH = 99/1, 1.0 mL/min, 254 nm, 30 °C,  $t_R$  (minor) = 7.0 min,  $t_R$  (major) = 7.6 min; **3ac**: 91:9 *er*, chiral stationary column OJ-H, mobile phase hexane/*i*PrOH = 90/10, 1.0 mL/min, 254 nm, 30 °C,  $t_R$  (minor) = 7.3 min,  $t_R$  (major) = 8.7 min.

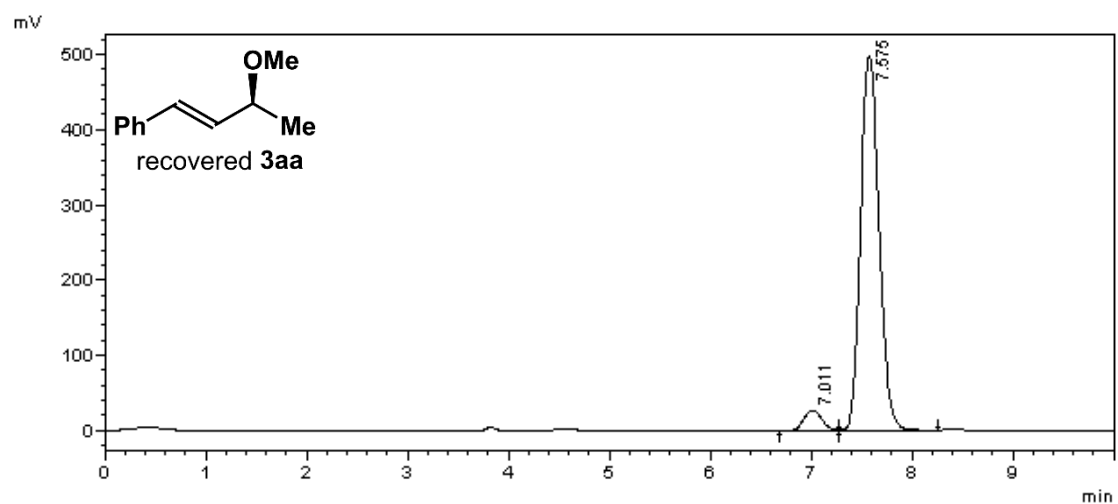

峰表

| 峰# | 保留时间  | 面积      | 高度     | 面积 %   |
|----|-------|---------|--------|--------|
| 1  | 7.011 | 332321  | 26915  | 4.954  |
| 2  | 7.575 | 6375935 | 497740 | 95.046 |

Translation of Chinese characters to English:

| Peak | Retention time | Area    | Height | Area % |
|------|----------------|---------|--------|--------|
| 1    | 7.011          | 332321  | 26915  | 4.954  |
| 2    | 7.575          | 6375935 | 497740 | 95.046 |

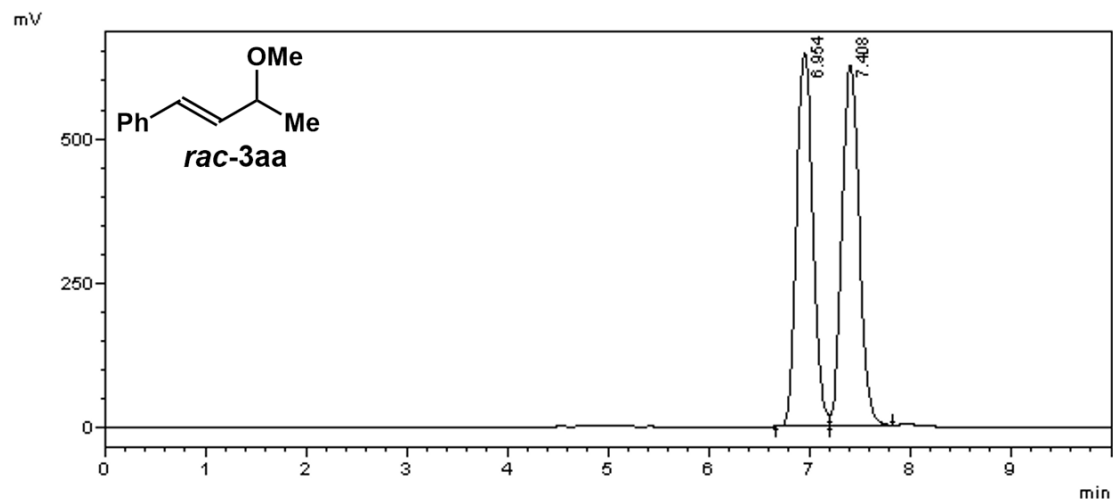

峰表

| 峰# | 保留时间  | 面积      | 高度     | 面积 %   |
|----|-------|---------|--------|--------|
| 1  | 6.954 | 7361837 | 646214 | 49.697 |
| 2  | 7.408 | 7451494 | 624049 | 50.303 |

Translation of Chinese characters to English:

| Peak | Retention time | Area    | Height | Area % |
|------|----------------|---------|--------|--------|
| 1    | 6.954          | 7361837 | 646214 | 49.697 |
| 2    | 7.408          | 7451494 | 624049 | 50.303 |

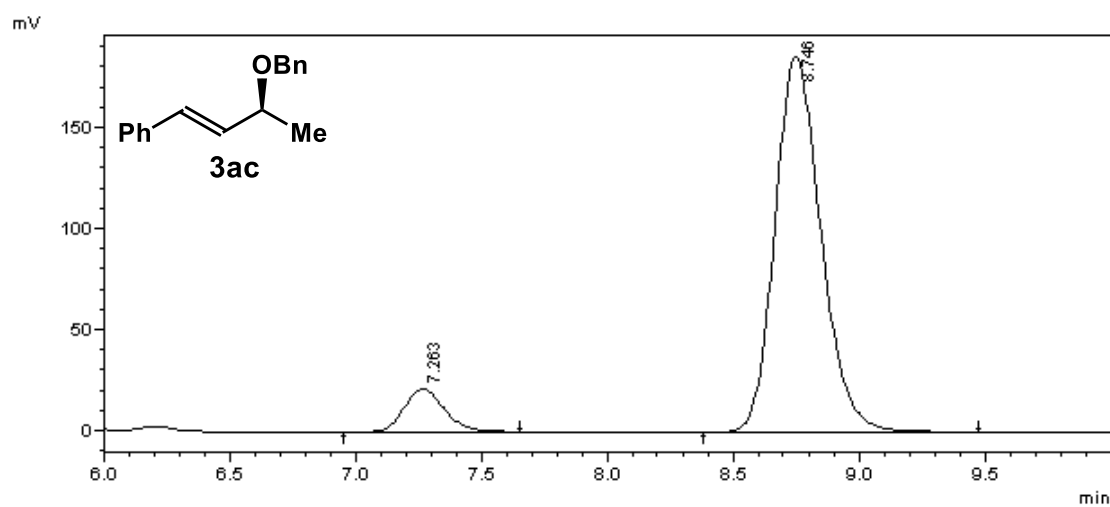

峰表

| 峰# | 保留时间  | 面积      | 高度     | 面积 %   |
|----|-------|---------|--------|--------|
| 1  | 7.263 | 233519  | 21198  | 9.007  |
| 2  | 8.746 | 2359049 | 185349 | 90.993 |

Translation of Chinese characters to English:

| Peak | Retention time | Area    | Height | Area % |
|------|----------------|---------|--------|--------|
| 1    | 7.263          | 233519  | 21198  | 9.007  |
| 2    | 8.746          | 2359049 | 185349 | 90.993 |

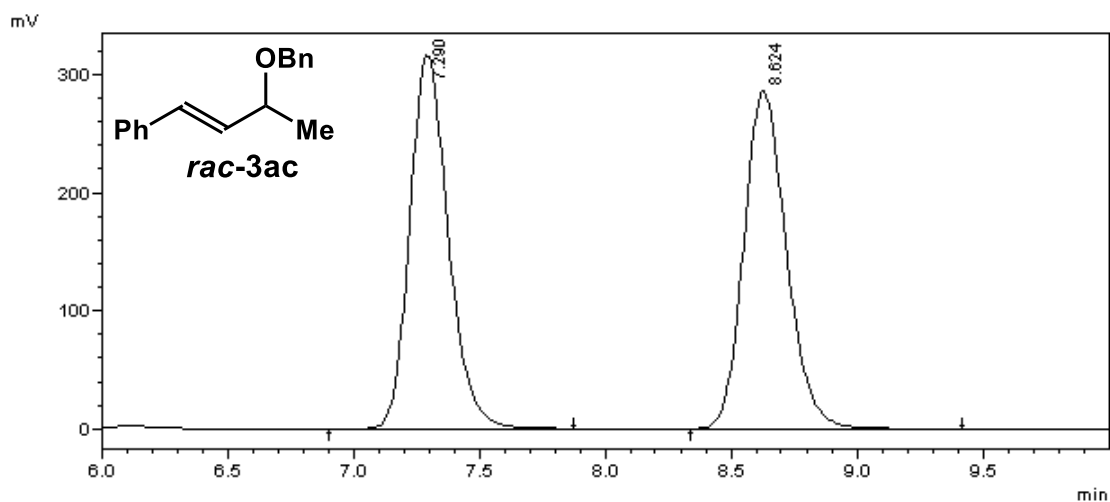

| 峰表 |       |         |        |        |
|----|-------|---------|--------|--------|
| 峰# | 保留时间  | 面积      | 高度     | 面积 %   |
| 1  | 7.290 | 3369964 | 316453 | 50.005 |
| 2  | 8.624 | 3369253 | 285818 | 49.995 |

Translation of Chinese characters to English:

| Peak | Retention time | Area    | Height | Area % |
|------|----------------|---------|--------|--------|
| 1    | 7.290          | 3369964 | 316453 | 50.005 |
| 2    | 8.624          | 3369253 | 255818 | 49.995 |

#### 4.9. Reversibility study for branched 1,3-diene

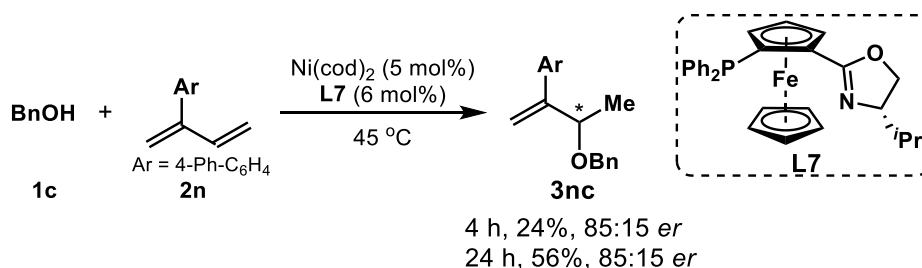

In a N<sub>2</sub>-filled glovebox, **L7** (5.7 mg, 0.012 mmol), 1,3-diene **2n** (41.3 mg, 0.2 mmol), and alcohol **1c** (86.5 mg, 0.8 mmol) were added to a 1-dram vial containing Ni(cod)<sub>2</sub> (2.8 mg, 0.01 mmol). The resulting mixture was stirred at 45 °C. Yields were obtained by <sup>1</sup>H NMR analysis of the unpurified reaction mixture. The product was purified by preparative thin-layer chromatography. The <sup>1</sup>H NMR spectral data matches the literature.<sup>8</sup> Enantioselectivity were determined by HPLC. **3nc** (4 h and 24 h): 85:15 *er*,



chiral stationary column OD-H, mobile phase hexane/*i*PrOH = 99/1, 1.0 mL/min, 254 nm, 30 °C,  $t_R$  (major) = 6.2 min,  $t_R$  (minor) = 6.9 min.

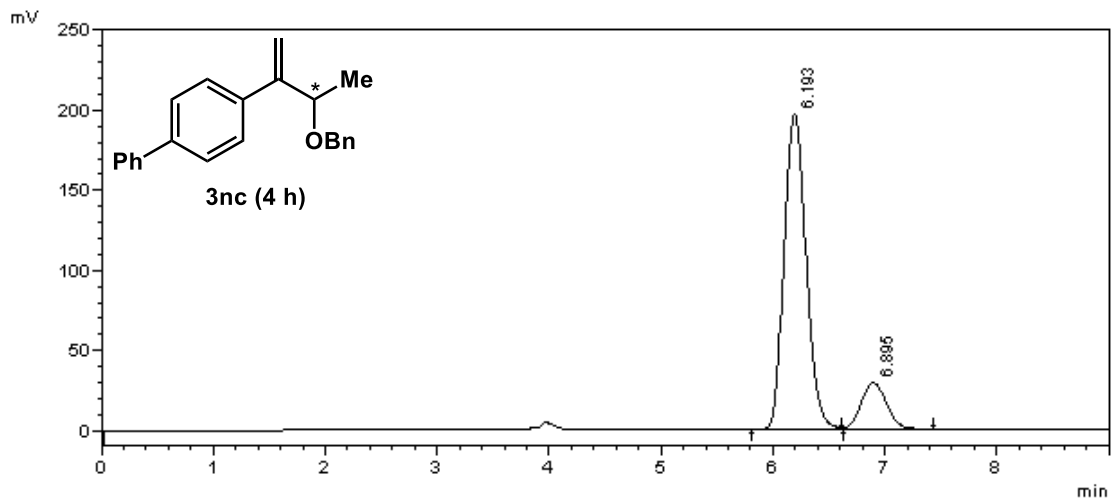

峰表

| 峰# | 保留时间  | 面积      | 高度     | 面积 %   |
|----|-------|---------|--------|--------|
| 1  | 6.193 | 2715739 | 197192 | 84.924 |
| 2  | 6.895 | 482118  | 29476  | 15.076 |

Translation of Chinese characters to English:

| Peak | Retention time | Area    | Height | Area % |
|------|----------------|---------|--------|--------|
| 1    | 6.193          | 1715739 | 197192 | 84.924 |
| 2    | 6.895          | 482118  | 29476  | 15.076 |

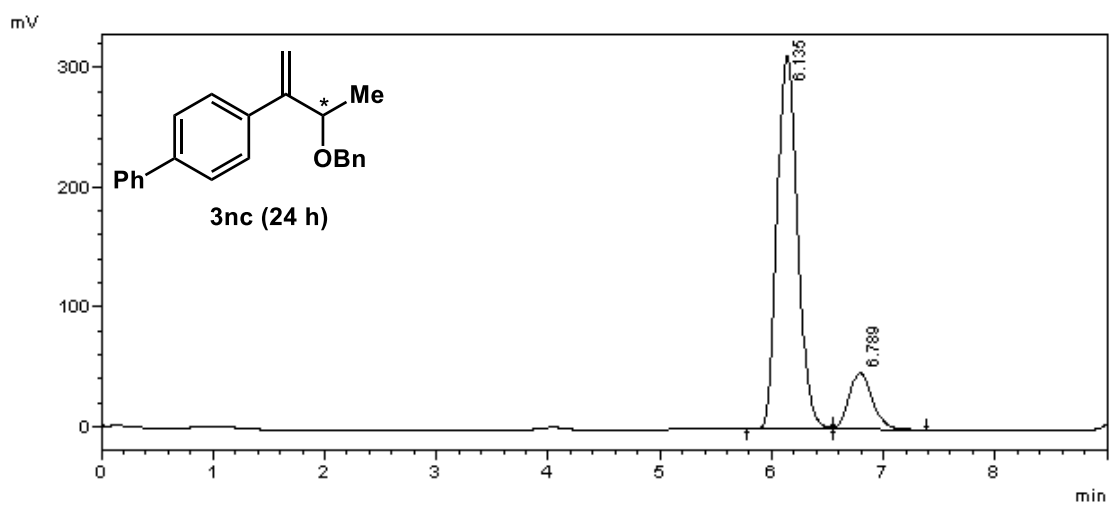

峰表

| 峰# | 保留时间  | 面积      | 高度     | 面积 %   |
|----|-------|---------|--------|--------|
| 1  | 6.135 | 4009586 | 311455 | 85.318 |
| 2  | 6.789 | 689990  | 46830  | 14.682 |

Translation of Chinese characters to English:

| Peak | Retention time | Area    | Height | Area % |
|------|----------------|---------|--------|--------|
| 1    | 6.135          | 4009586 | 311455 | 85.318 |
| 2    | 6.789          | 689990  | 46830  | 14.682 |

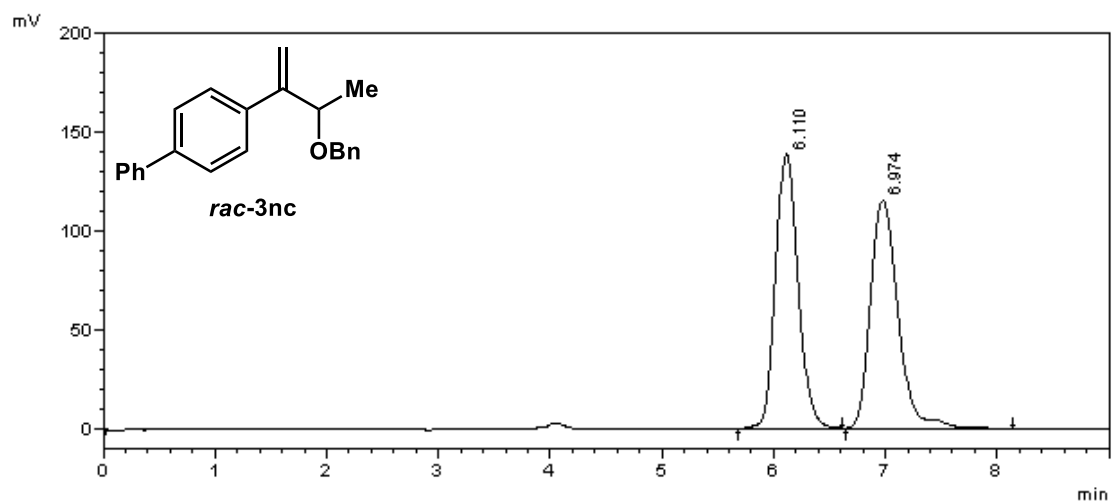

峰表

| 峰# | 保留时间  | 面积      | 高度     | 面积 %   |
|----|-------|---------|--------|--------|
| 1  | 6.110 | 1954245 | 138467 | 49.619 |
| 2  | 6.974 | 1984256 | 114745 | 50.381 |

Translation of Chinese characters to English:

| Peak | Retention time | Area    | Height | Area % |
|------|----------------|---------|--------|--------|
| 1    | 6.110          | 1954245 | 138467 | 49.619 |
| 2    | 6.974          | 1984256 | 114745 | 50.381 |

## 5. References

1. Pünner, F.; Schmidt, A.; Hilt, G. Corrigendum: Up the Hill: Selective Double-Bond Isomerization of Terminal 1,3-Dienes towards *Z*-1,3-Dienes or *2Z,4E*-Dienes. *Angew. Chem. Int. Ed.* **2019**, *58*, 17103.
2. Li, M.-M.; Cheng, L.; Xiao, L.-J.; Xie, J.-H.; Zhou, Q.-L. Palladium-Catalyzed Asymmetric Hydrosulfonylation of 1,3-Dienes with Sulfonyl Hydrazides. *Angew. Chem. Int. Ed.* **2021**, *60*, 2948.
3. Dongbang, S.; Ellman, J. A. Synthesis of Nitrile Bearing Acyclic Quaternary Centers through Co(III)-Catalyzed Sequential C–H Bond Addition to Dienes and *N*-Cyanosuccinimide. *Angew. Chem. Int. Ed.* **2021**, *60*, 2135.
4. Malkov, A. V.; Baxendale, I. R.; Dvořák, D.; Mansfield, D. J.; Kočovský, P. Molybdenum(II)- and Tungsten(II)-Catalyzed Allylic Substitution. *J. Org. Chem.* **1999**, *64*, 2737.
5. Tan, J.; Zhang, Z.; Wang, Z. A Novel Palladium-Catalyzed Hydroalkoxylation of Alkenes with A Migration of Double Bond. *Org. Biomol. Chem.* **2008**, *6*, 1344.
6. Ouyang, L.; Xia, Y.; Miao, R.; Liao, J.; Luo, R. Iridium-Catalyzed Reductive Etherification of  $\alpha,\beta$ -Unsaturated Ketones and Aldehydes with Alcohols. *Org. Biomol. Chem.* **2022**, *20*, 2621.
7. Aggarwal, S. K.; Bradshaw, J. S.; Eguchi, M.; Parry, S.; Rossiter, B. E.; Markides, K. E.; Lee, M. L. New Chiral Polysiloxanes Prepared from Derivatives of (+)- or (-)-2-phenyl-3-butenoic Acid, (r)-1-hepten-3-ol and (r)-1-cyclohexyl-2-propen-1-ol. *Tetrahedron* **1987**, *43*, 451.
8. Tran, G.; Mazet, C. Ni-Catalyzed Regioselective Hydroalkoxylation of Branched 1,3-Dienes. *Org. Lett.* **2019**, *21*, 9124.
9. Feng, B.; Cheng, H.-G.; Chen, J.-R.; Deng, Q.-H.; Lu, L.-Q.; Xiao, W.-J. Palladium/Sulfoxide–Phosphine-Catalyzed Highly Enantioselective Allylic Etherification and Amination. *Chem. Commun.* **2014**, *50*, 9550.
10. Biswas, S.; Samec, J. S. M. The Efficiency of the Metal Catalysts in the Nucleophilic Substitution of Alcohols is Dependent on the Nucleophile and Not on the Electrophile. *Chem. Asian J.* **2013**, *8*, 974.

11. a) Nielsen, C. D.-T.; Burés, J. Visual Kinetic Analysis. *Chem. Sci.* **2019**, *10*, 348; b) Burés, J. Variable Time Normalization Analysis: General Graphical Elucidation of Reaction Orders from Concentration Profiles. *Angew. Chem. Int. Ed.* **2016**, *55*, 16084.
12. Brunker, T. J.; Blank, N. F.; Moncarz, J. R.; Scriban, C.; Anderson, B. J.; Glueck, D. S.; Zakharov, L. N.; Golen, J. A.; Sommer, R. D.; Incarvito, C. D.; Rheingold, A. L. Chiral Palladium(0) *trans*-Stilbene Complexes: Synthesis, Structure, and Oxidative Addition of Phenyl Iodide. *Organometallics* **2005**, *24*, 2731.
13. Wang, W.; He, S.; Zhong, Y.; Chen, J.; Cai, C.; Luo, Y.; Xia, Y. Cobalt-Catalyzed *Z* to *E* Geometrical Isomerization of 1,3-Dienes. *J. Org. Chem.* **2022**, *87*, 4712.

## 6. NMR spectra

### (*S,E*)-(3-methoxybut-1-en-1-yl)benzene (3aa)

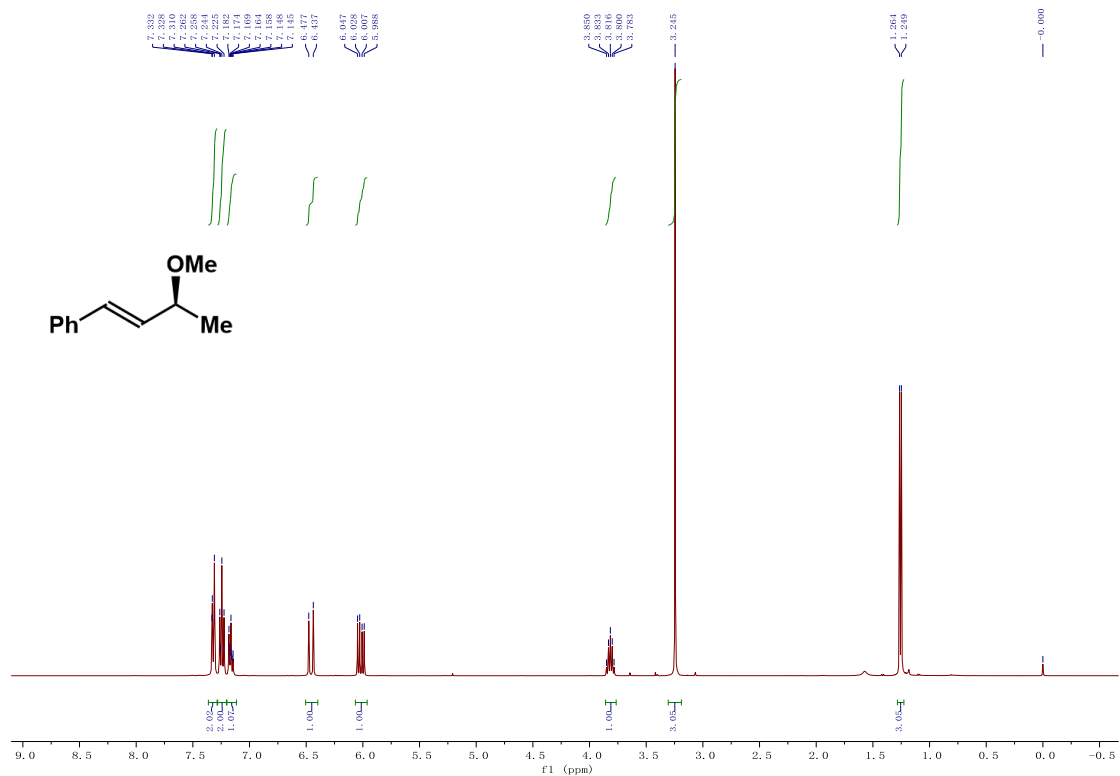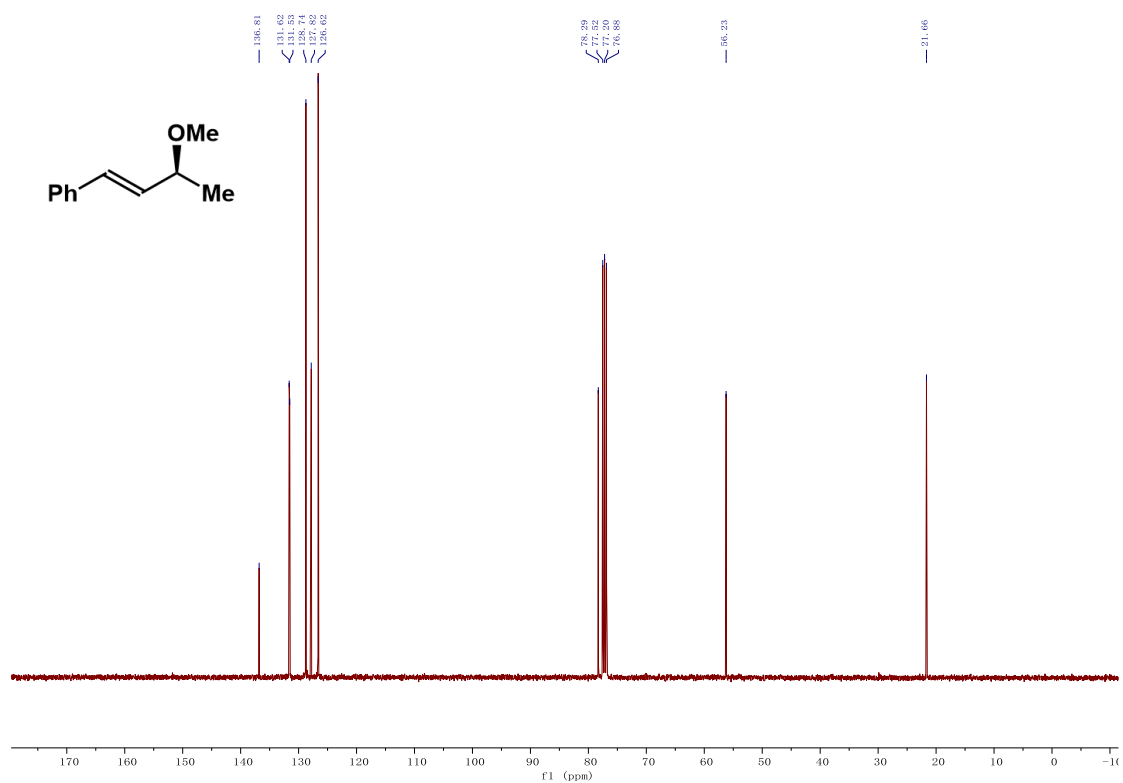

**(S,E)-1-methoxy-4-(3-methoxybut-1-en-1-yl)benzene (3ba)**

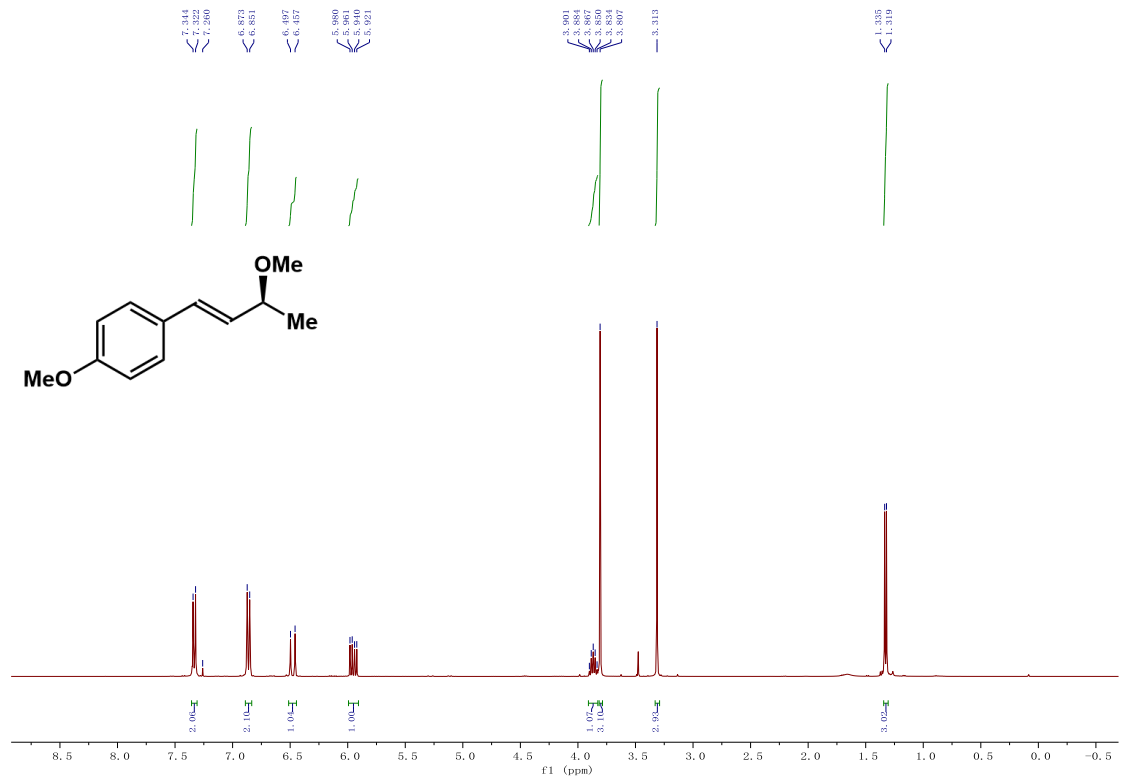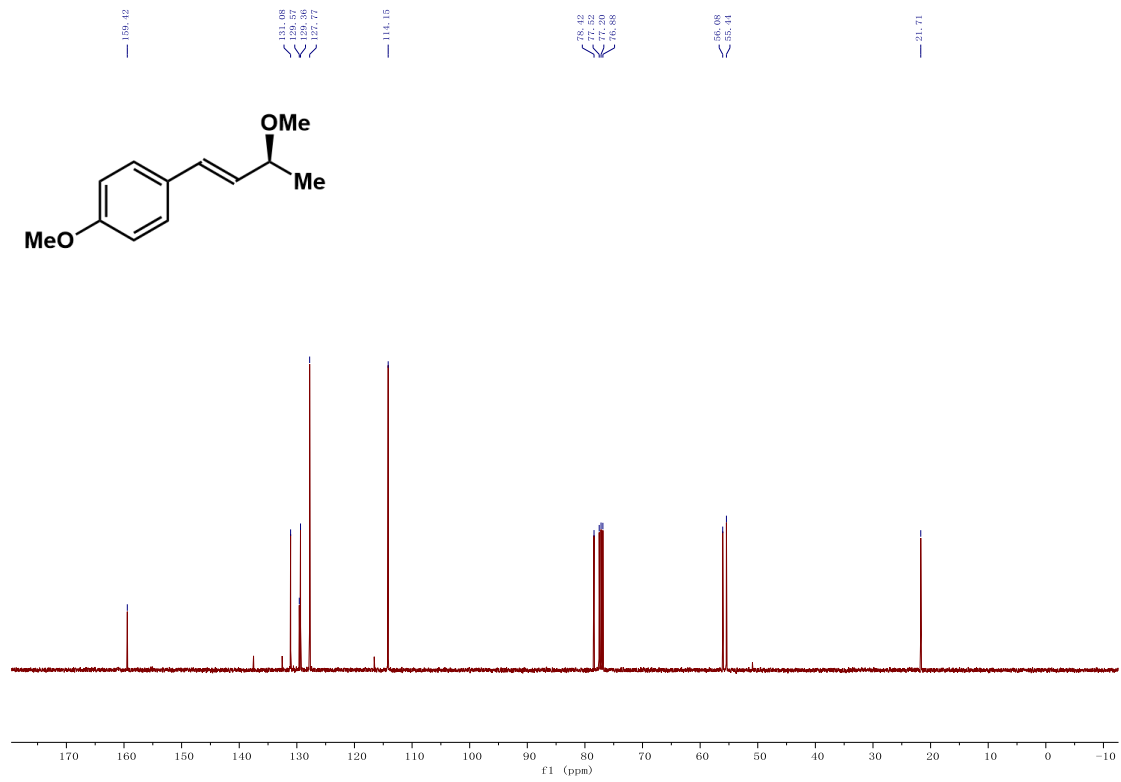

**(*S,E*)-1-(3-methoxybut-1-en-1-yl)-4-methylbenzene (3ca)**

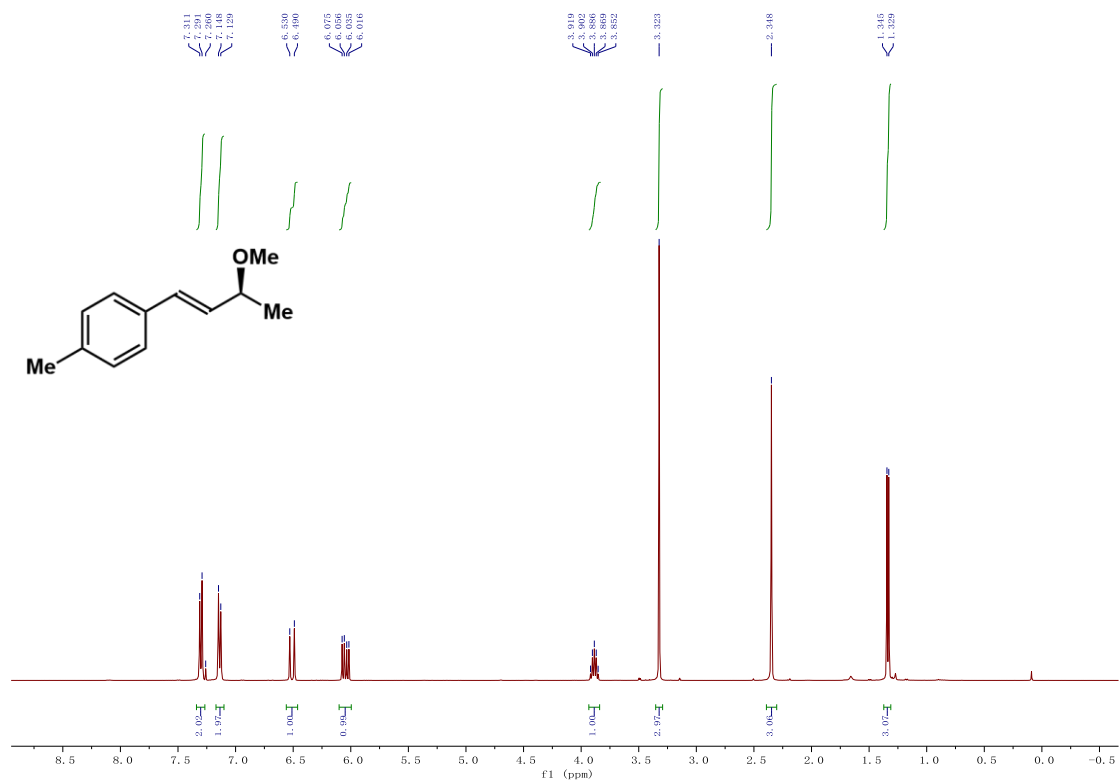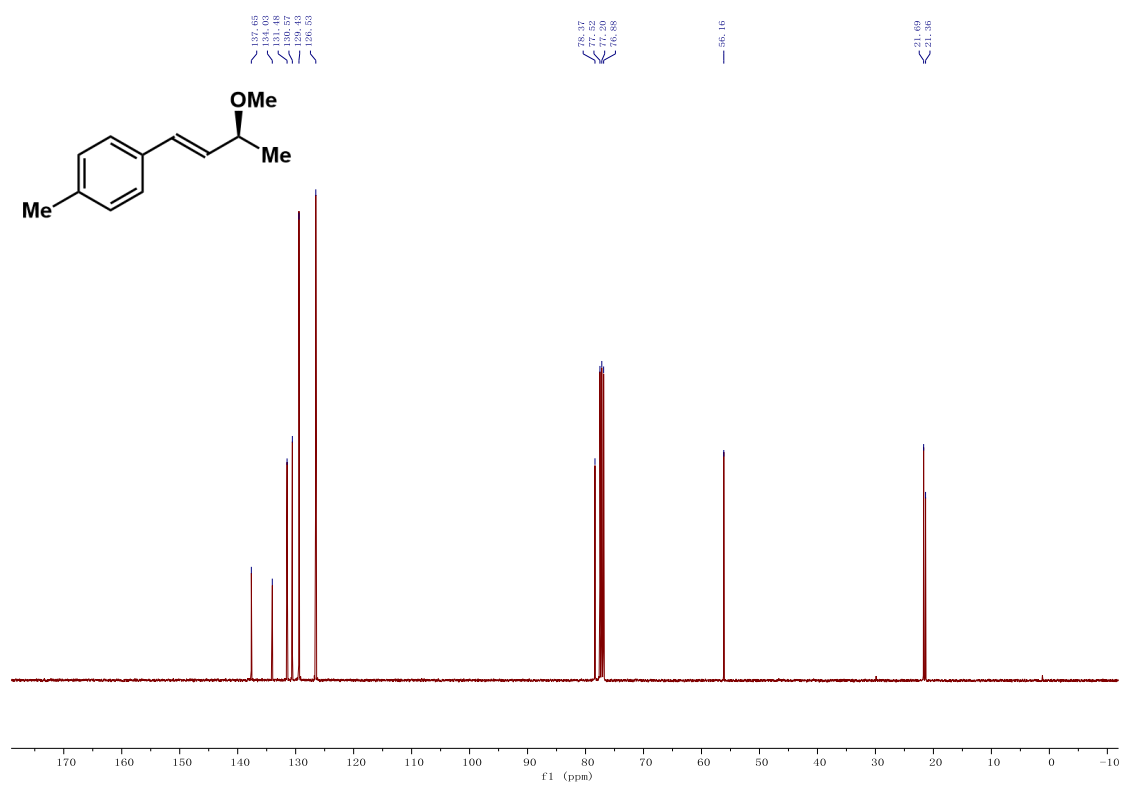

**(S,E)-1-fluoro-4-(3-methoxybut-1-en-1-yl)benzene (3da)**

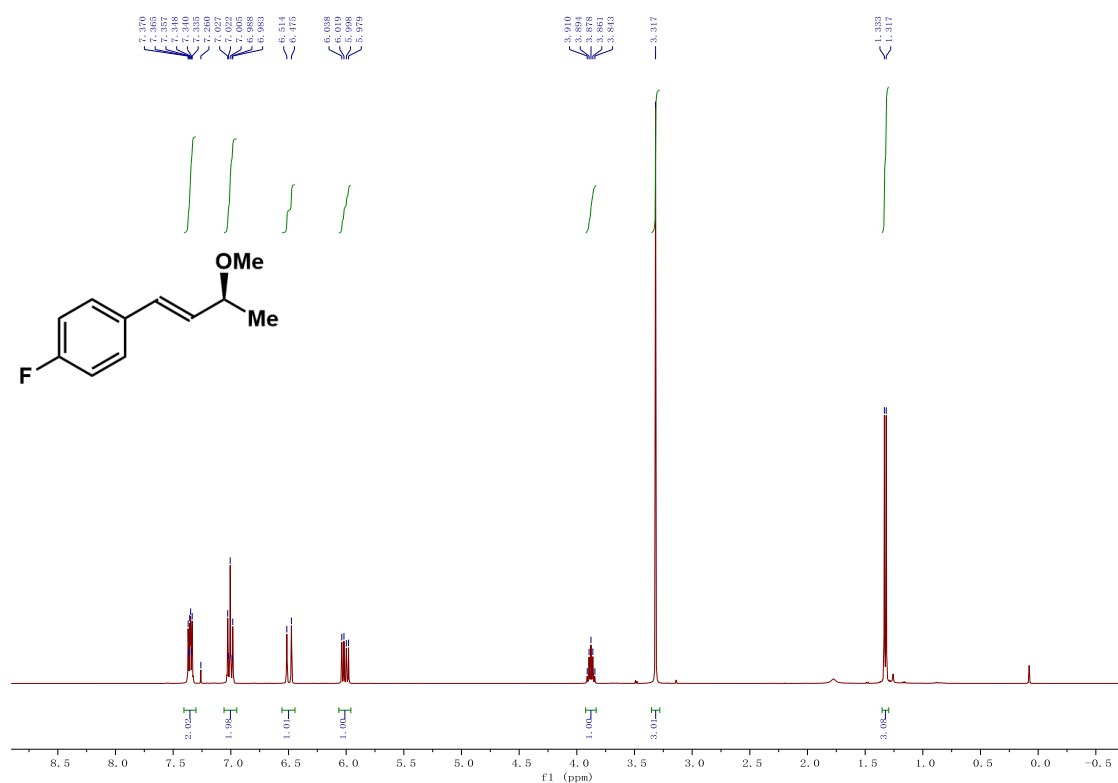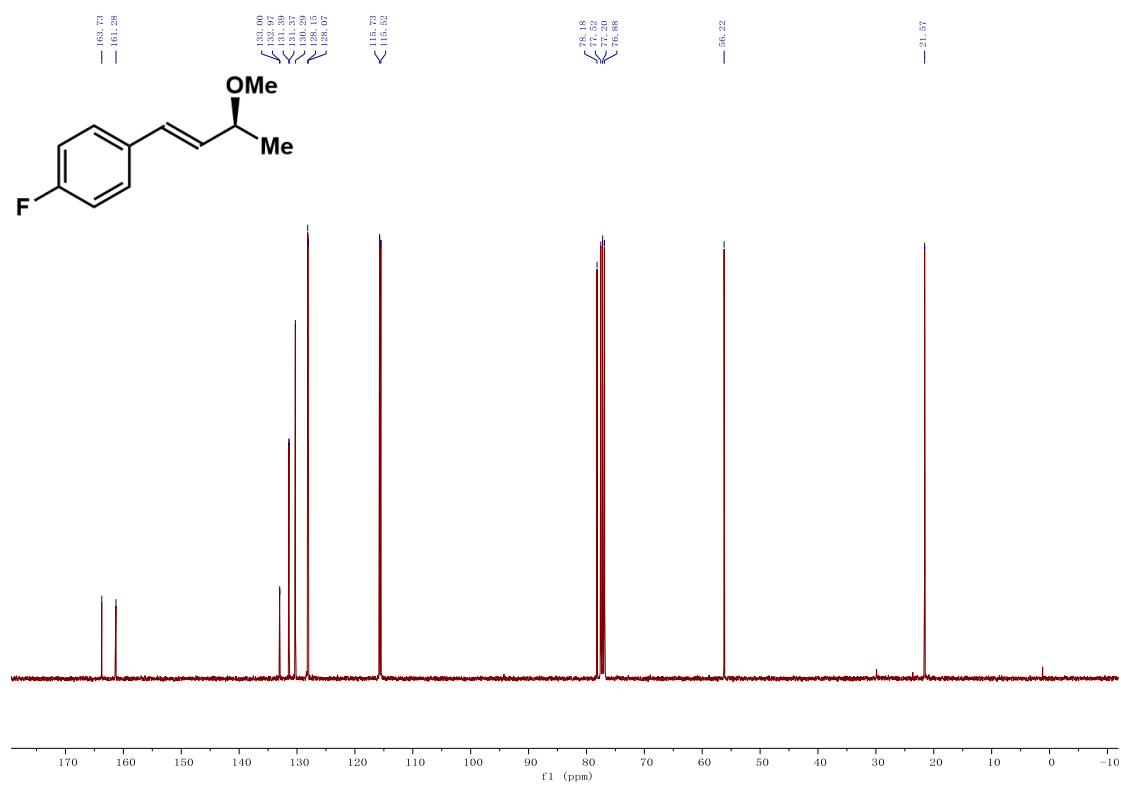



**(S,E)-1-chloro-4-(3-methoxybut-1-en-1-yl)benzene (3ea)**

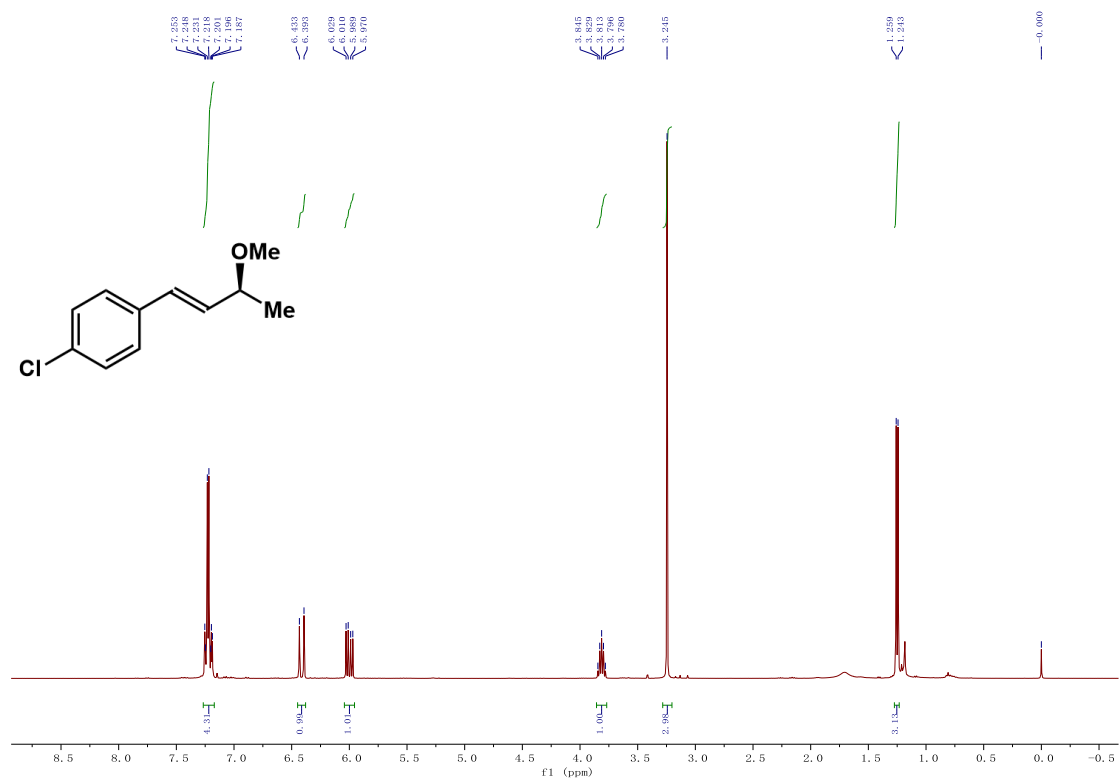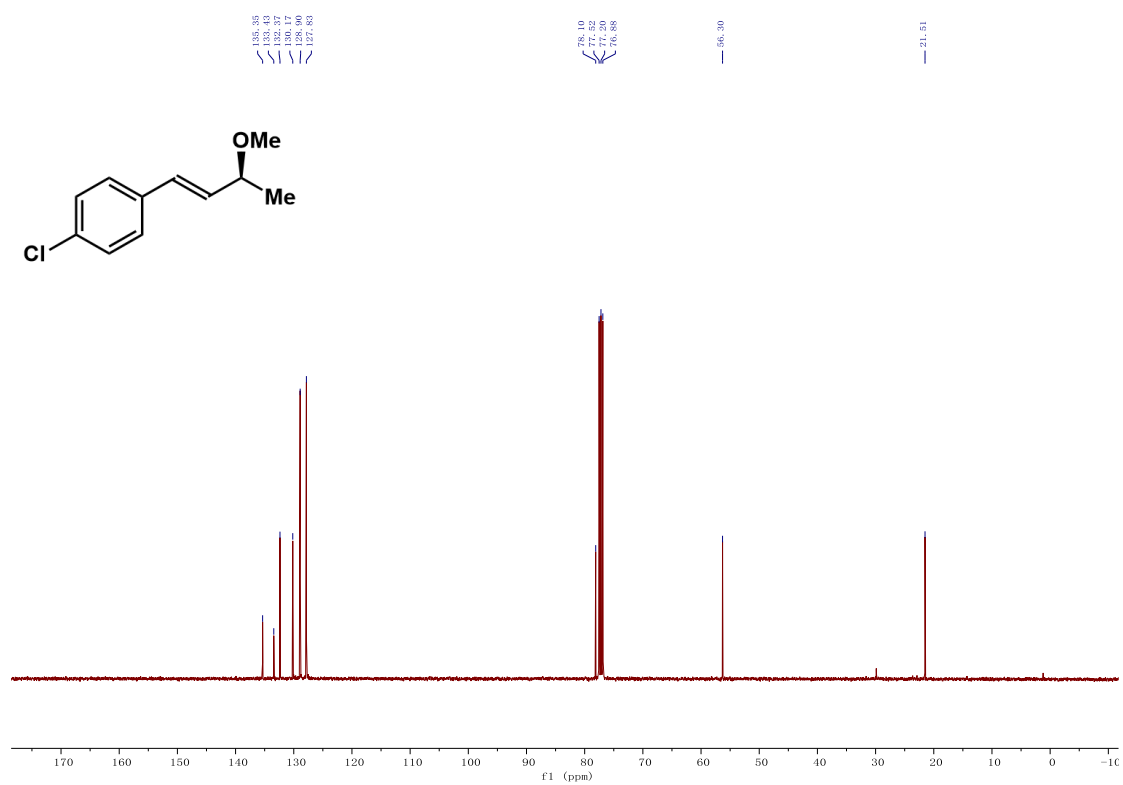

**(*S,E*)-4-(3-methoxybut-1-en-1-yl)-*N,N*-dimethylaniline (3fa)**

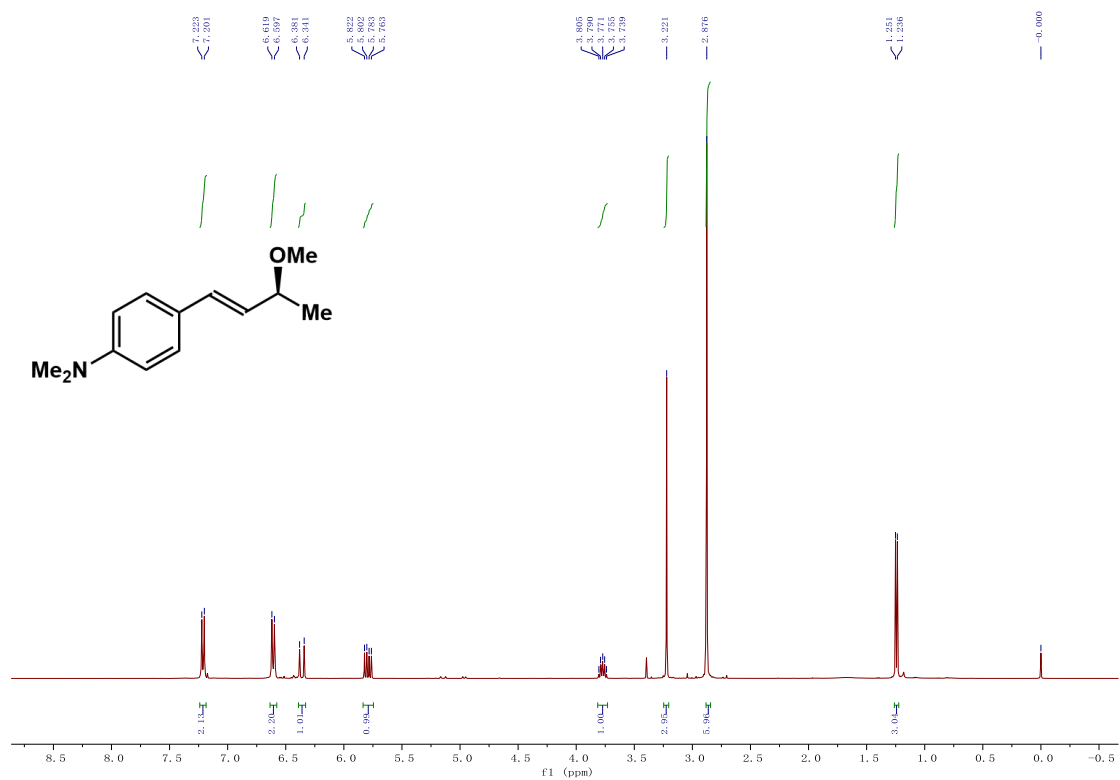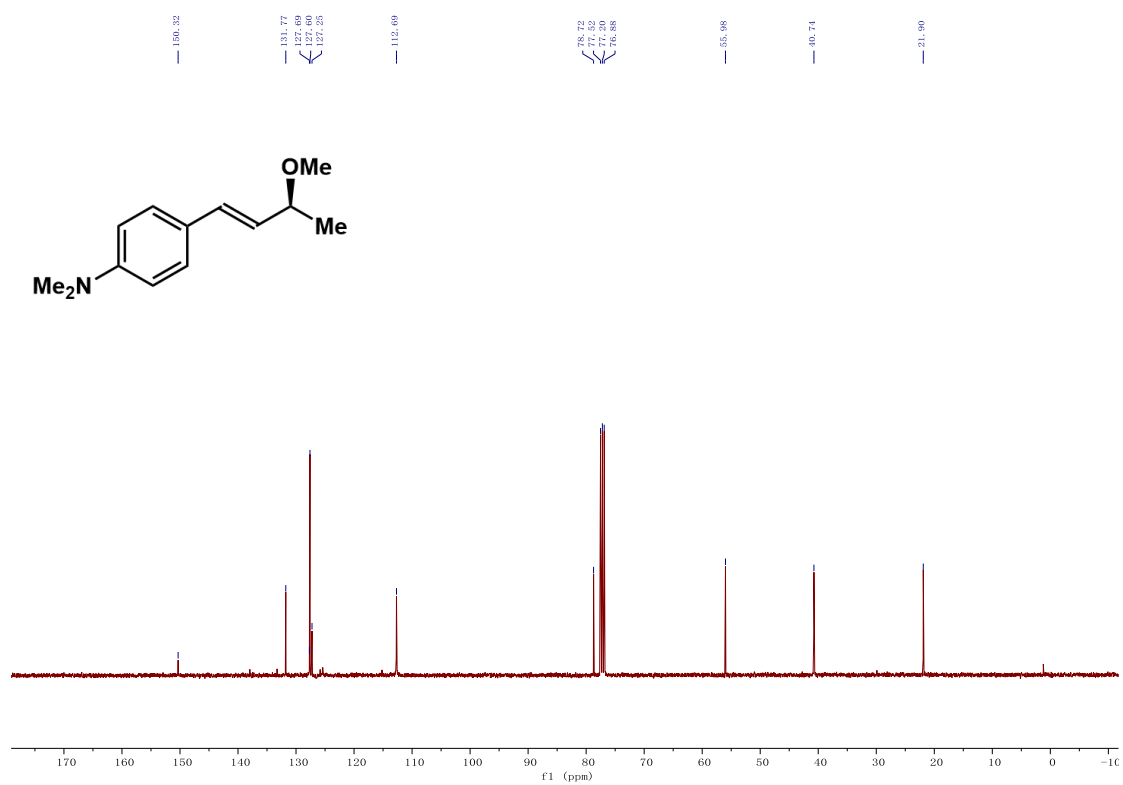

**(*S,E*)-1-(3-methoxybut-1-en-1-yl)-3-methylbenzene (3ga)**

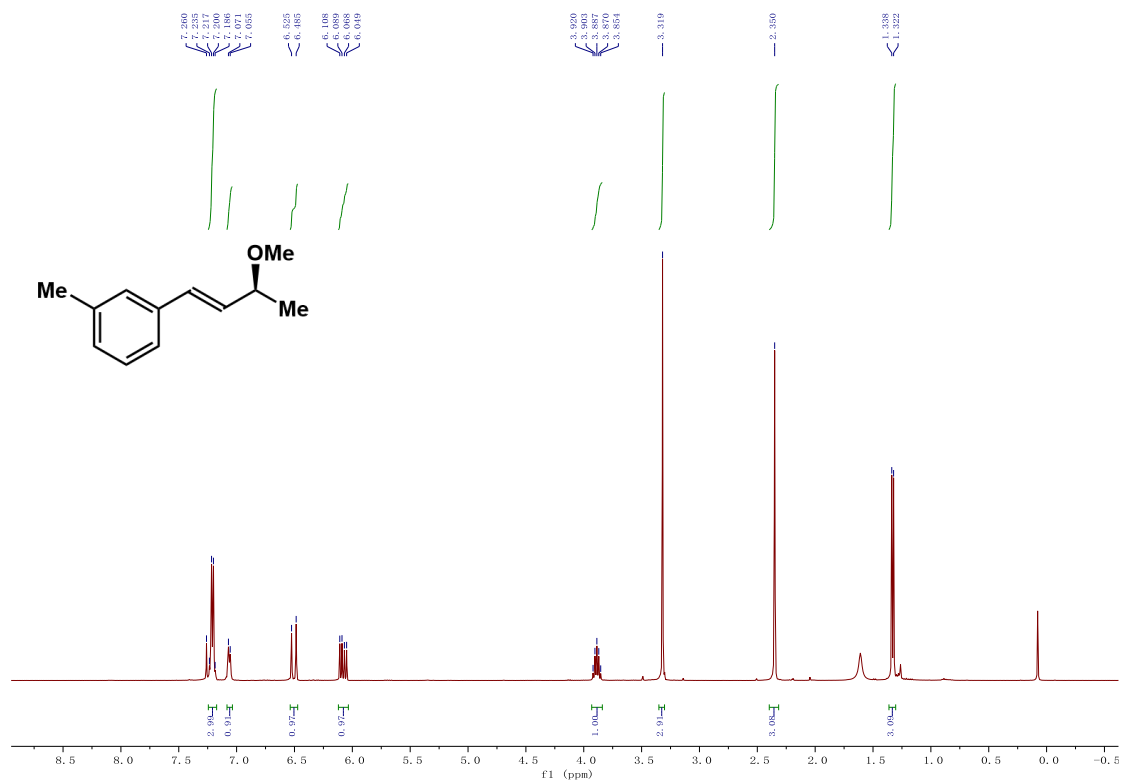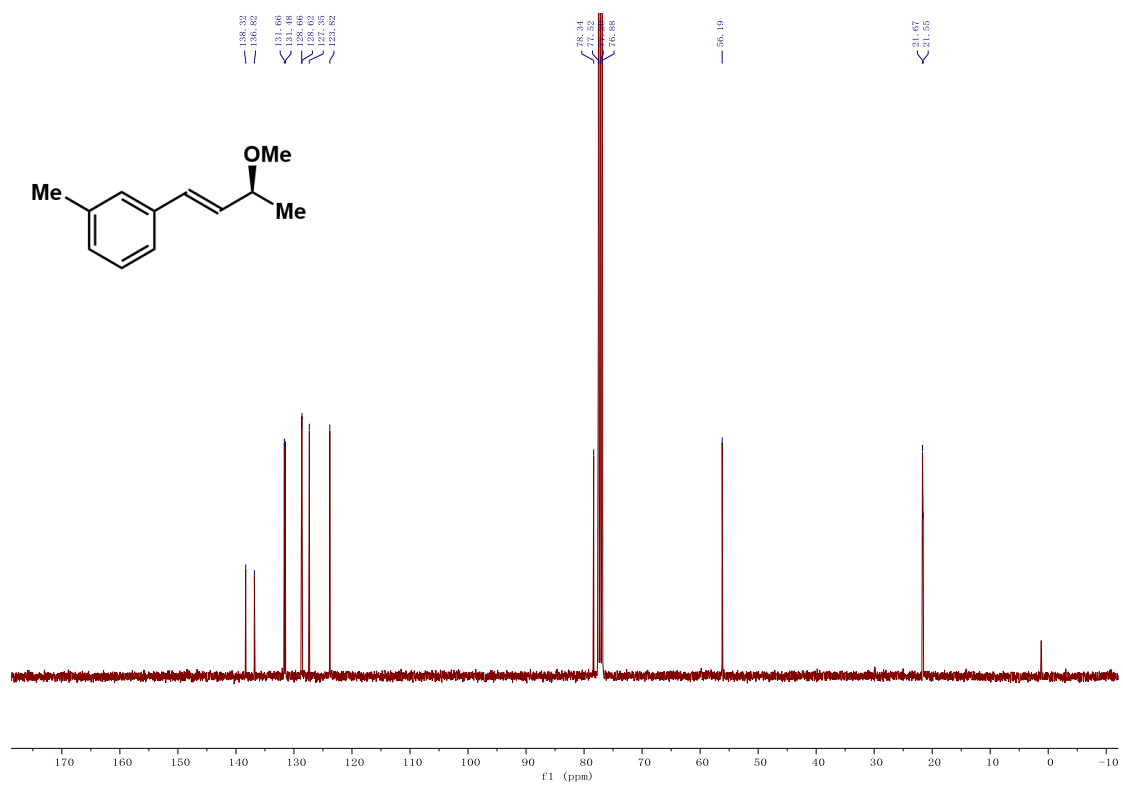

**(*S,E*)-1-methoxy-2-(3-methoxybut-1-en-1-yl)benzene (3ha)**

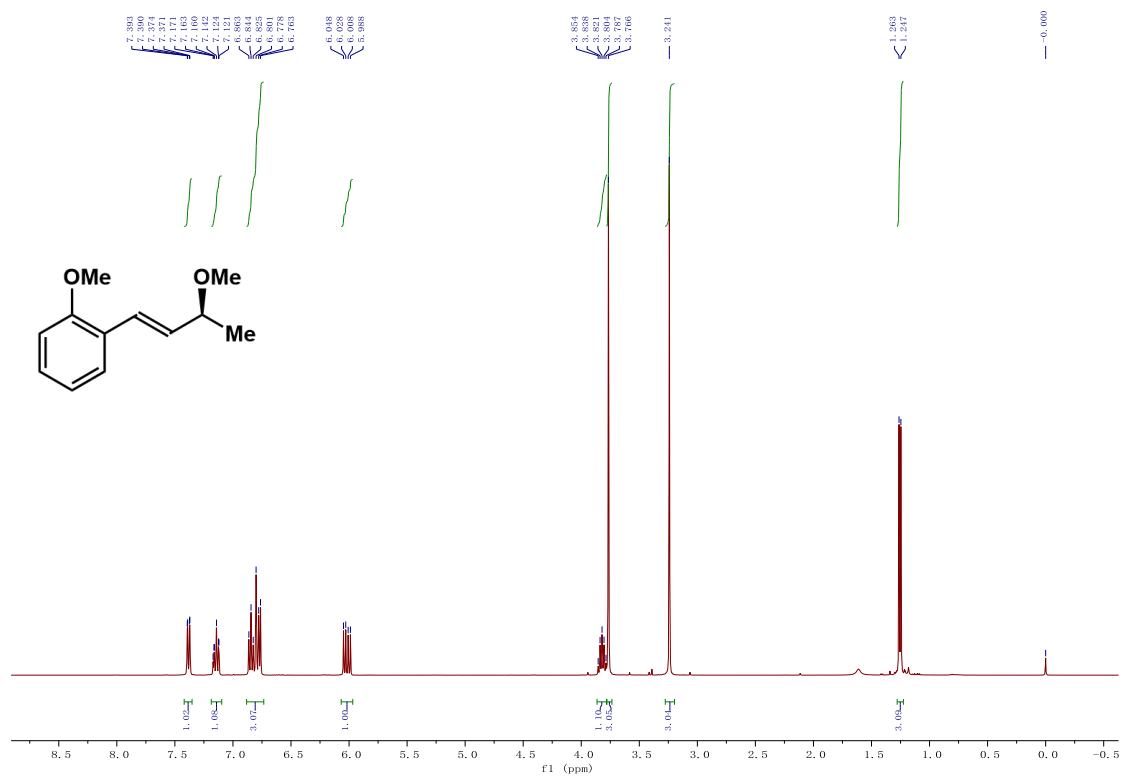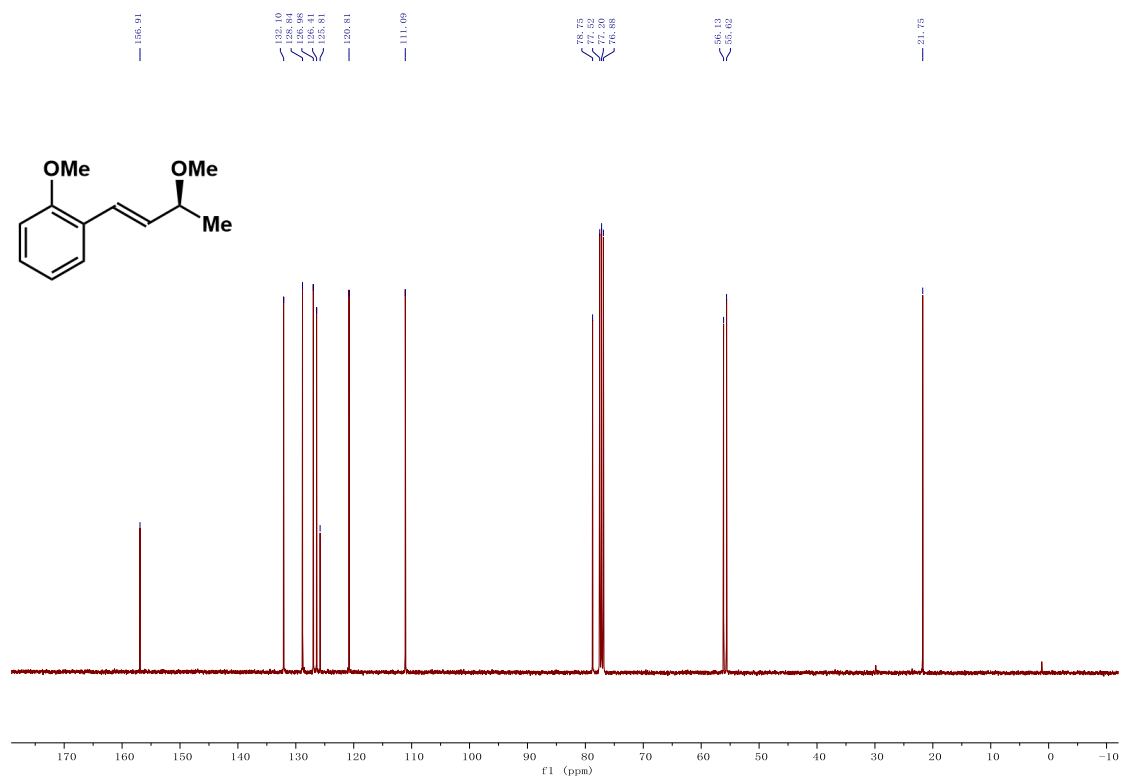

**(*S,E*)-2-(3-methoxybut-1-en-1-yl)furan (3ia)**

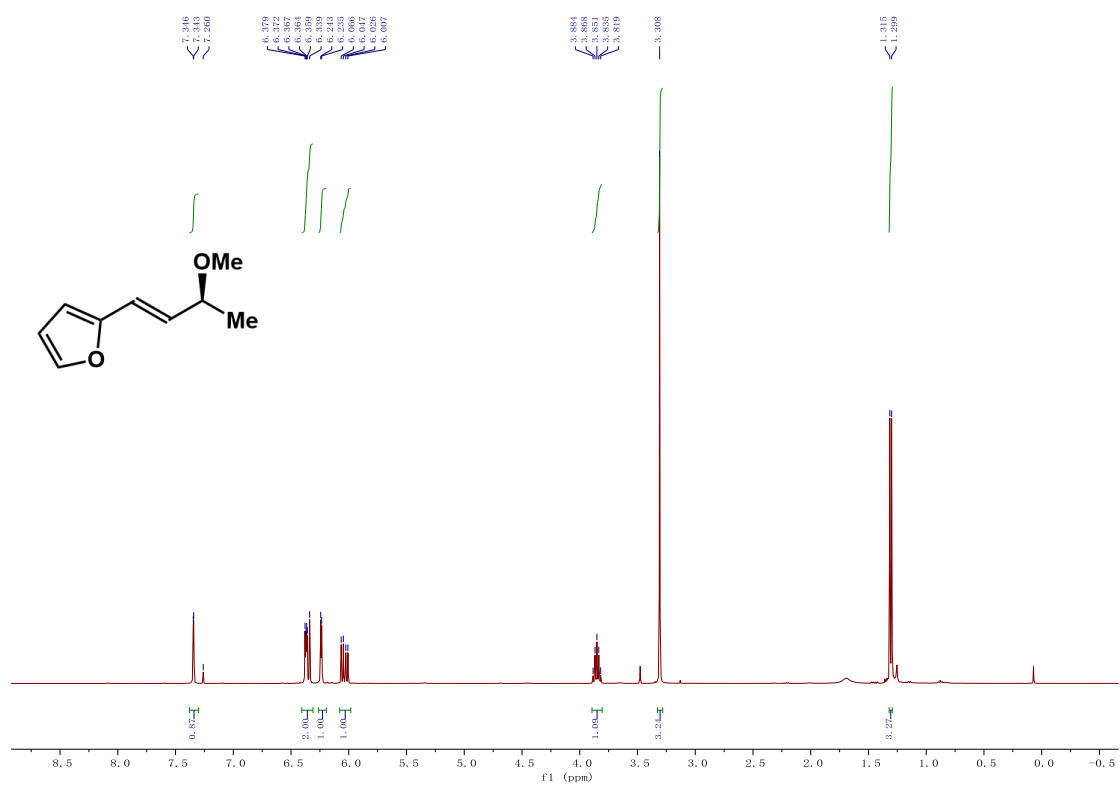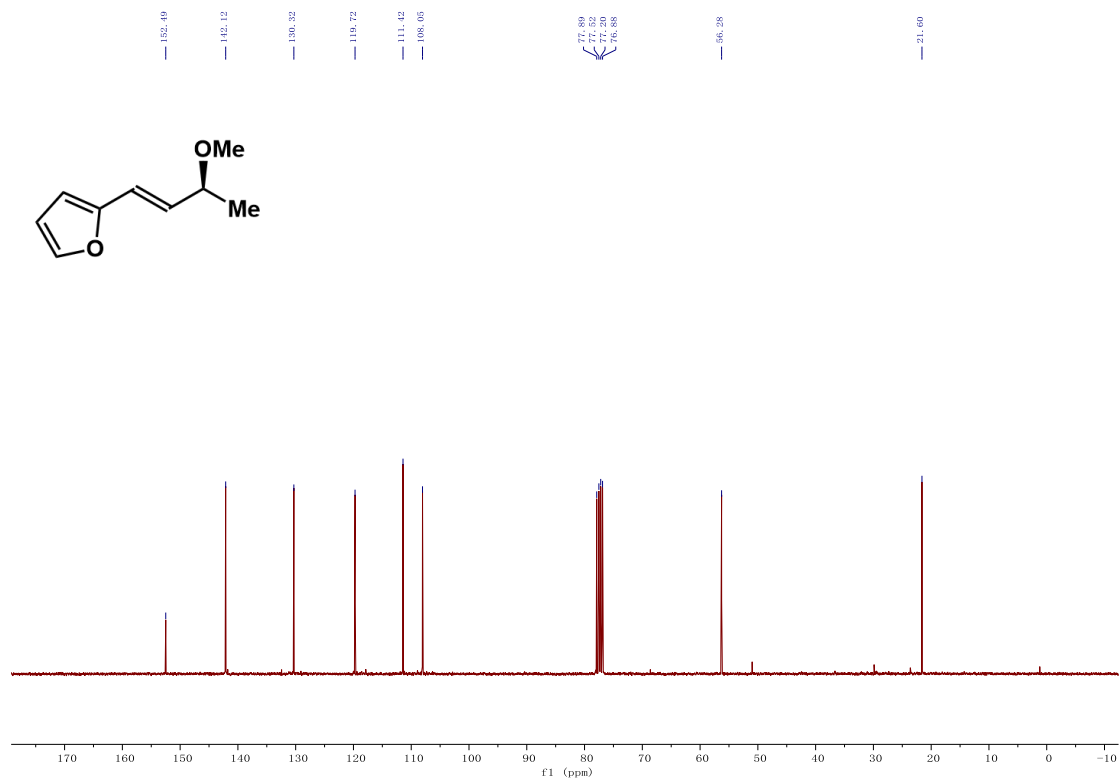

**(*S,E*)-2-(3-methoxybut-1-en-1-yl)thiophene (3ja)**

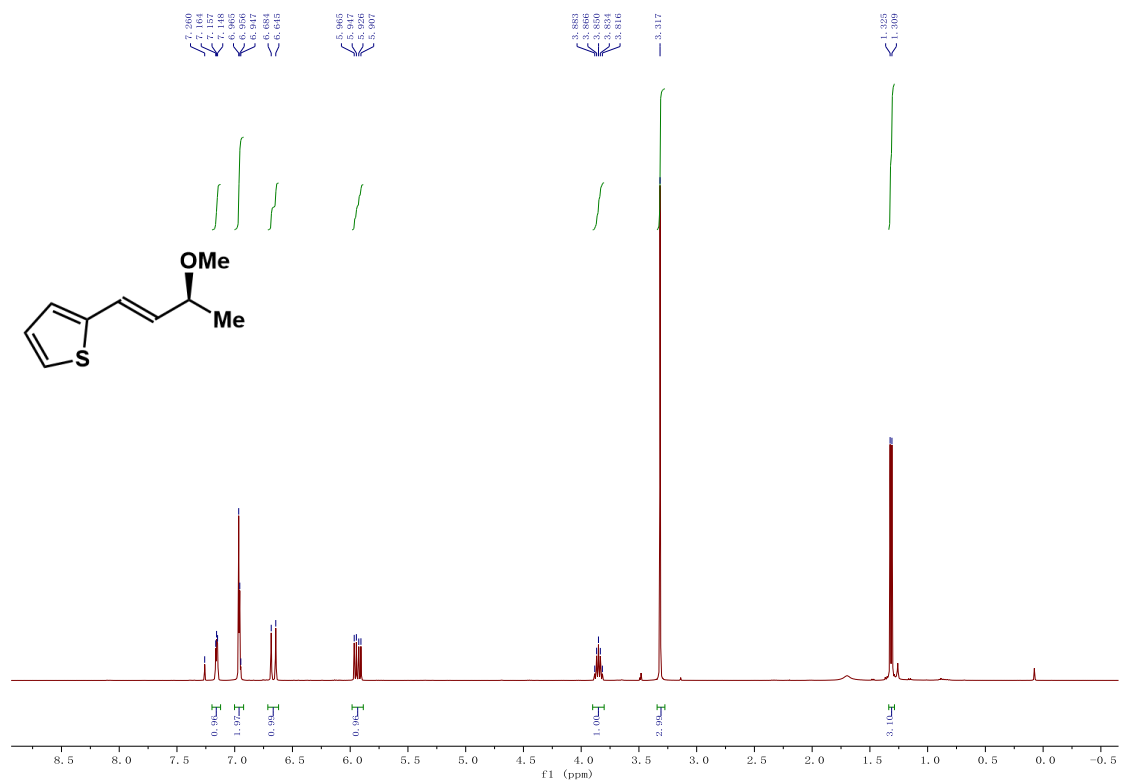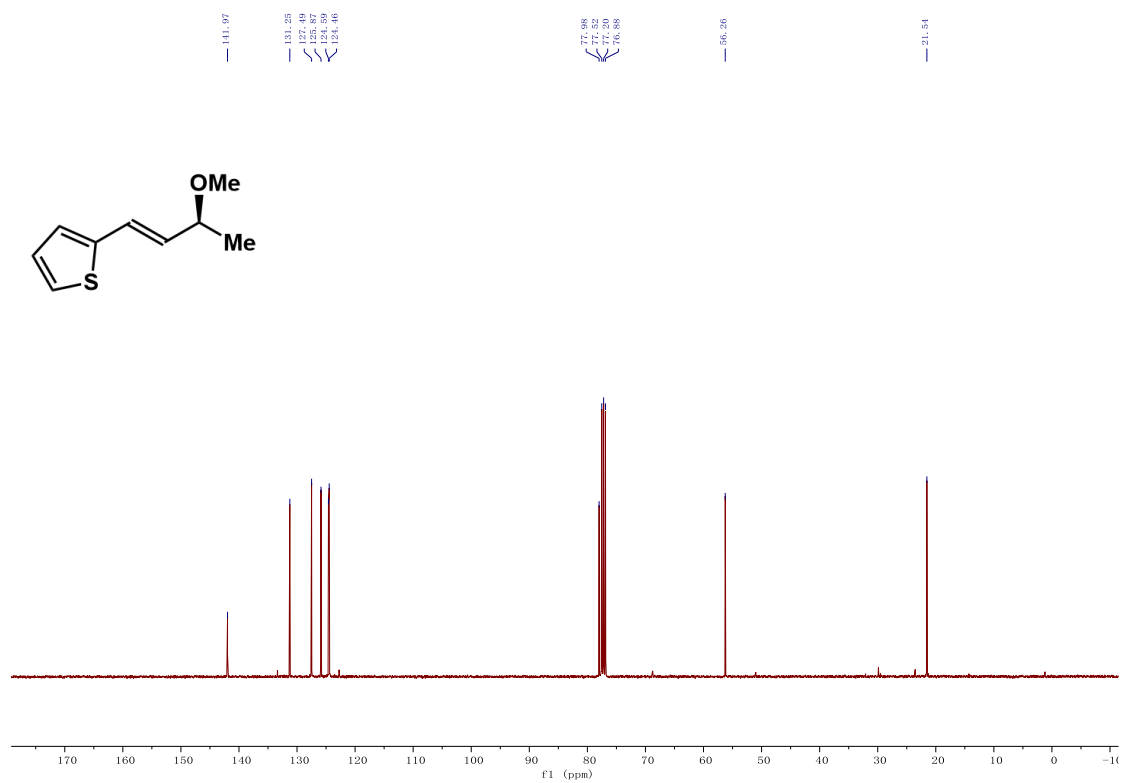

**(*S,E*)-4-(((4-cyclohexylbut-3-en-2-yl)oxy)methyl)-1,1'-biphenyl (3ka)**

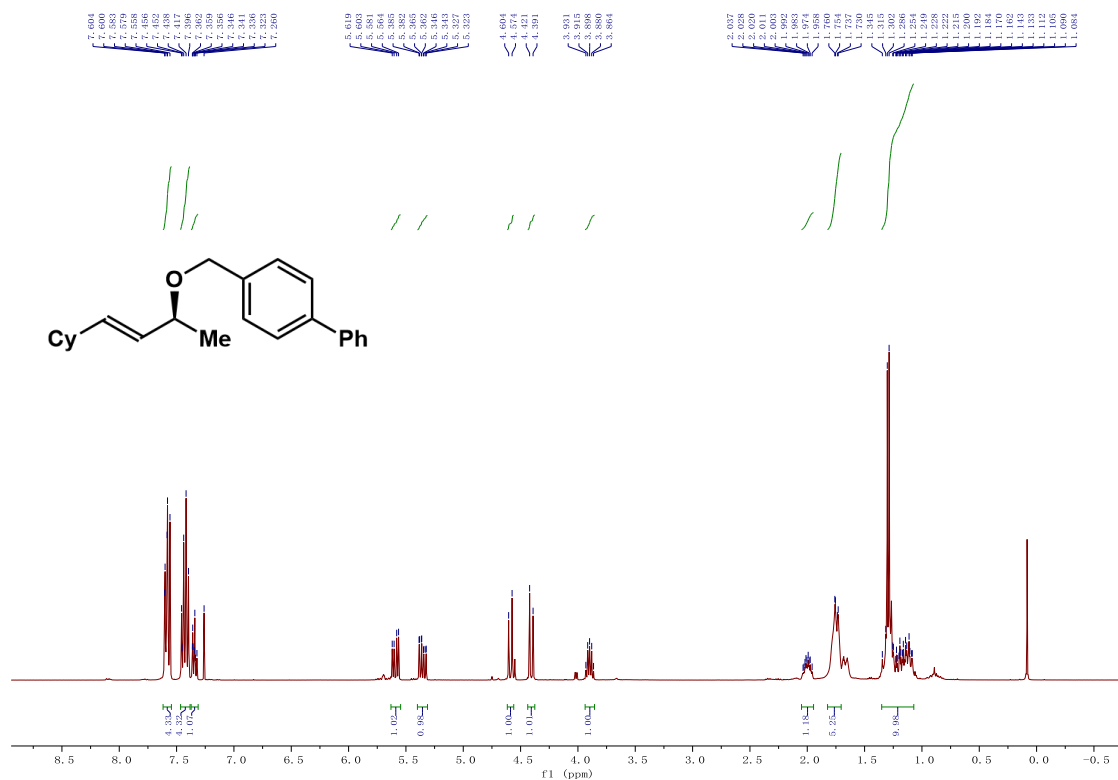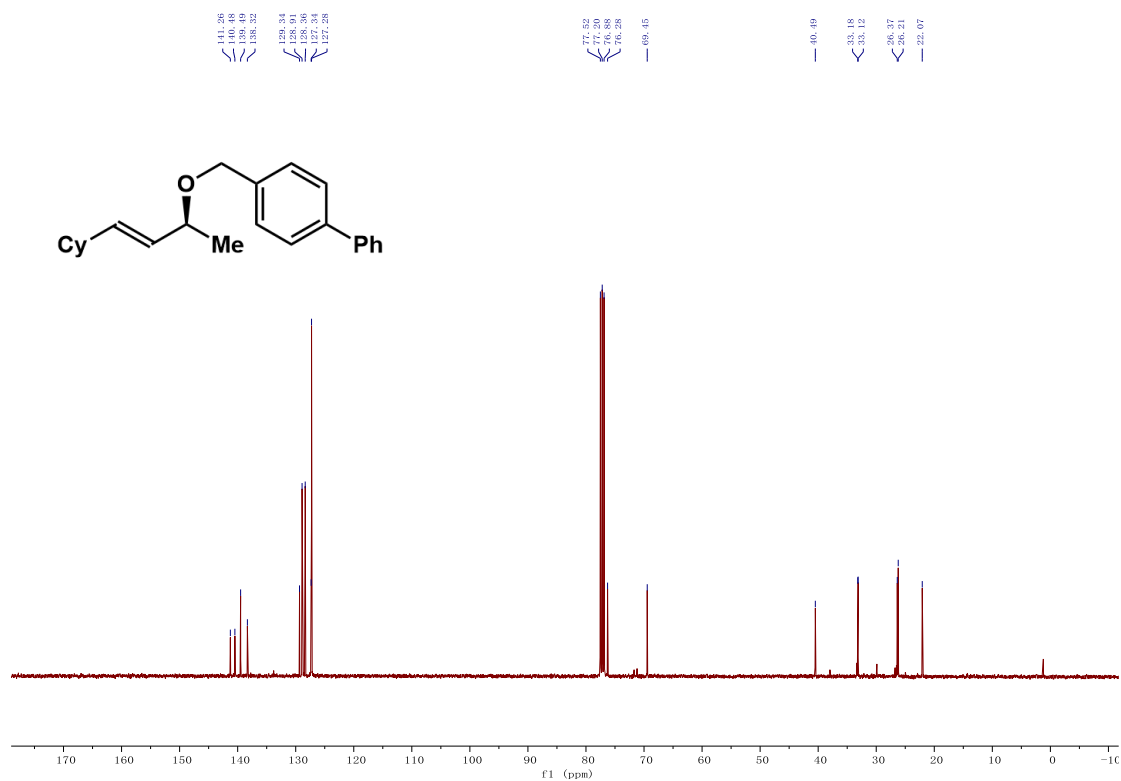

**(S)-4-((but-3-en-2-yloxy)methyl)-1,1'-biphenyl (3la)**

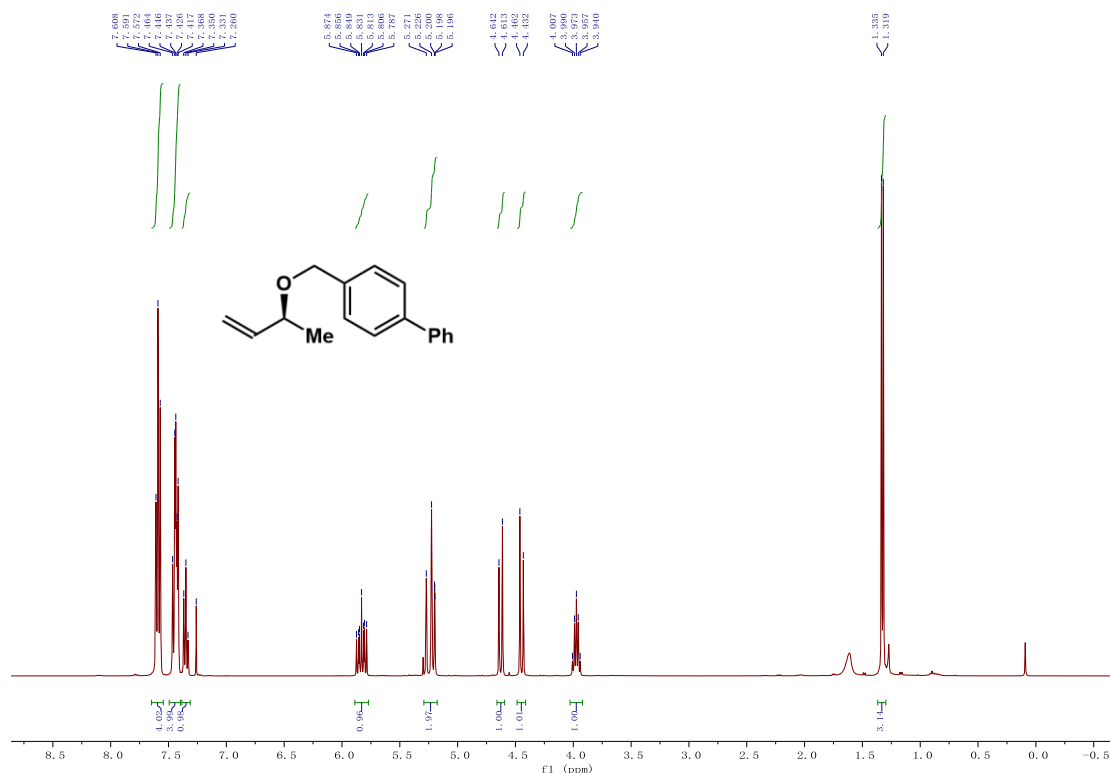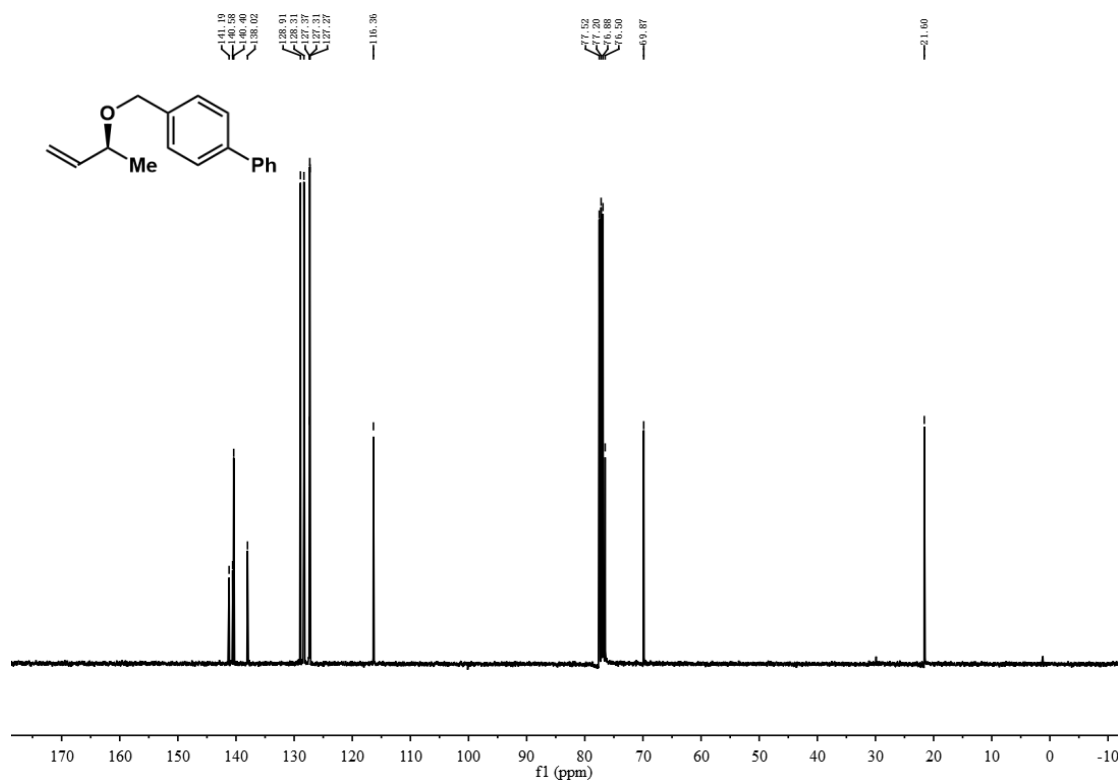



**(S)-(3-methoxybut-1-en-2-yl)benzene (3ma)**

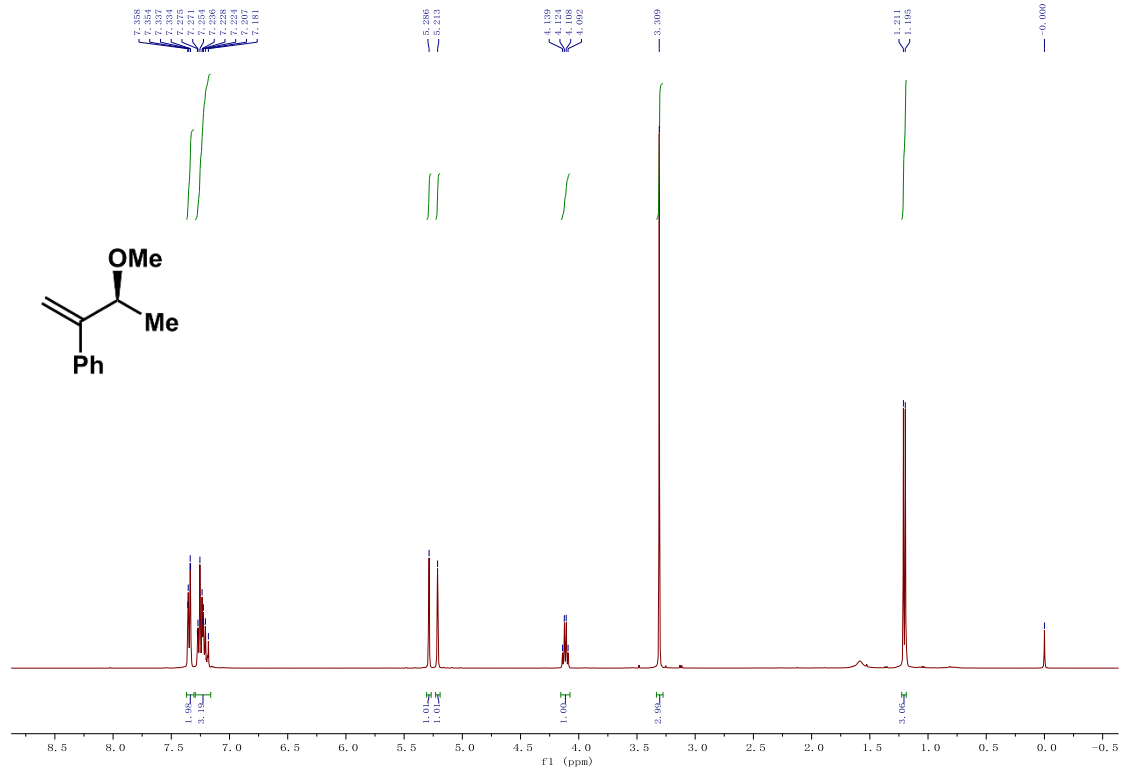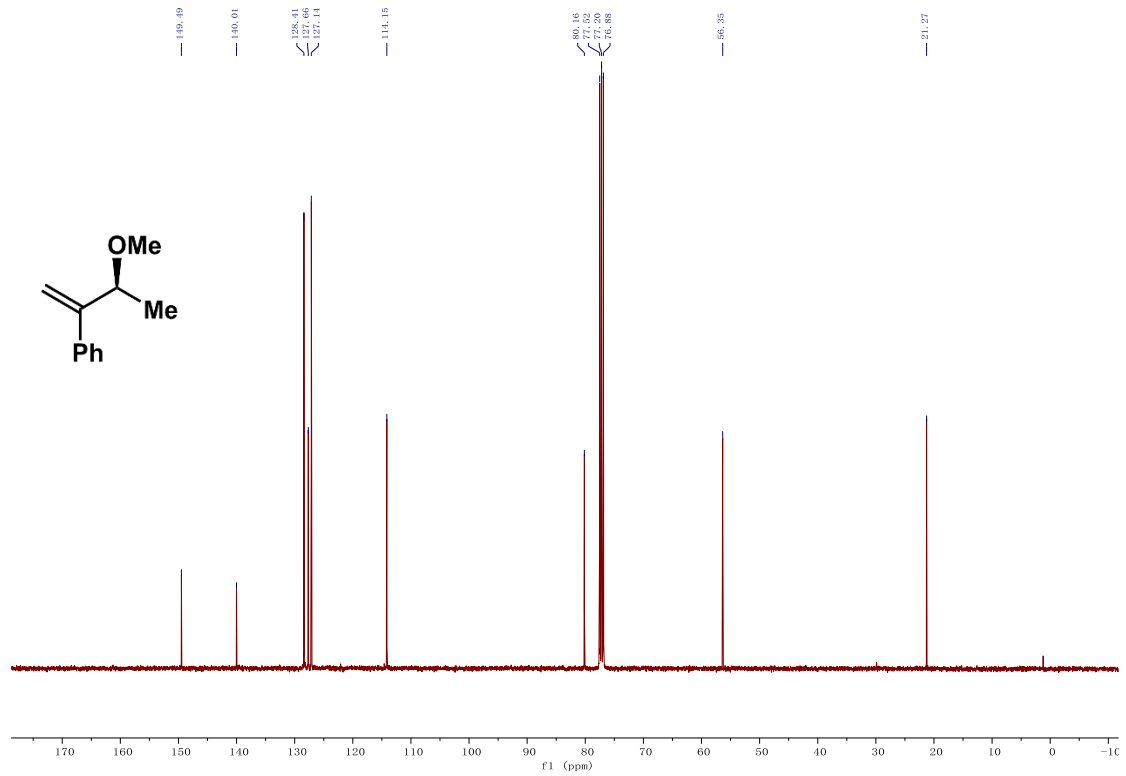

# (*S,E*)-(3-ethoxybut-1-en-1-yl)benzene (3ab)

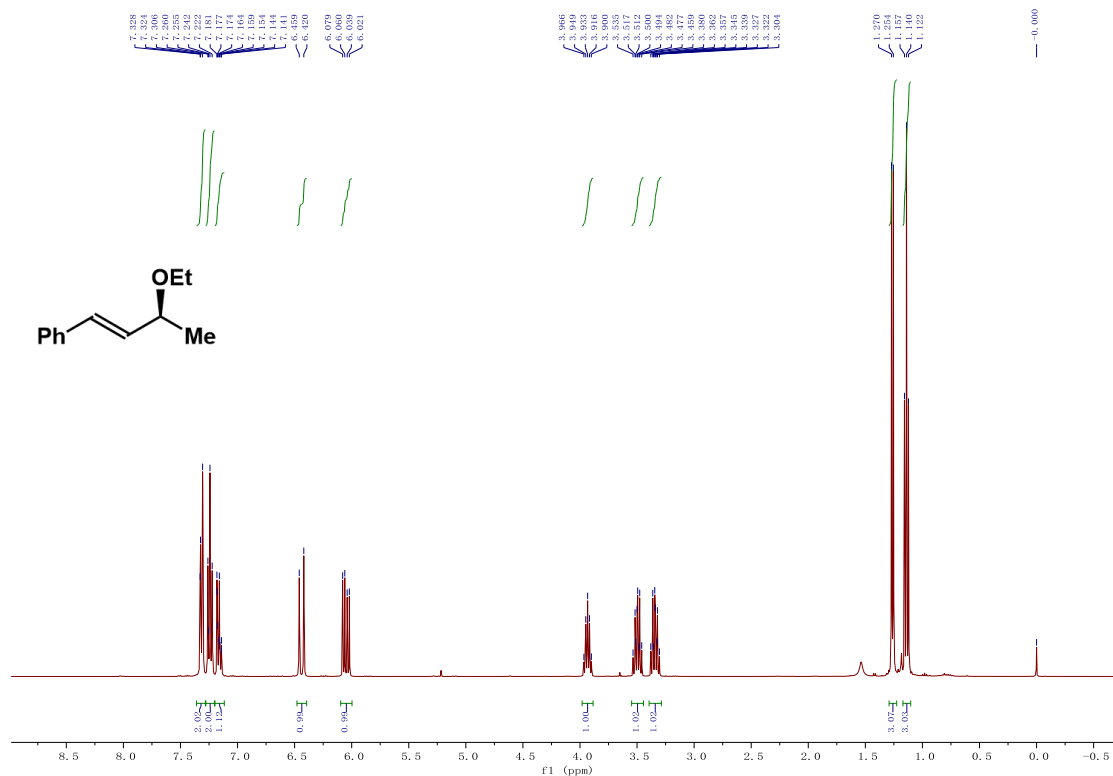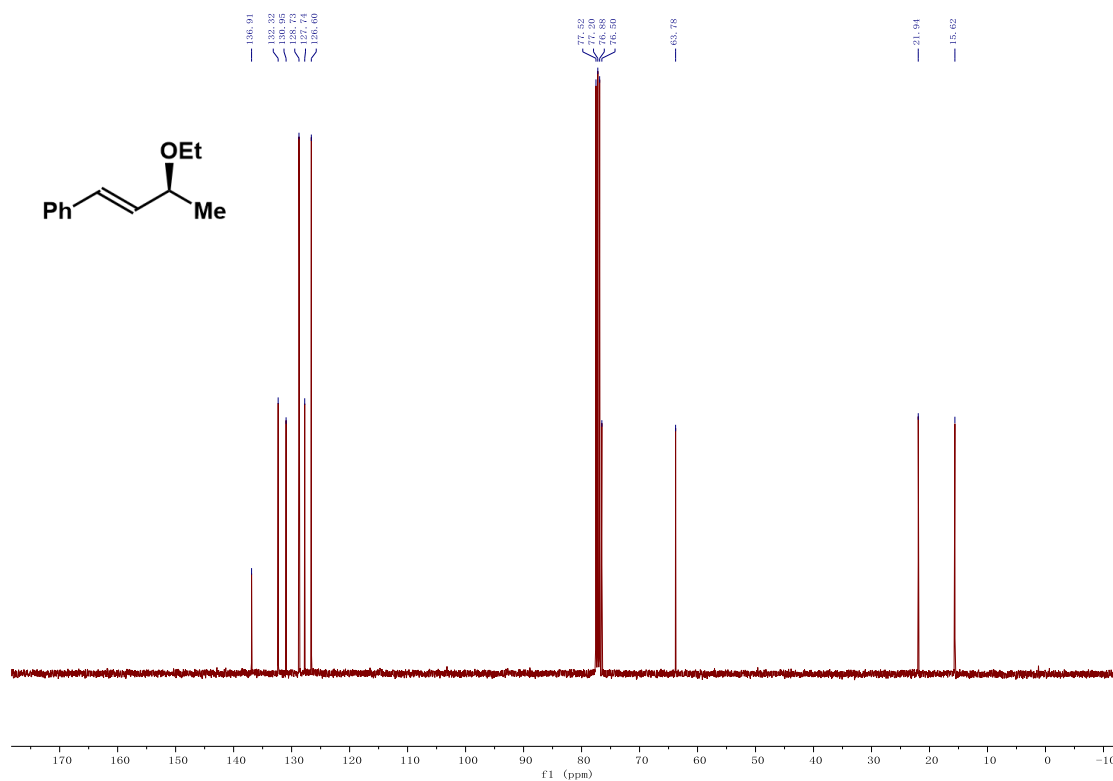

**(*S,E*)-(3-(benzyloxy)but-1-en-1-yl)benzene (3ac)**

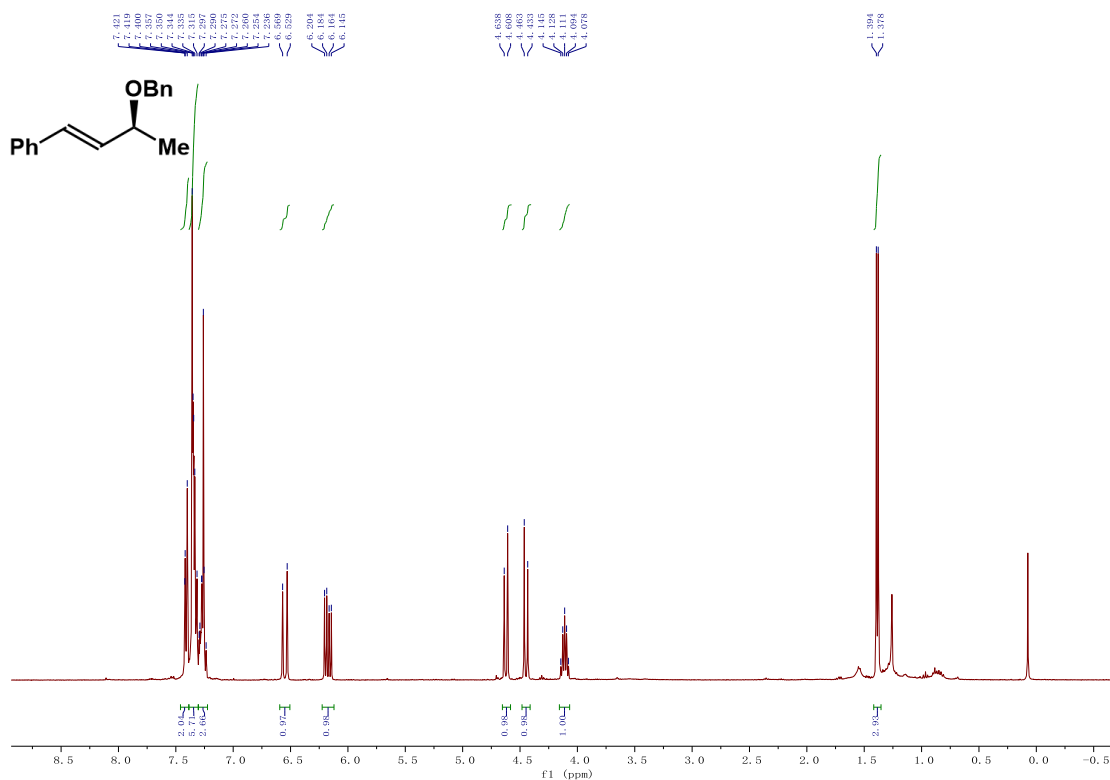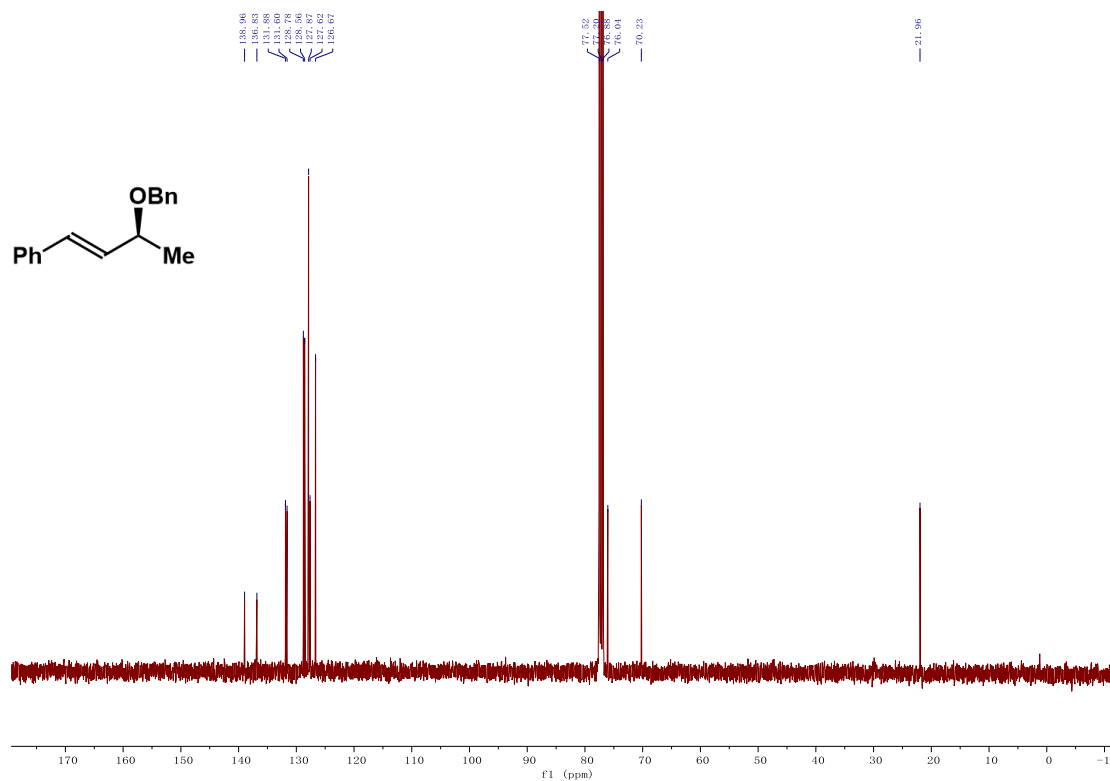

# (*S,E*)-3-((4-phenylbut-3-en-2-yl)oxy)propylbenzene (3ad)

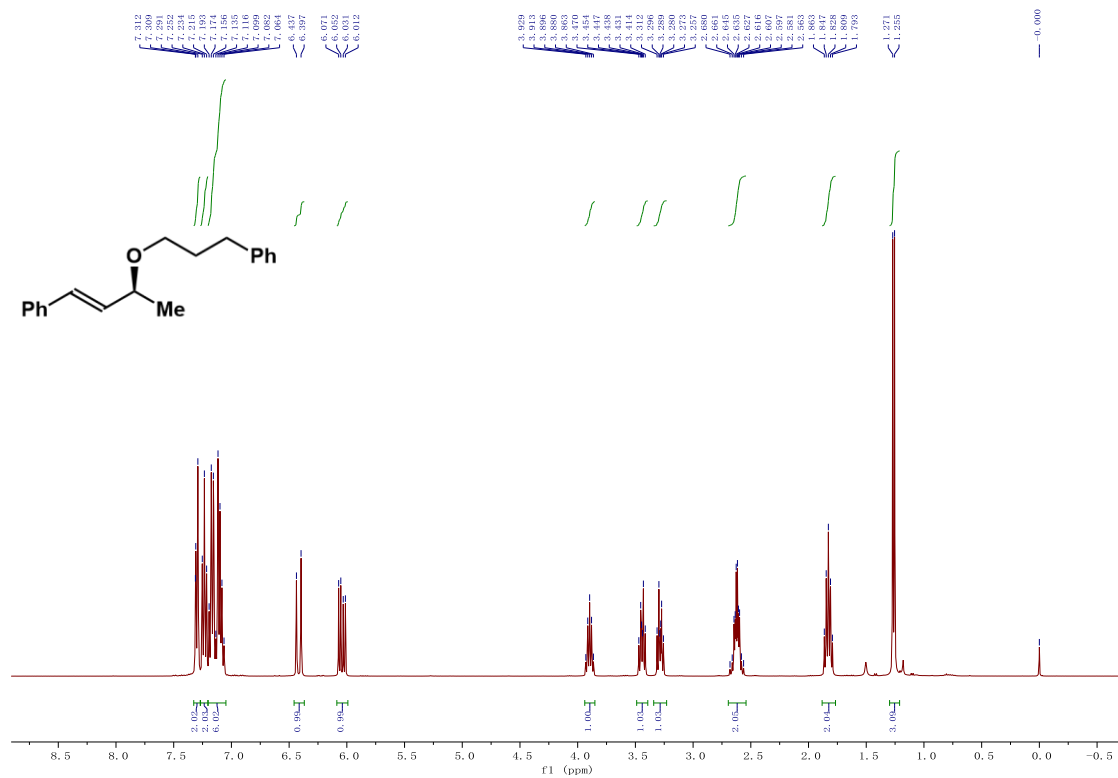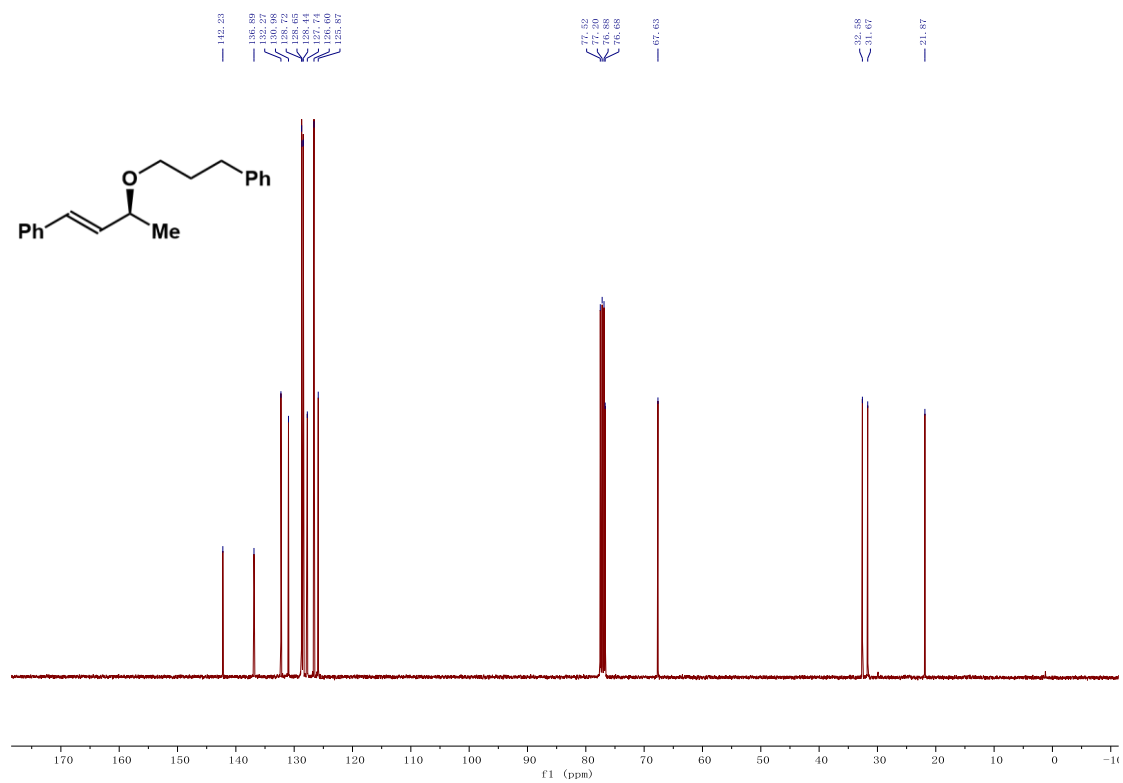

# (*S,E*)-3-(3-chloropropoxy)but-1-en-1-yl)benzene (3ae)

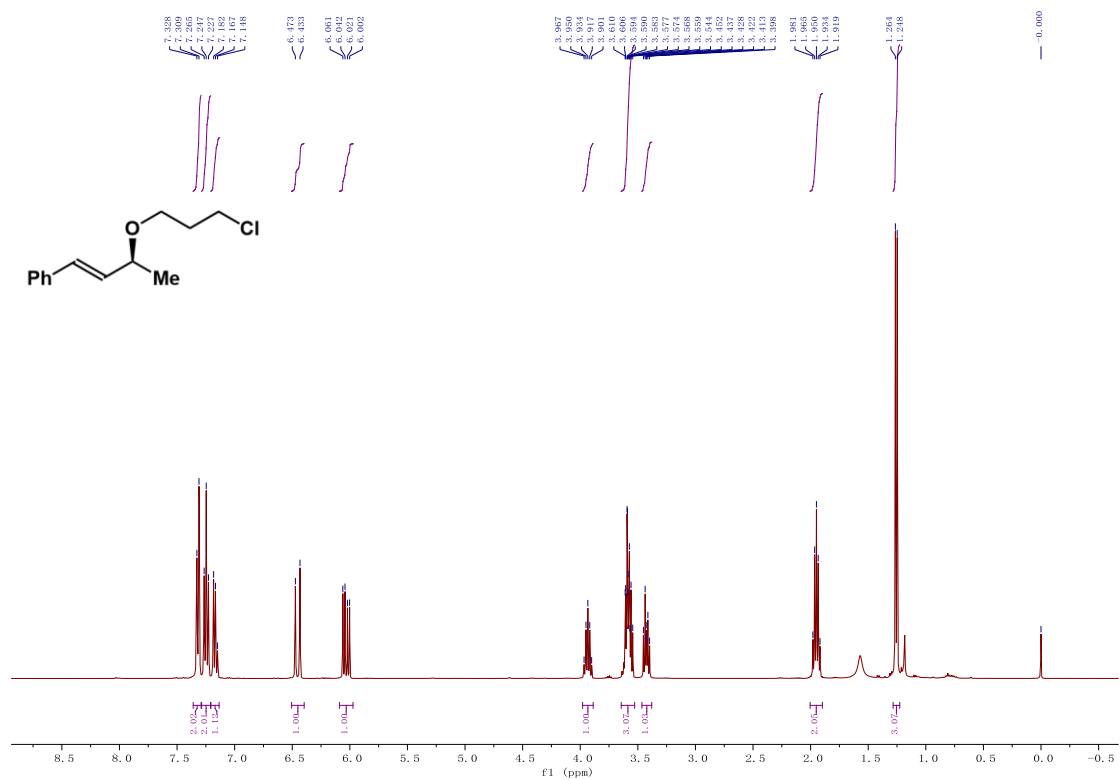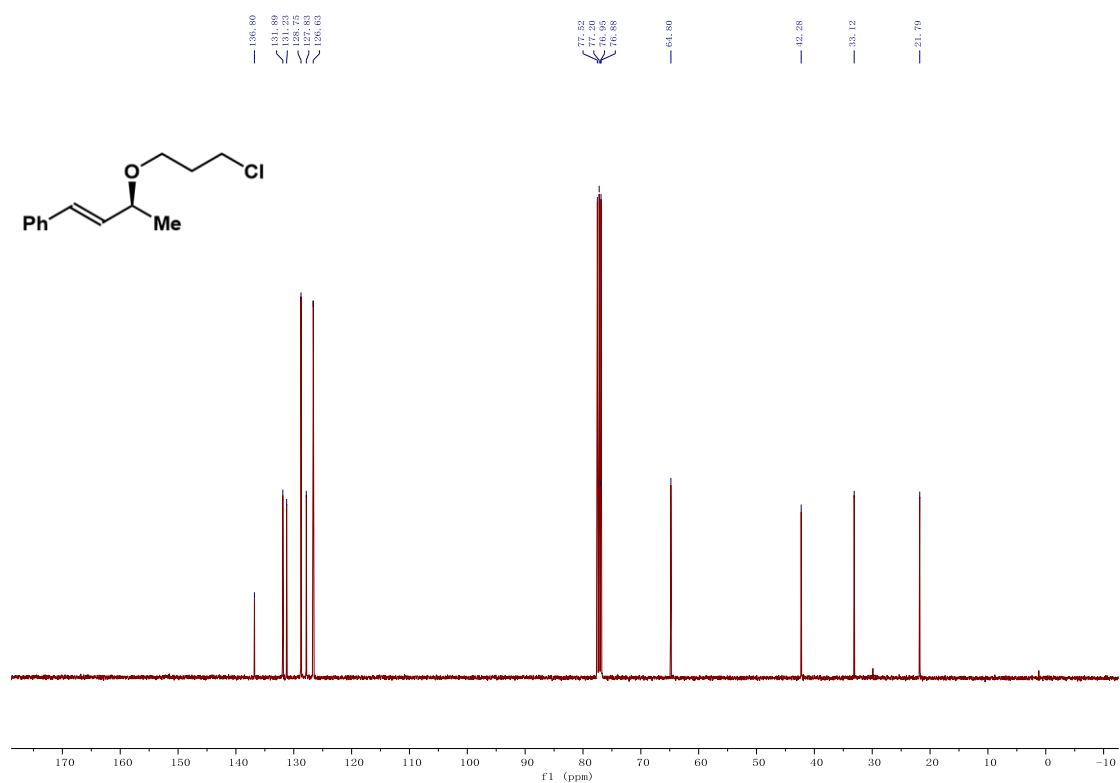

# (*S,E*)-trimethyl(3-((4-phenylbut-3-en-2-yl)oxy)propyl)silane (3af)

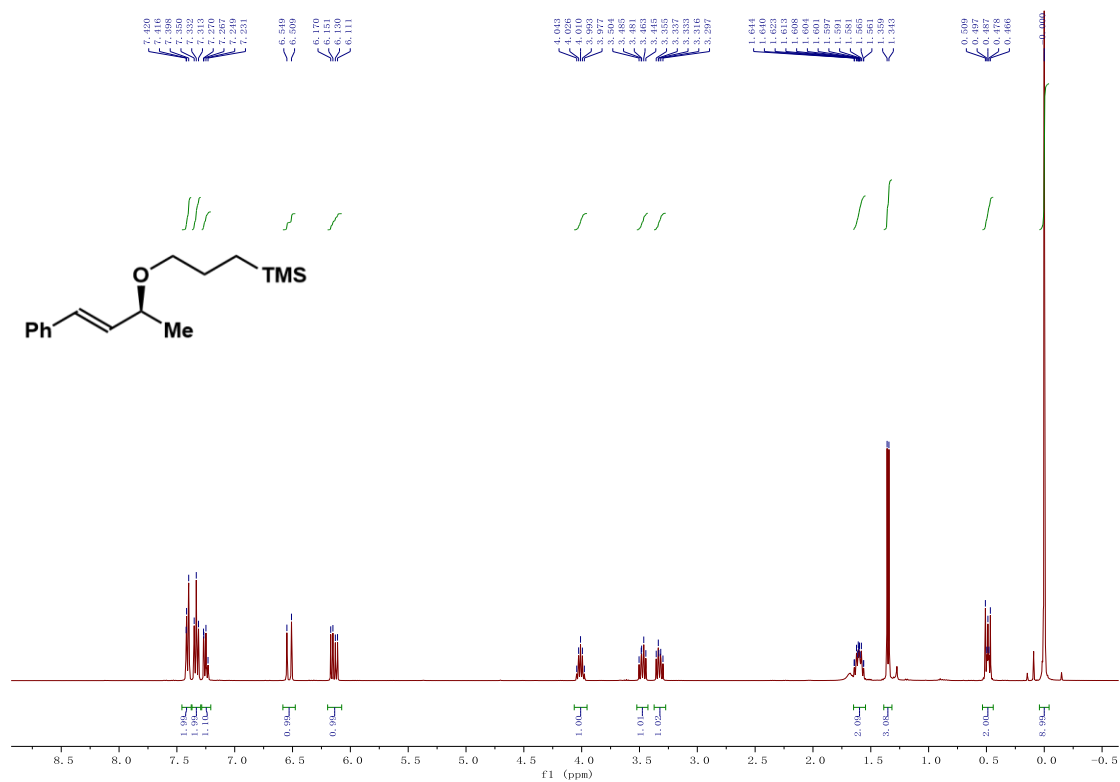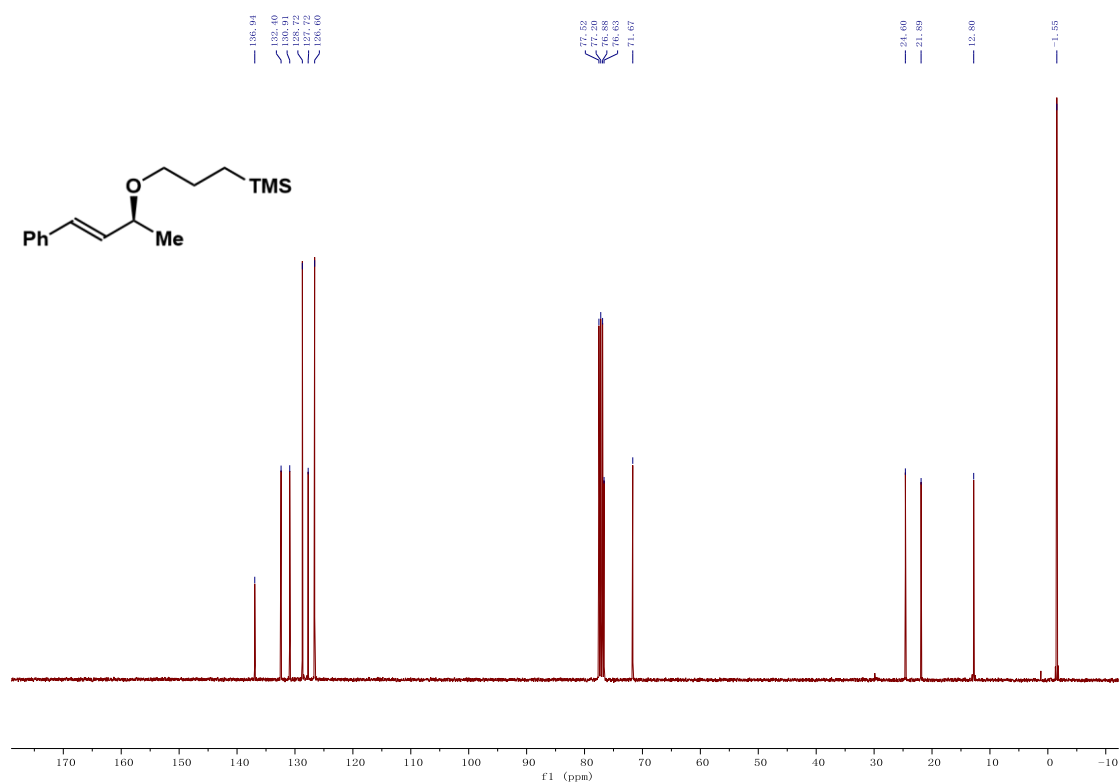

**((*S,E*)-3-(cinnamyloxy)but-1-en-1-yl)benzene (3ag)**

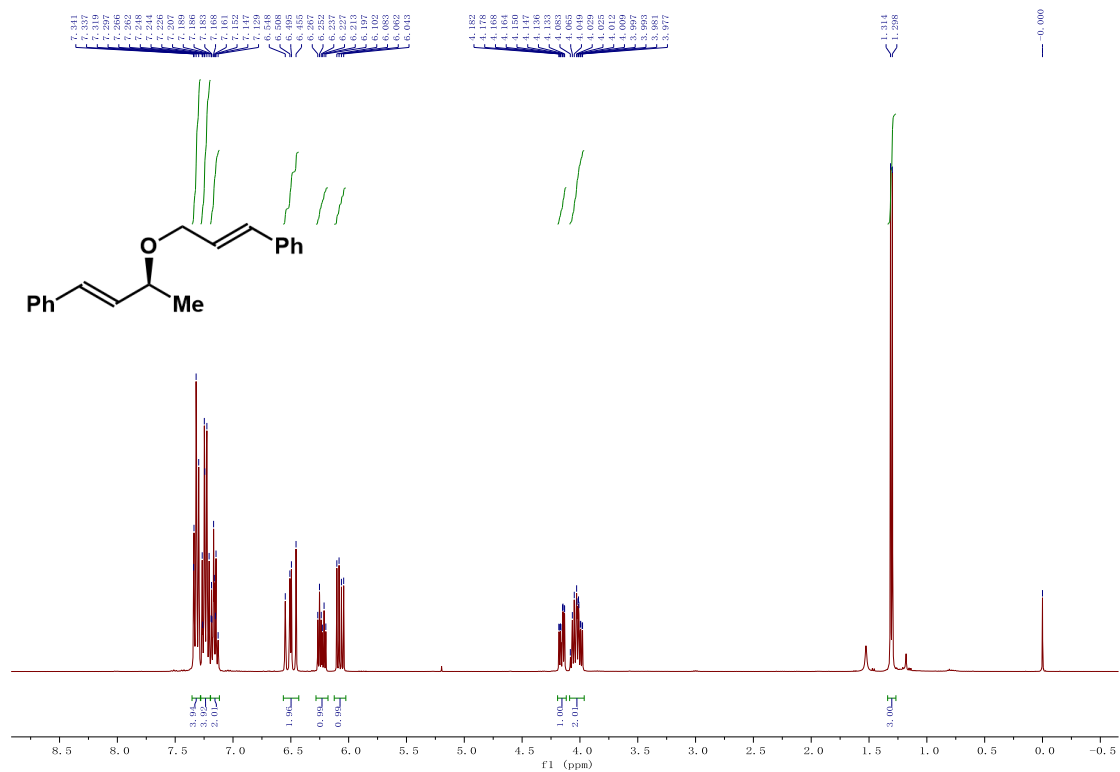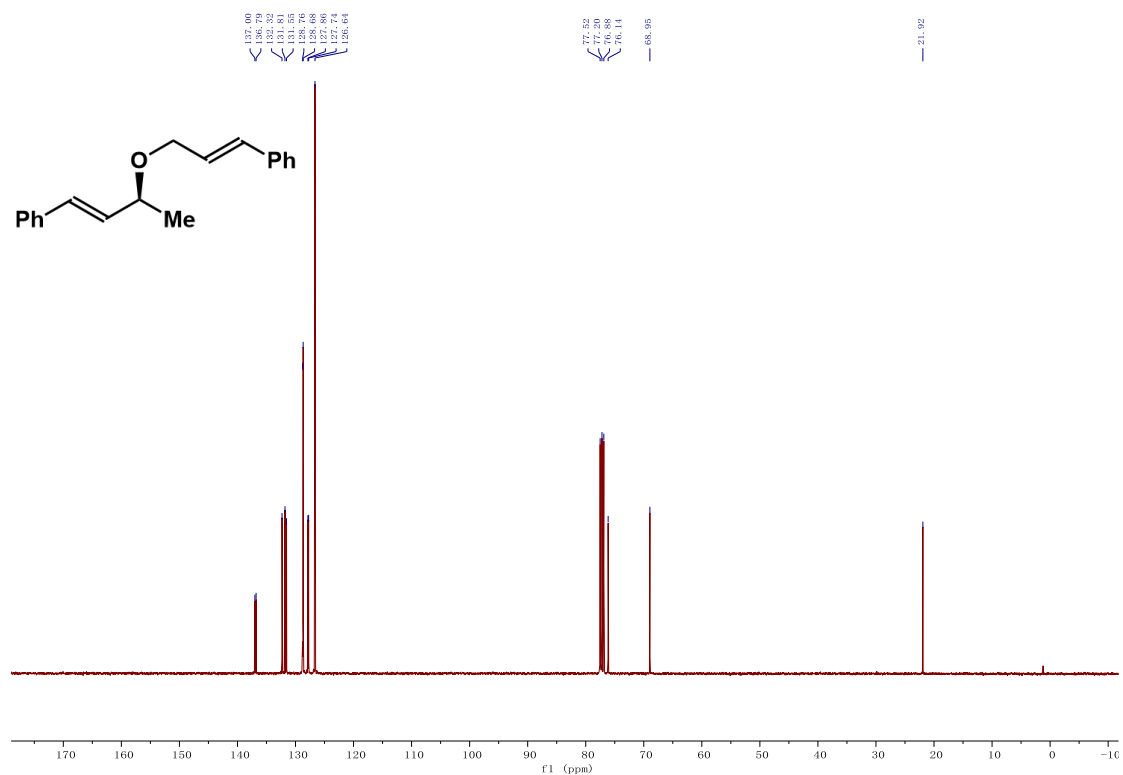

**(*S,E*)-1-fluoro-4-(((4-phenylbut-3-en-2-yl)oxy)methyl)benzene (3ah)**

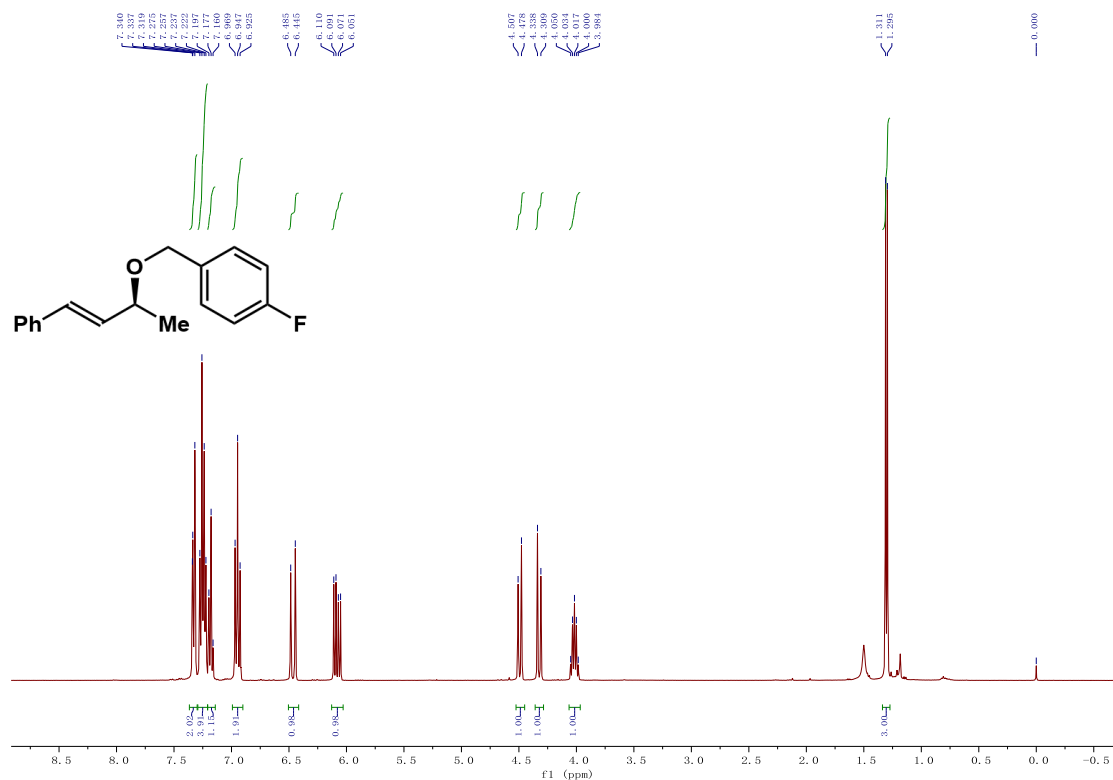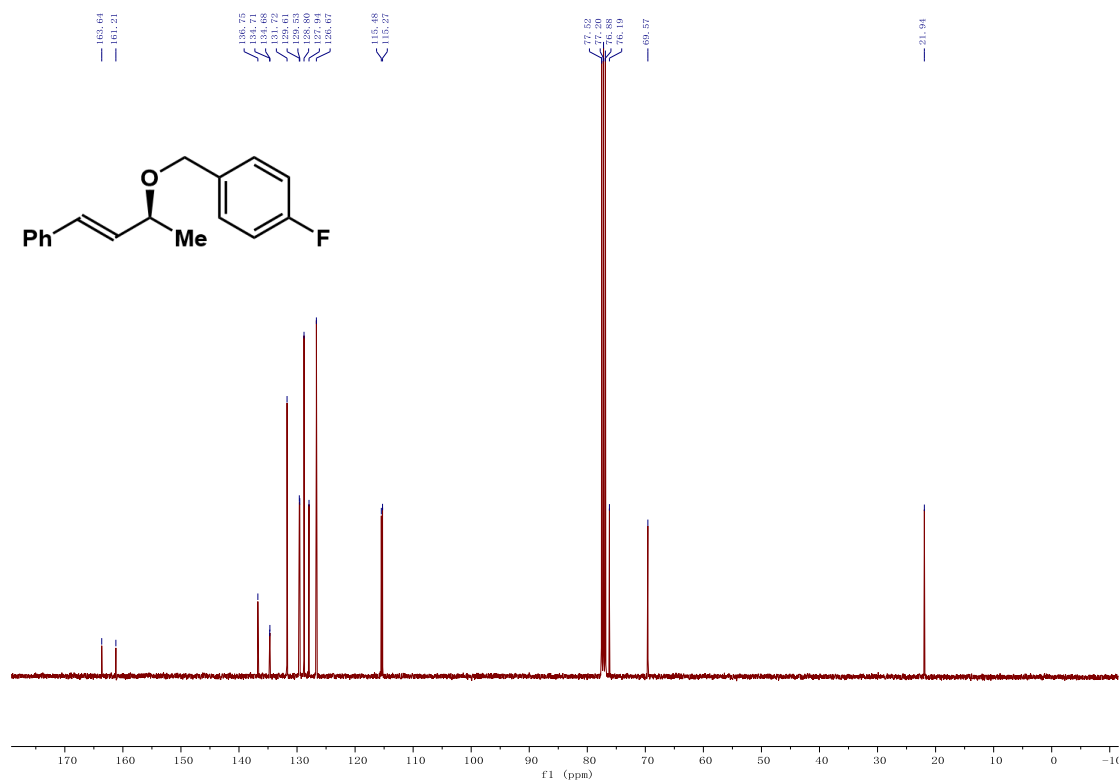



**(S,E)-1-methyl-4-(((4-phenylbut-3-en-2-yl)oxy)methyl)benzene (3ai)**

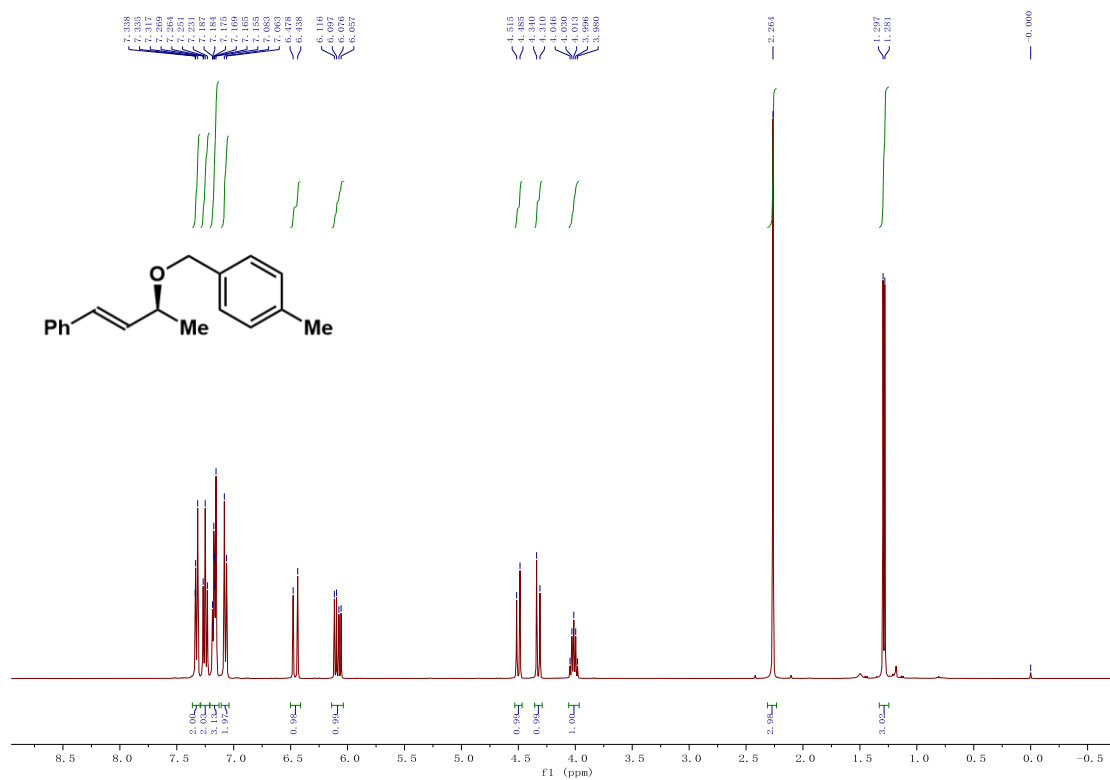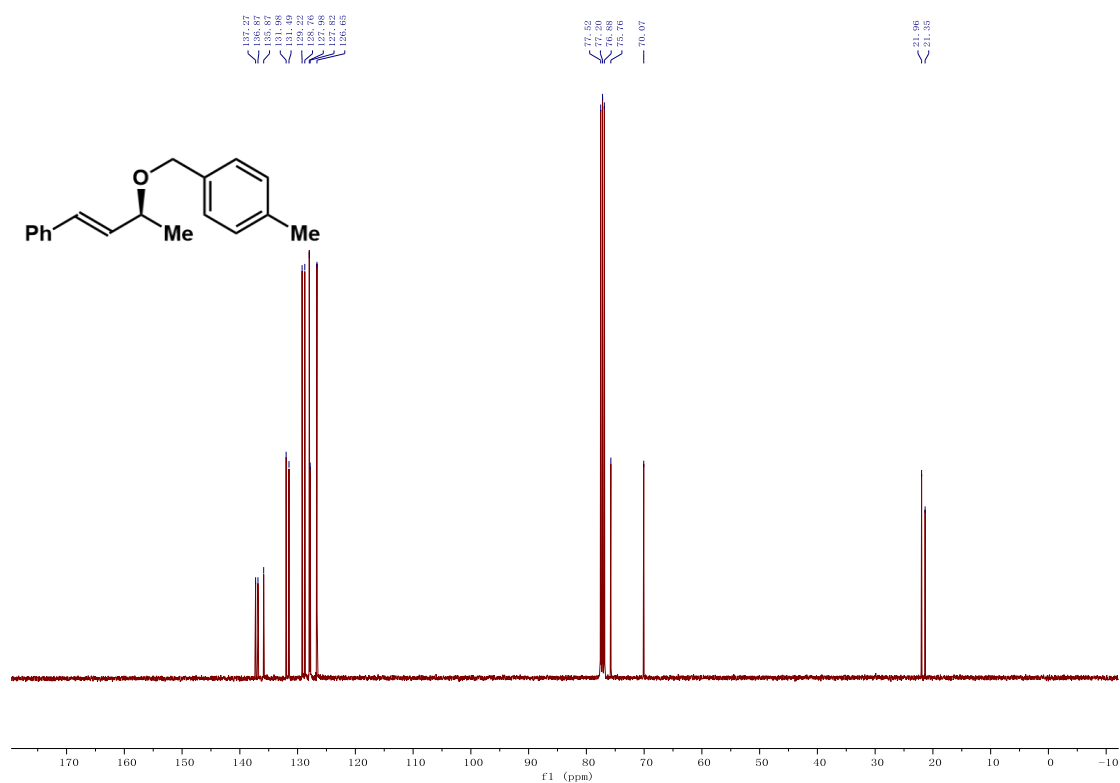

**(S,E)-1-methoxy-4-(((4-phenylbut-3-en-2-yl)oxy)methyl)benzene (3aj)**

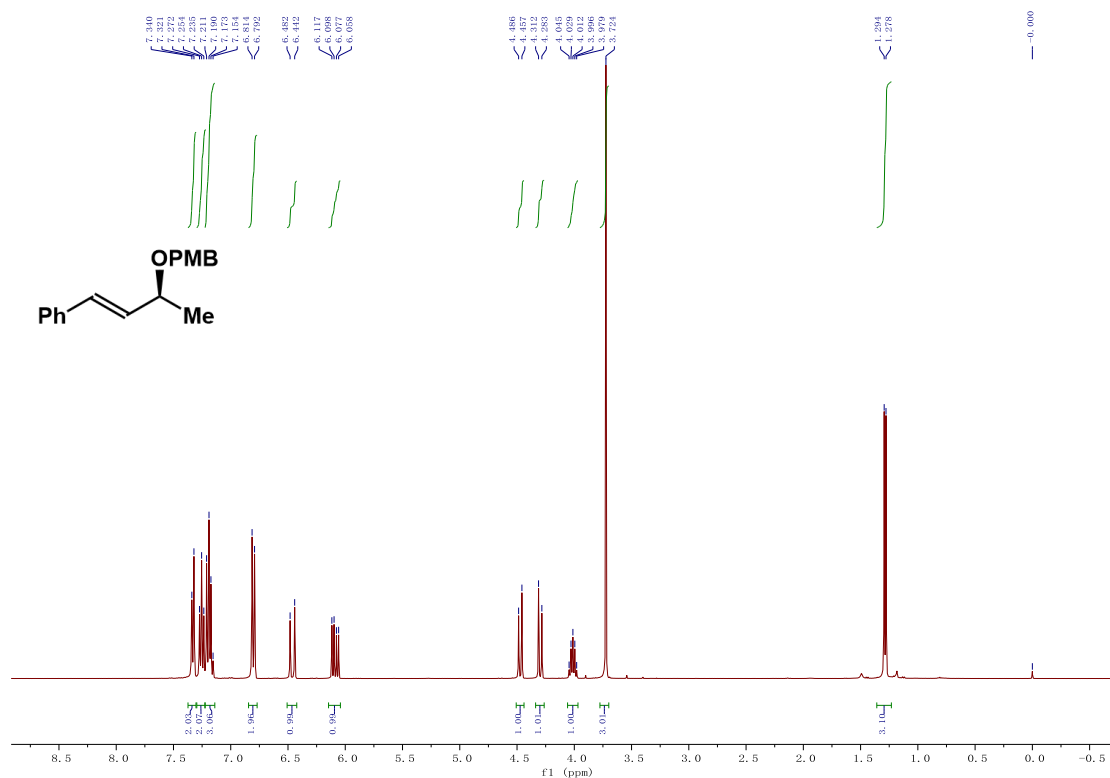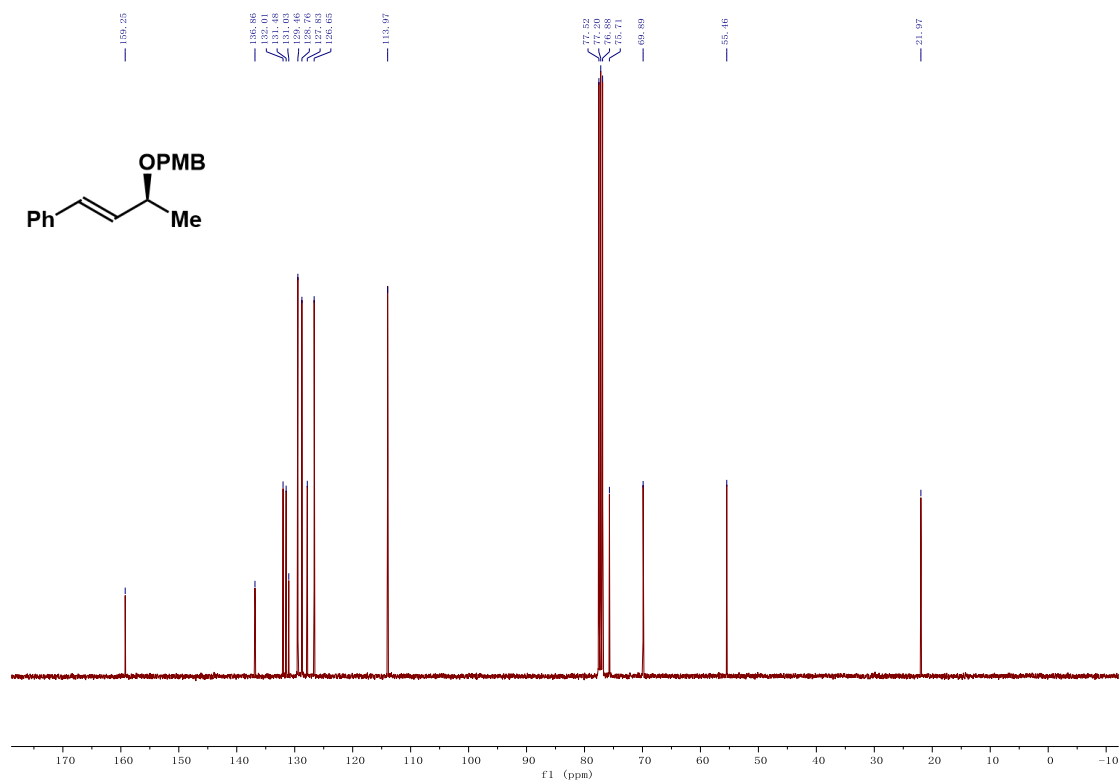

**((*S,E*)-3-(((*S*)-3,7-dimethyloct-6-en-1-yl)oxy)but-1-en-1-yl)benzene (3ak)**

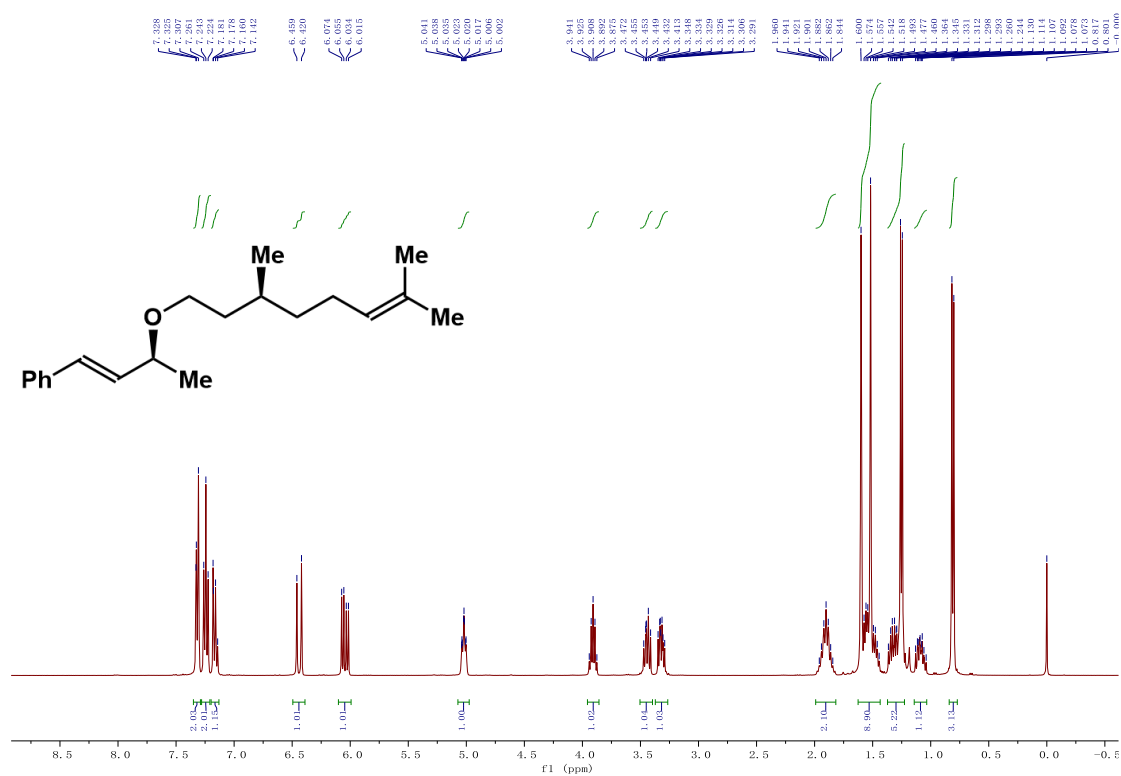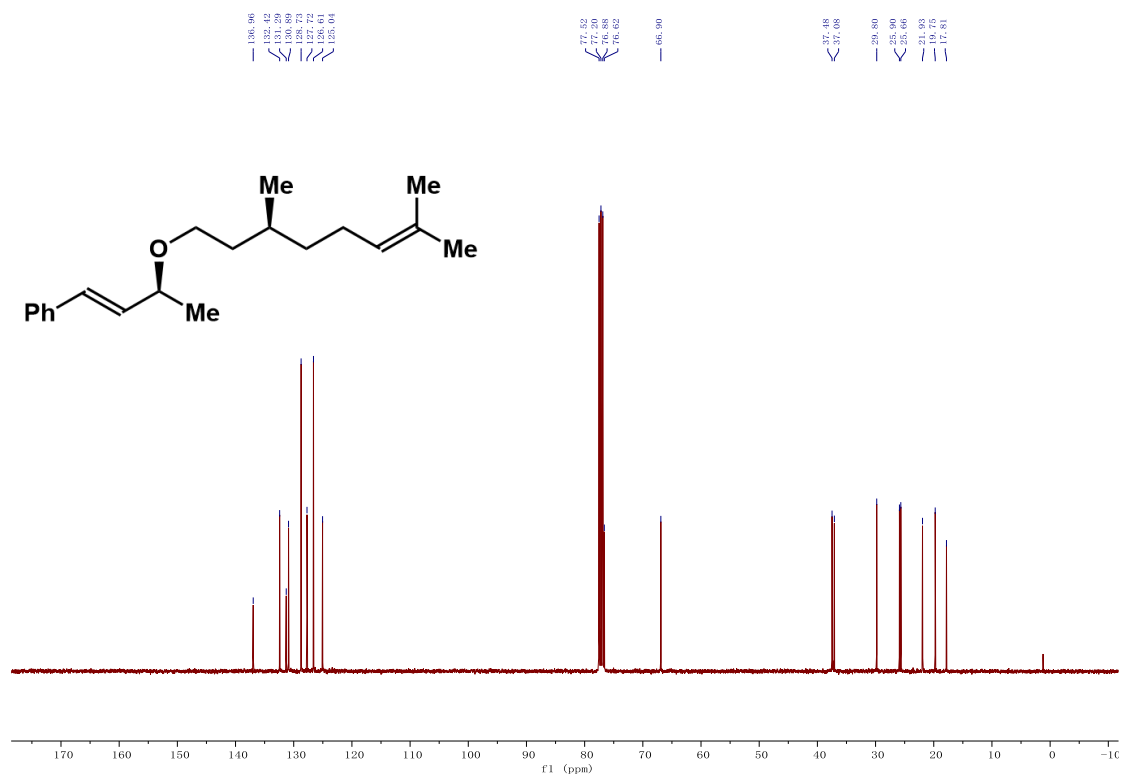

# (*S,E*)-(3-cyclopropoxybut-1-en-1-yl)benzene (3a)

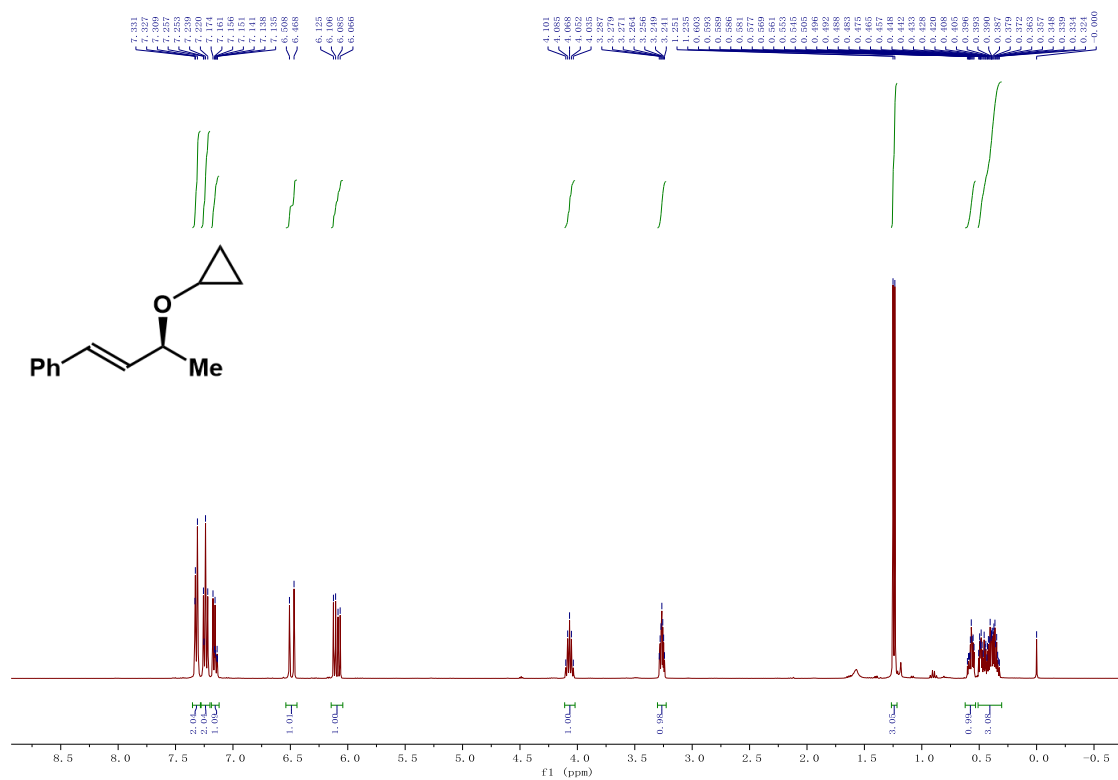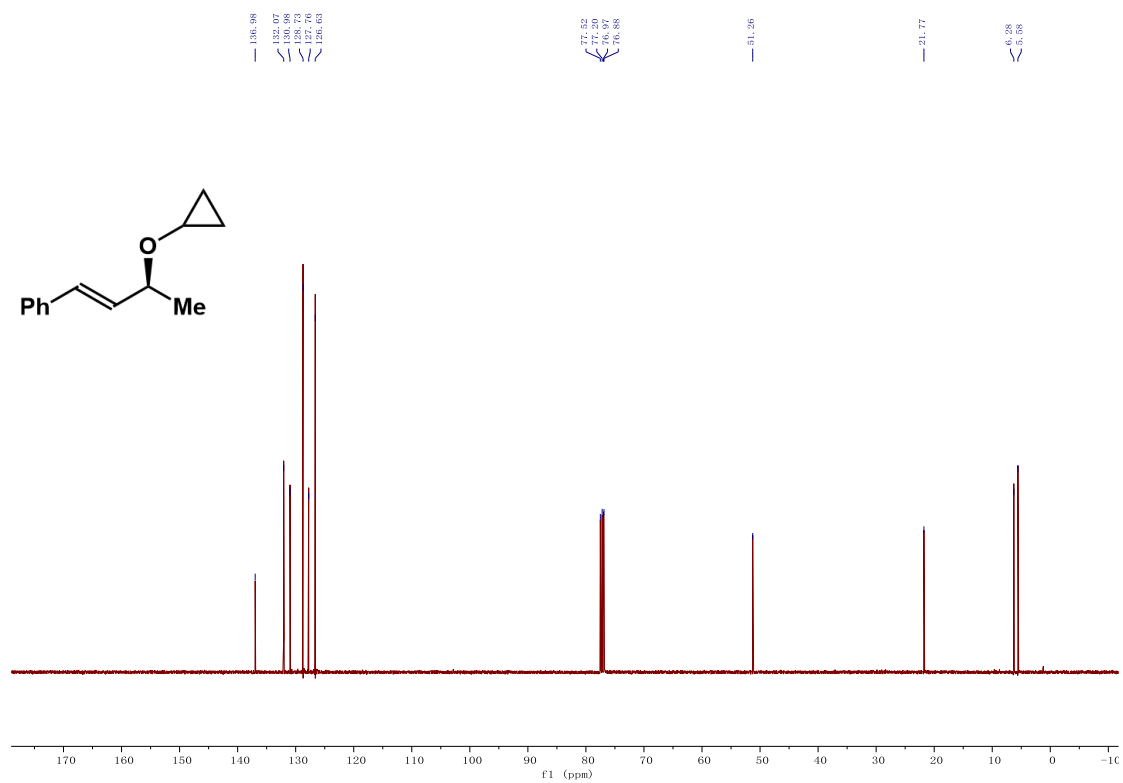

**(*S,E*)-(3-(cyclopentyloxy)but-1-en-1-yl)benzene (3am)**

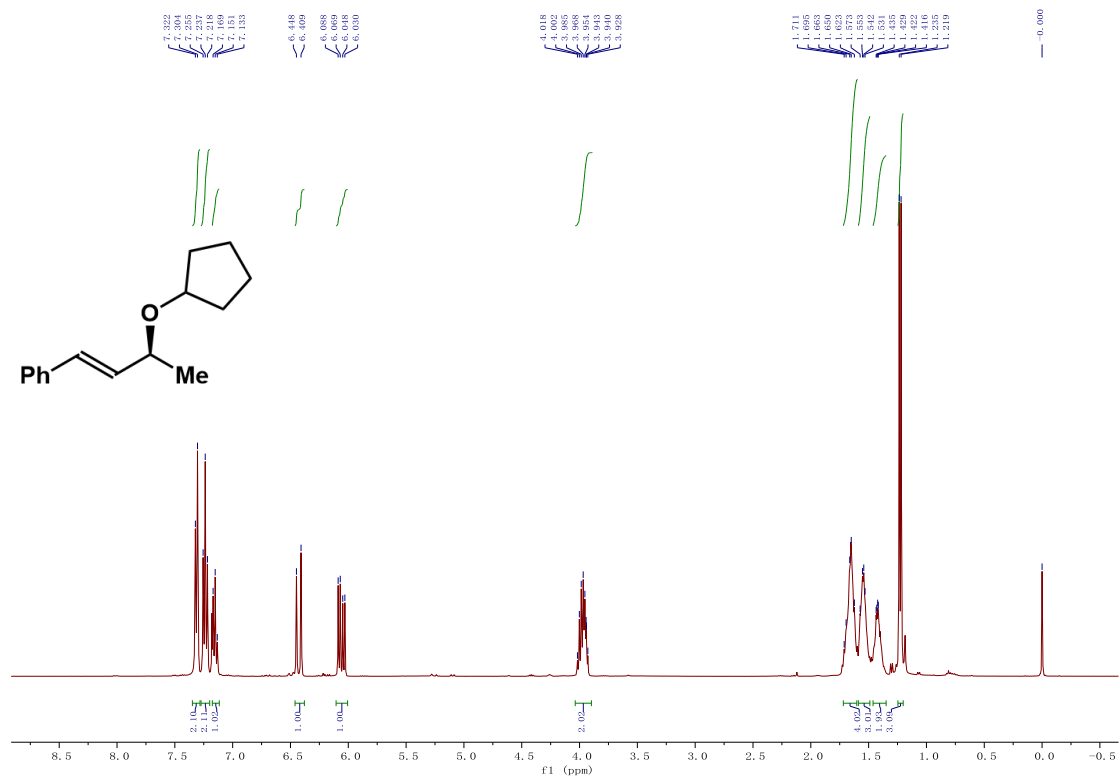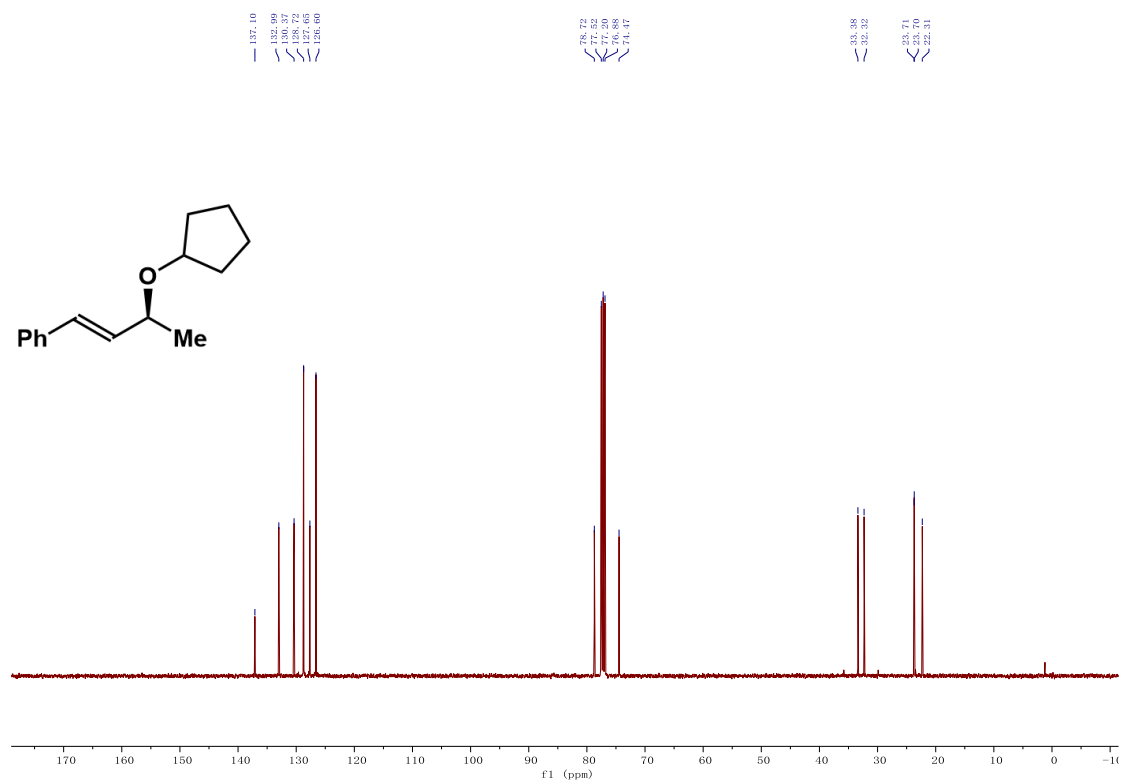

## 7. HPLC spectra

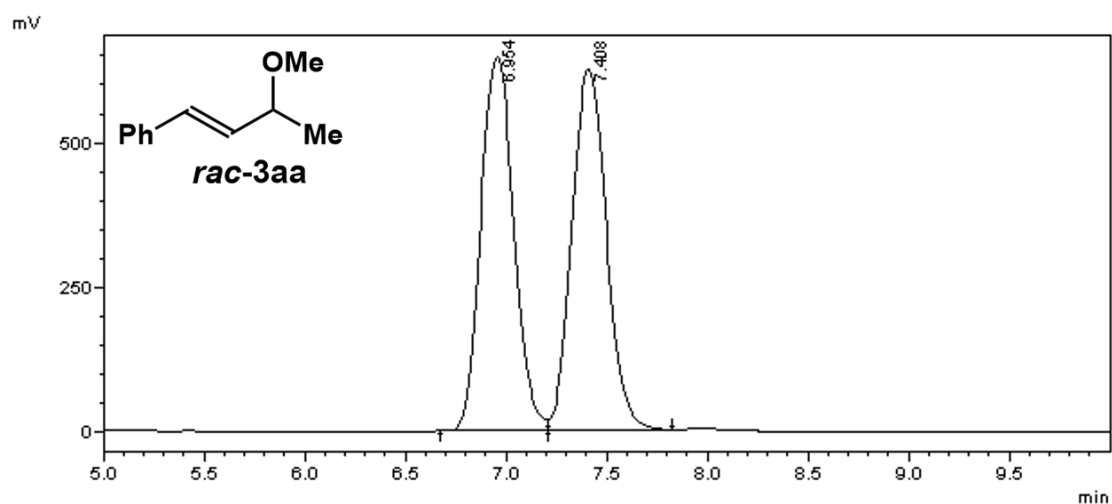

峰表

| 峰# | 保留时间  | 面积      | 高度     | 面积 %   |
|----|-------|---------|--------|--------|
| 1  | 6.954 | 7361837 | 646214 | 49.697 |
| 2  | 7.408 | 7451494 | 624049 | 50.303 |

Translation of Chinese characters to English:

| Peak | Retention time | Area    | Height | Area % |
|------|----------------|---------|--------|--------|
| 1    | 6.954          | 7361837 | 646214 | 49.697 |
| 2    | 7.408          | 7451494 | 624049 | 50.303 |

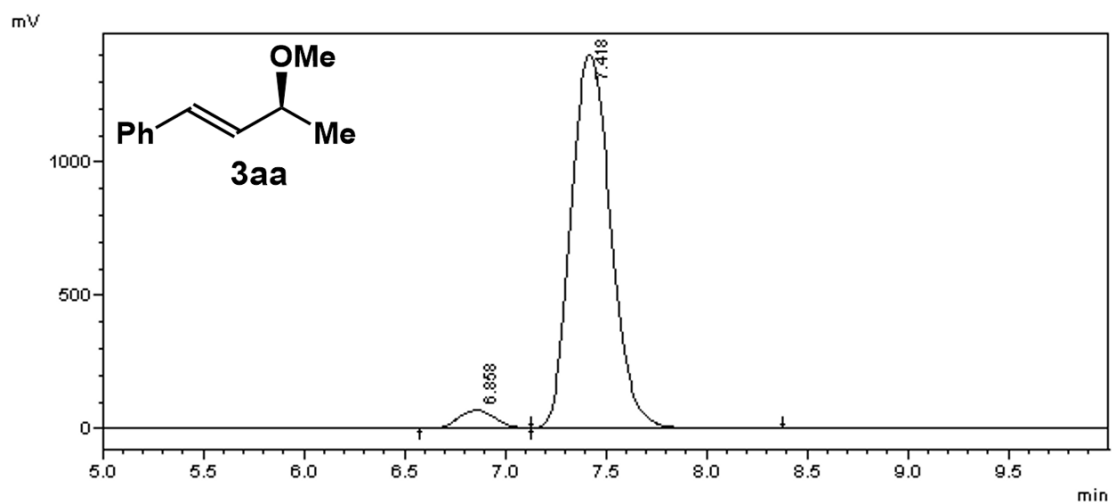

峰表

| 峰# | 保留时间  | 面积       | 高度      | 面积 %   |
|----|-------|----------|---------|--------|
| 1  | 6.858 | 864070   | 67818   | 4.265  |
| 2  | 7.418 | 19394157 | 1399002 | 95.735 |

Translation of Chinese characters to English:

| Peak | Retention time | Area     | Height  | Area % |
|------|----------------|----------|---------|--------|
| 1    | 6.858          | 864070   | 67818   | 4.265  |
| 2    | 7.418          | 19394157 | 1399002 | 95.735 |

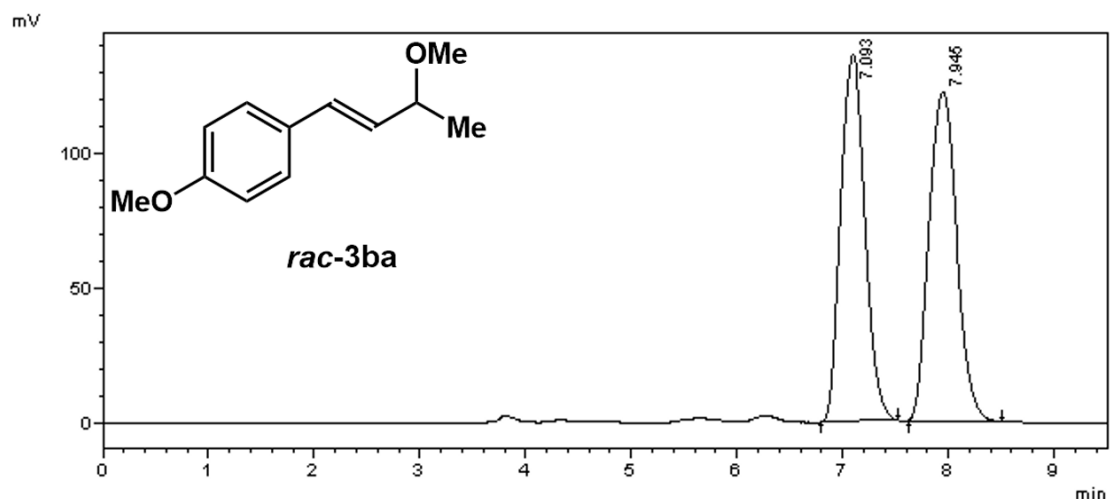

峰表

| 峰# | 保留时间  | 面积      | 高度     | 面积 %   |
|----|-------|---------|--------|--------|
| 1  | 7.093 | 2189999 | 135662 | 49.640 |
| 2  | 7.945 | 2221778 | 121882 | 50.360 |

Translation of Chinese characters to English:

| Peak | Retention time | Area    | Height | Area % |
|------|----------------|---------|--------|--------|
| 1    | 7.093          | 2189999 | 135662 | 49.640 |
| 2    | 7.945          | 2221778 | 121882 | 50.360 |

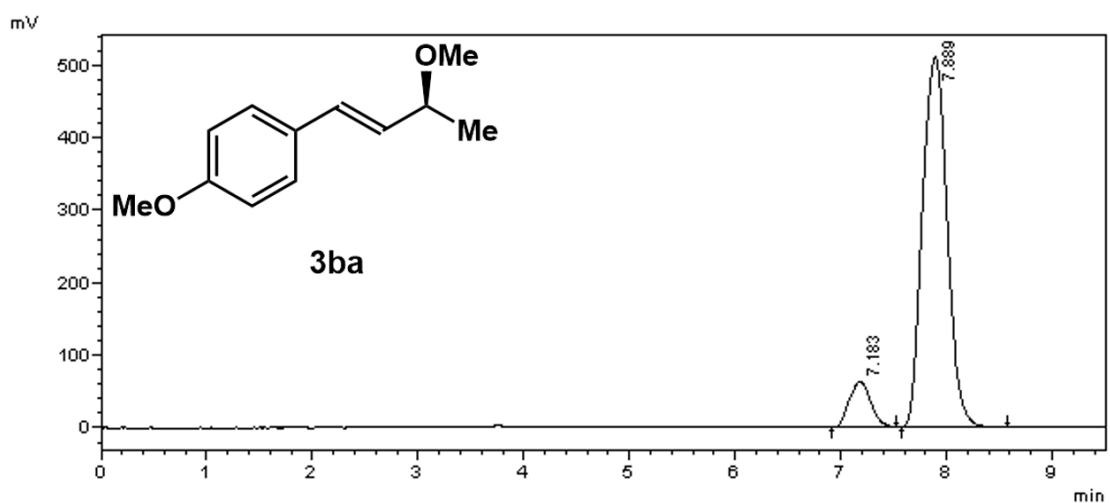

峰表

| 峰# | 保留时间  | 面积      | 高度     | 面积 %   |
|----|-------|---------|--------|--------|
| 1  | 7.183 | 903107  | 62506  | 9.882  |
| 2  | 7.889 | 8235719 | 511176 | 90.118 |

Translation of Chinese characters to English:

| Peak | Retention time | Area    | Height | Area % |
|------|----------------|---------|--------|--------|
| 1    | 7.183          | 903107  | 62506  | 9.882  |
| 2    | 7.889          | 8235719 | 511176 | 90.118 |

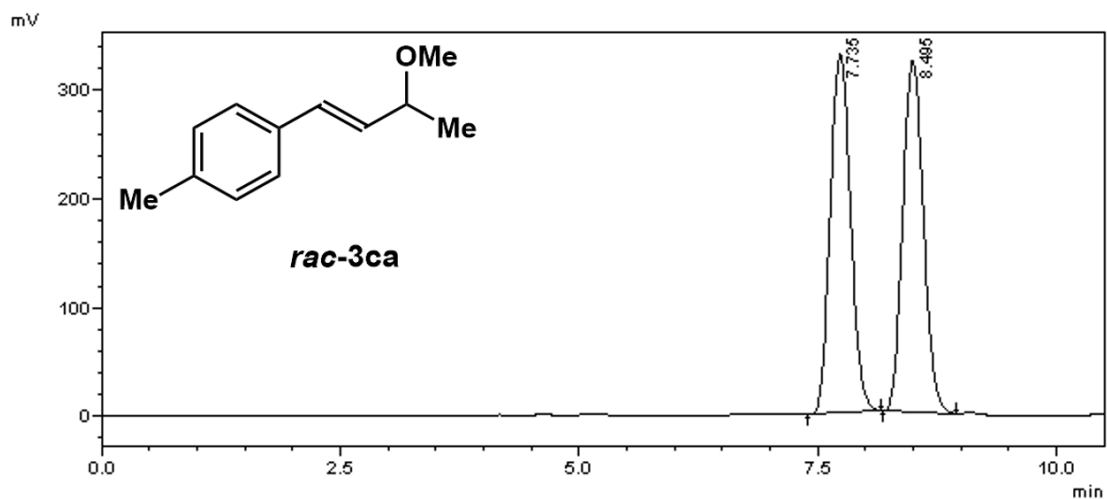

峰表

| 峰# | 保留时间  | 面积      | 高度     | 面积 %   |
|----|-------|---------|--------|--------|
| 1  | 7.735 | 4908470 | 330301 | 50.146 |
| 2  | 8.495 | 4879876 | 323212 | 49.854 |

Translation of Chinese characters to English:

| Peak | Retention time | Area    | Height | Area % |
|------|----------------|---------|--------|--------|
| 1    | 7.735          | 4908470 | 330301 | 50.146 |
| 2    | 8.495          | 4879876 | 323212 | 49.854 |

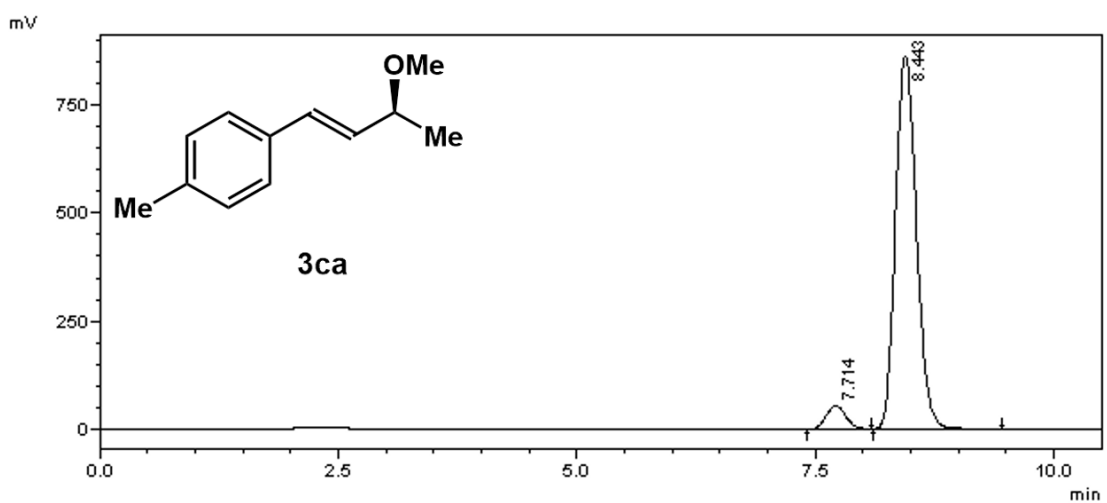

峰表

| 峰# | 保留时间  | 面积       | 高度     | 面积 %   |
|----|-------|----------|--------|--------|
| 1  | 7.714 | 765405   | 53432  | 5.495  |
| 2  | 8.443 | 13164465 | 861908 | 94.505 |

Translation of Chinese characters to English:

| Peak | Retention time | Area     | Height | Area % |
|------|----------------|----------|--------|--------|
| 1    | 7.714          | 765405   | 53432  | 5.495  |
| 2    | 8.443          | 13164465 | 861908 | 94.505 |



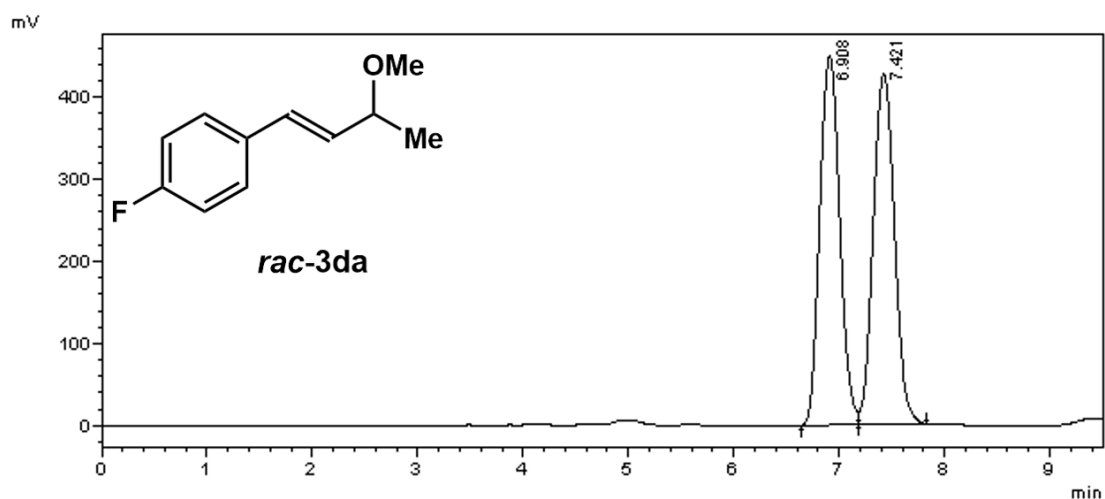

峰表

| 峰# | 保留时间  | 面积      | 高度     | 面积 %   |
|----|-------|---------|--------|--------|
| 1  | 6.908 | 5820464 | 449221 | 49.676 |
| 2  | 7.421 | 5896483 | 426253 | 50.324 |

Translation of Chinese characters to English:

| Peak | Retention time | Area    | Height | Area % |
|------|----------------|---------|--------|--------|
| 1    | 6.908          | 5820464 | 449221 | 49.676 |
| 2    | 7.421          | 5896483 | 426253 | 50.324 |

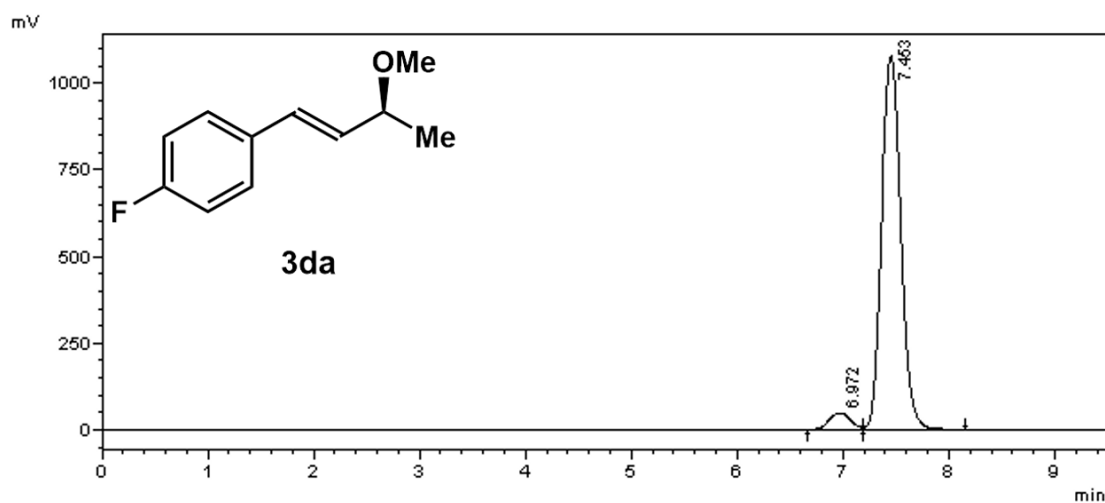

峰表

| 峰# | 保留时间  | 面积       | 高度      | 面积 %   |
|----|-------|----------|---------|--------|
| 1  | 6.972 | 670855   | 47841   | 4.663  |
| 2  | 7.453 | 13714505 | 1078721 | 95.337 |

Translation of Chinese characters to English:

| Peak | Retention time | Area     | Height  | Area % |
|------|----------------|----------|---------|--------|
| 1    | 6.972          | 670855   | 47841   | 4.663  |
| 2    | 7.453          | 13714505 | 1078721 | 95.337 |

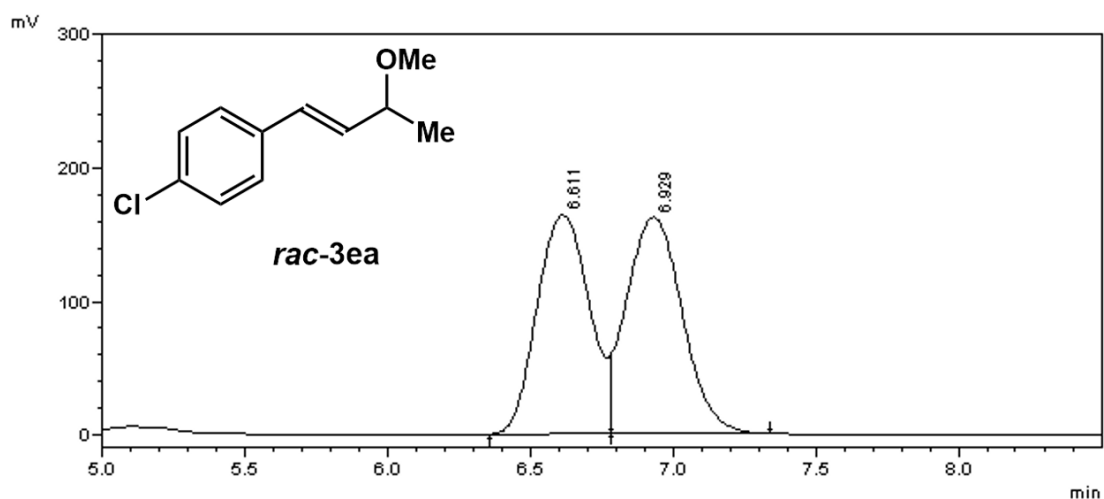

峰表

| 峰# | 保留时间  | 面积      | 高度     | 面积 %   |
|----|-------|---------|--------|--------|
| 1  | 6.611 | 2123040 | 164452 | 49.149 |
| 2  | 6.929 | 2196522 | 162631 | 50.851 |

Translation of Chinese characters to English:

| Peak | Retention time | Area    | Height | Area % |
|------|----------------|---------|--------|--------|
| 1    | 6.611          | 2123040 | 164452 | 49.149 |
| 2    | 6.929          | 2196552 | 162631 | 50.851 |

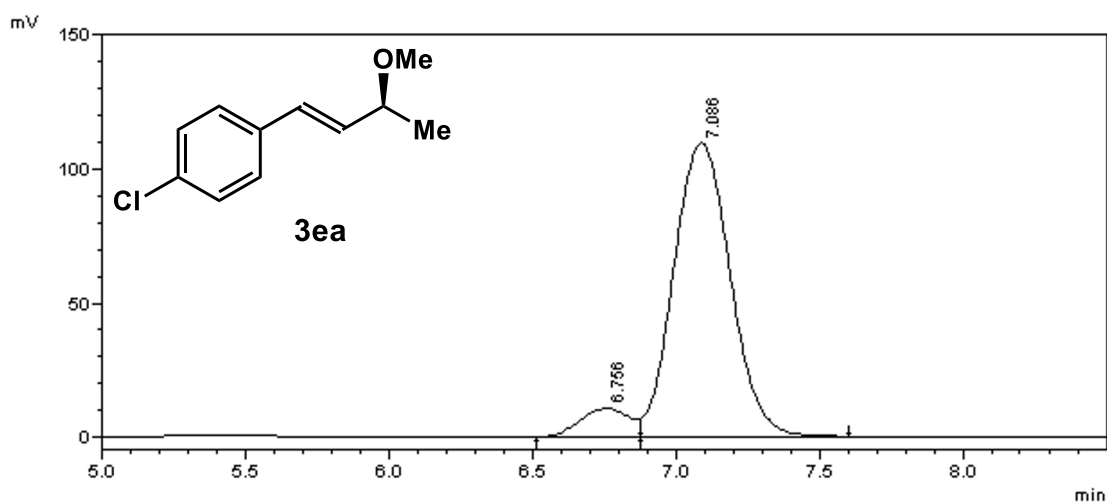

峰表

| 峰# | 保留时间  | 面积      | 高度     | 面积 %   |
|----|-------|---------|--------|--------|
| 1  | 6.756 | 126281  | 10394  | 7.788  |
| 2  | 7.086 | 1495234 | 109577 | 92.212 |

Translation of Chinese characters to English:

| Peak | Retention time | Area    | Height | Area % |
|------|----------------|---------|--------|--------|
| 1    | 6.756          | 126281  | 10394  | 7.788  |
| 2    | 7.086          | 1495234 | 109577 | 92.212 |

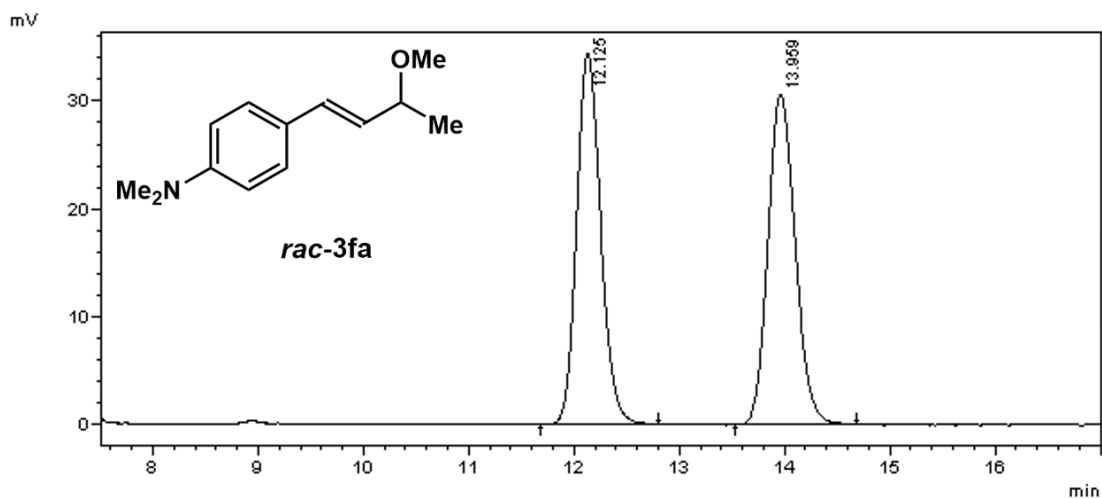

峰表

| 峰# | 保留时间   | 面积     | 高度    | 面积 %   |
|----|--------|--------|-------|--------|
| 1  | 12.125 | 542871 | 34333 | 49.794 |
| 2  | 13.959 | 547357 | 30616 | 50.206 |

Translation of Chinese characters to English:

| Peak | Retention time | Area   | Height | Area % |
|------|----------------|--------|--------|--------|
| 1    | 12.125         | 542871 | 34333  | 49.794 |
| 2    | 13.959         | 547357 | 30616  | 50.206 |

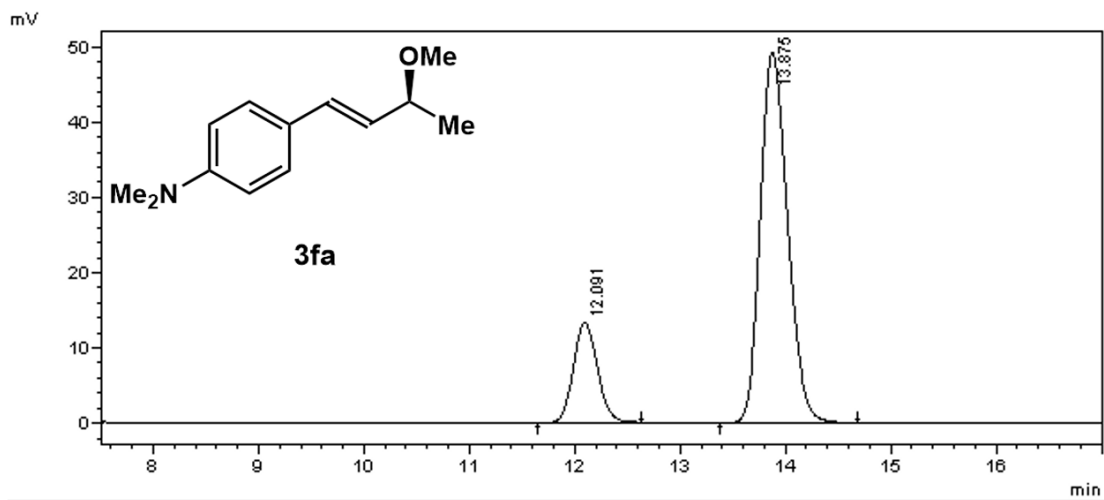

峰表

| 峰# | 保留时间   | 面积     | 高度    | 面积 %   |
|----|--------|--------|-------|--------|
| 1  | 12.091 | 210754 | 13304 | 19.341 |
| 2  | 13.875 | 878904 | 49172 | 80.659 |

Translation of Chinese characters to English:

| Peak | Retention time | Area   | Height | Area % |
|------|----------------|--------|--------|--------|
| 1    | 12.091         | 210754 | 13304  | 19.341 |
| 2    | 13.875         | 878904 | 49172  | 80.659 |

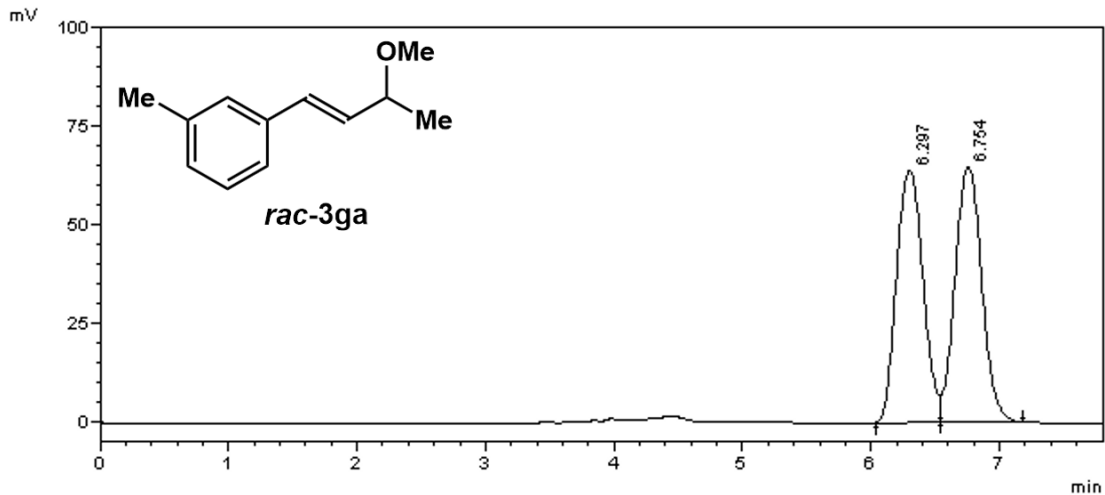

峰表

| 峰# | 保留时间  | 面积     | 高度    | 面积 %   |
|----|-------|--------|-------|--------|
| 1  | 6.297 | 917149 | 64056 | 49.337 |
| 2  | 6.754 | 941812 | 64908 | 50.663 |

Translation of Chinese characters to English:

| Peak | Retention time | Area   | Height | Area % |
|------|----------------|--------|--------|--------|
| 1    | 6.297          | 917149 | 64056  | 49.337 |
| 2    | 6.754          | 941812 | 64908  | 50.663 |

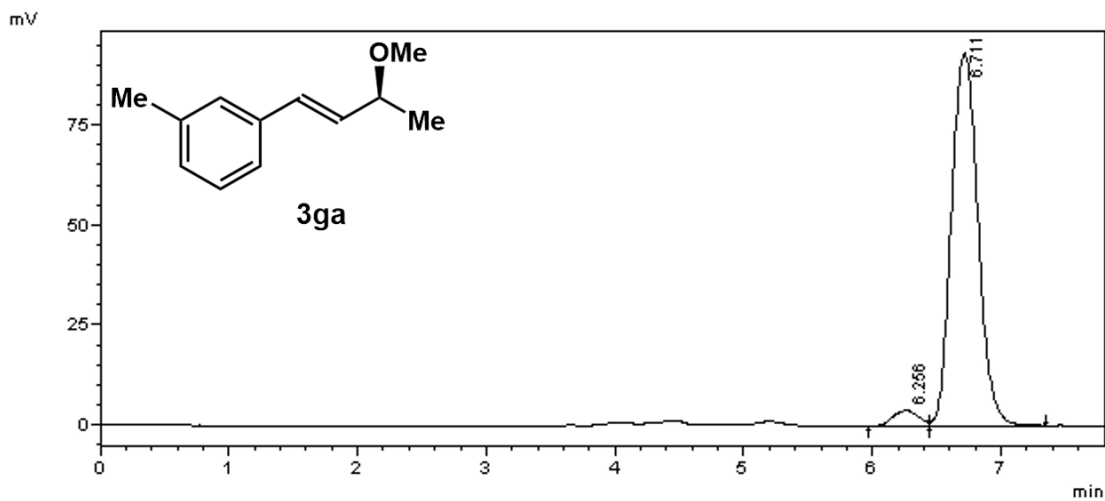

峰表

| 峰# | 保留时间  | 面积      | 高度    | 面积 %   |
|----|-------|---------|-------|--------|
| 1  | 6.256 | 52956   | 3817  | 3.807  |
| 2  | 6.711 | 1338129 | 93240 | 96.193 |

Translation of Chinese characters to English:

| Peak | Retention time | Area    | Height | Area % |
|------|----------------|---------|--------|--------|
| 1    | 6.256          | 52956   | 3817   | 3.807  |
| 2    | 6.711          | 1338129 | 93240  | 96.193 |

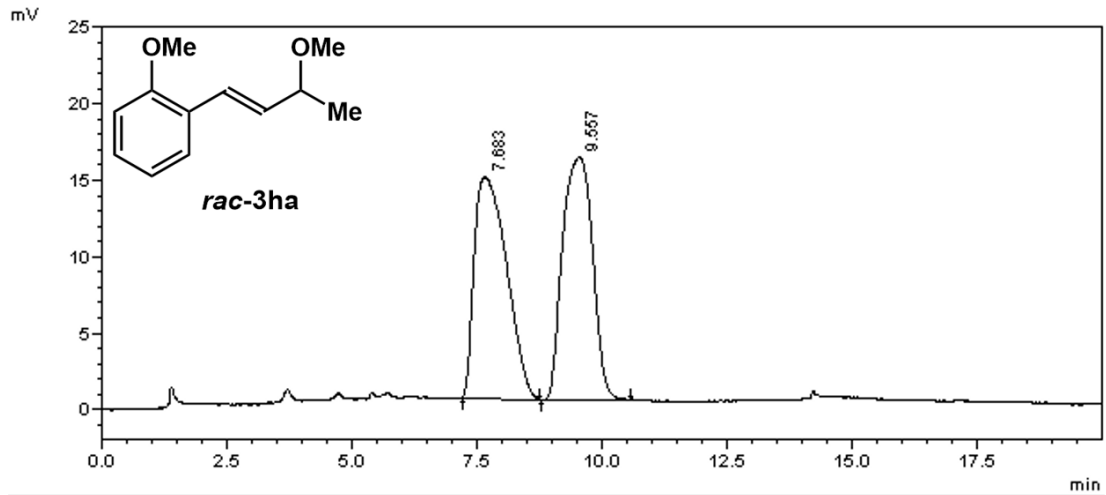

峰表

| 峰# | 保留时间  | 面积     | 高度    | 面积 %   |
|----|-------|--------|-------|--------|
| 1  | 7.683 | 652837 | 14434 | 49.591 |
| 2  | 9.557 | 663614 | 15858 | 50.409 |

Translation of Chinese characters to English:

| Peak | Retention time | Area   | Height | Area % |
|------|----------------|--------|--------|--------|
| 1    | 7.683          | 652837 | 14434  | 49.591 |
| 2    | 9.557          | 663614 | 15858  | 50.409 |

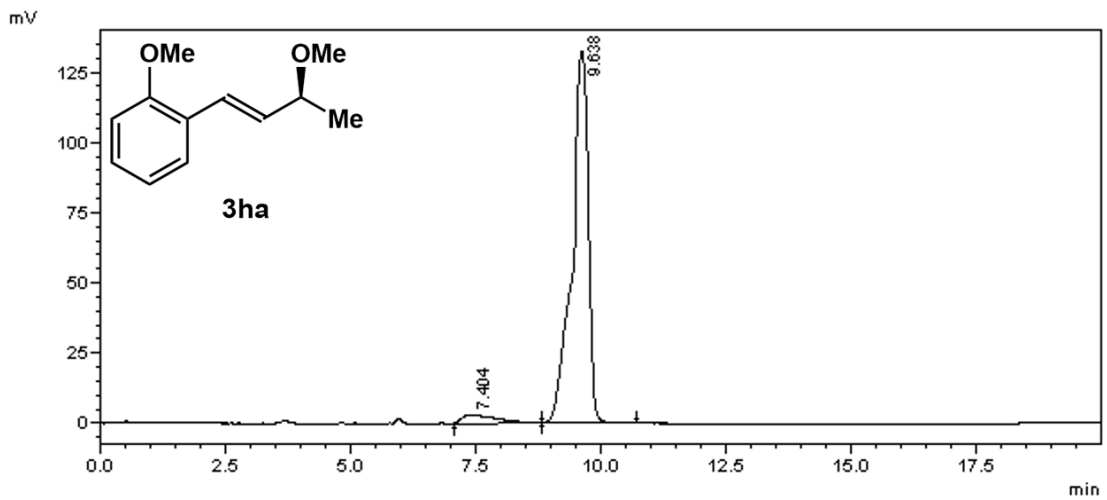

峰表

| 峰# | 保留时间  | 面积      | 高度     | 面积 %   |
|----|-------|---------|--------|--------|
| 1  | 7.404 | 143603  | 2915   | 4.603  |
| 2  | 9.638 | 2976499 | 132271 | 95.397 |

Translation of Chinese characters to English:

| Peak | Retention time | Area    | Height | Area % |
|------|----------------|---------|--------|--------|
| 1    | 7.404          | 143603  | 2915   | 4.603  |
| 2    | 9.638          | 2976499 | 132271 | 95.397 |

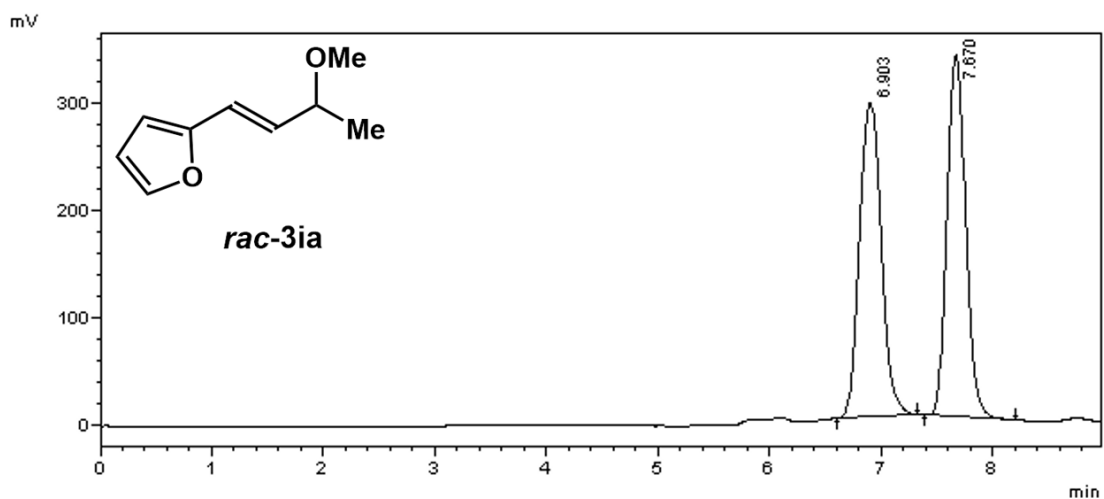

峰表

| 峰# | 保留时间  | 面积      | 高度     | 面积 %   |
|----|-------|---------|--------|--------|
| 1  | 6.903 | 3985067 | 292219 | 50.299 |
| 2  | 7.670 | 3937662 | 336405 | 49.701 |

Translation of Chinese characters to English:

| Peak | Retention time | Area    | Height | Area % |
|------|----------------|---------|--------|--------|
| 1    | 6.903          | 3985067 | 292219 | 50.299 |
| 2    | 7.670          | 3937662 | 336405 | 49.701 |

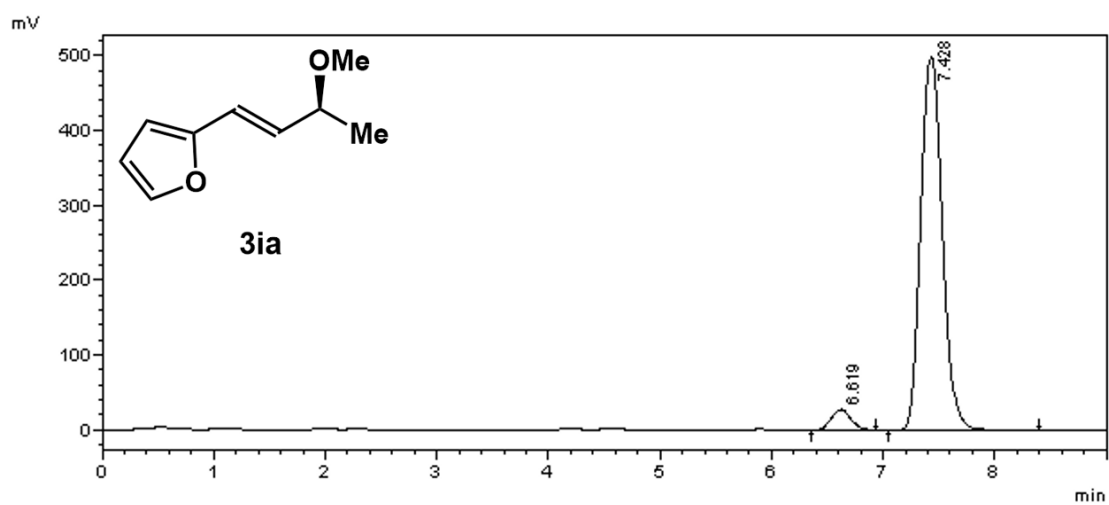

峰表

| 峰# | 保留时间  | 面积      | 高度     | 面积 %   |
|----|-------|---------|--------|--------|
| 1  | 6.619 | 333662  | 27319  | 4.740  |
| 2  | 7.428 | 6705253 | 498772 | 95.260 |

Translation of Chinese characters to English:

| Peak | Retention time | Area    | Height | Area % |
|------|----------------|---------|--------|--------|
| 1    | 6.619          | 333662  | 27319  | 4.740  |
| 2    | 7.428          | 6705253 | 498772 | 95.260 |

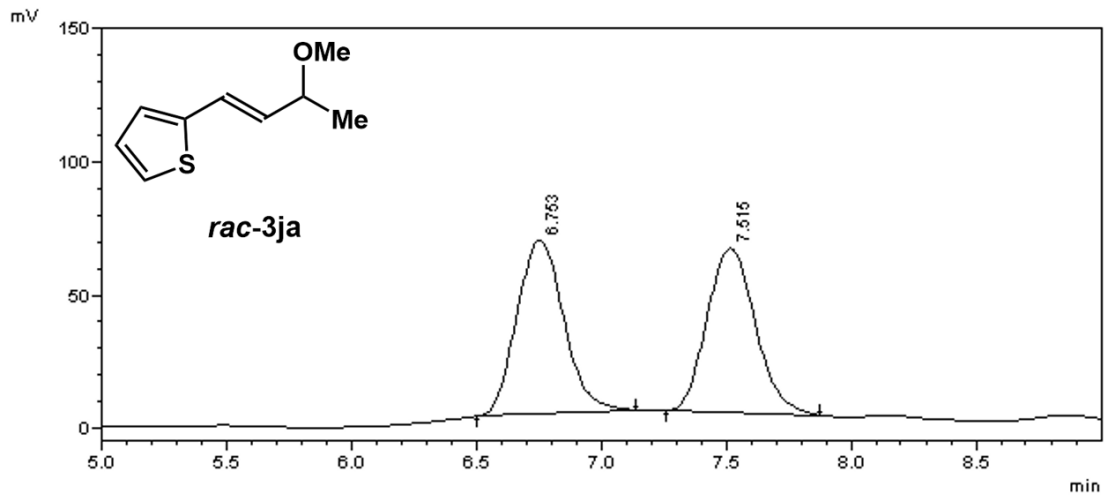

峰表

| 峰# | 保留时间  | 面积     | 高度    | 面积 %   |
|----|-------|--------|-------|--------|
| 1  | 6.753 | 854765 | 65122 | 50.694 |
| 2  | 7.515 | 831370 | 61704 | 49.306 |

Translation of Chinese characters to English:

| Peak | Retention time | Area   | Height | Area % |
|------|----------------|--------|--------|--------|
| 1    | 6.753          | 854765 | 65122  | 50.694 |
| 2    | 7.515          | 831370 | 61704  | 49.306 |

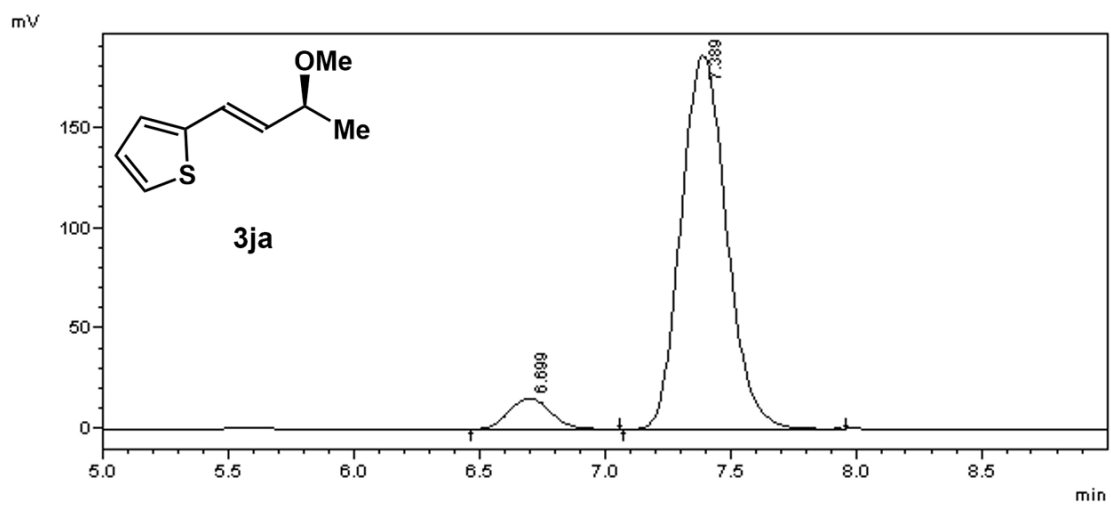

峰表

| 峰# | 保留时间  | 面积      | 高度     | 面积 %   |
|----|-------|---------|--------|--------|
| 1  | 6.699 | 177380  | 15400  | 7.062  |
| 2  | 7.389 | 2334469 | 185746 | 92.938 |

Translation of Chinese characters to English:

| Peak | Retention time | Area    | Height | Area % |
|------|----------------|---------|--------|--------|
| 1    | 6.699          | 177380  | 15400  | 7.062  |
| 2    | 7.389          | 2334469 | 185746 | 92.938 |

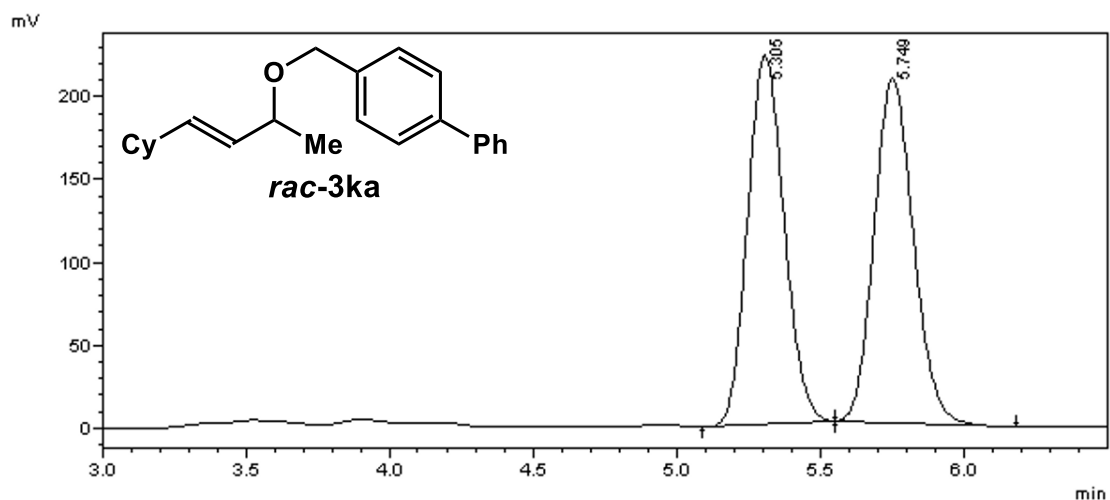

| 峰表 |       |         |        |        |
|----|-------|---------|--------|--------|
| 峰# | 保留时间  | 面积      | 高度     | 面积 %   |
| 1  | 5.305 | 1974656 | 222984 | 49.876 |
| 2  | 5.749 | 1984489 | 207748 | 50.124 |

Translation of Chinese characters to English:

| Peak | Retention time | Area    | Height | Area % |
|------|----------------|---------|--------|--------|
| 1    | 5.305          | 1974656 | 222984 | 49.876 |
| 2    | 5.749          | 1984489 | 207748 | 50.124 |

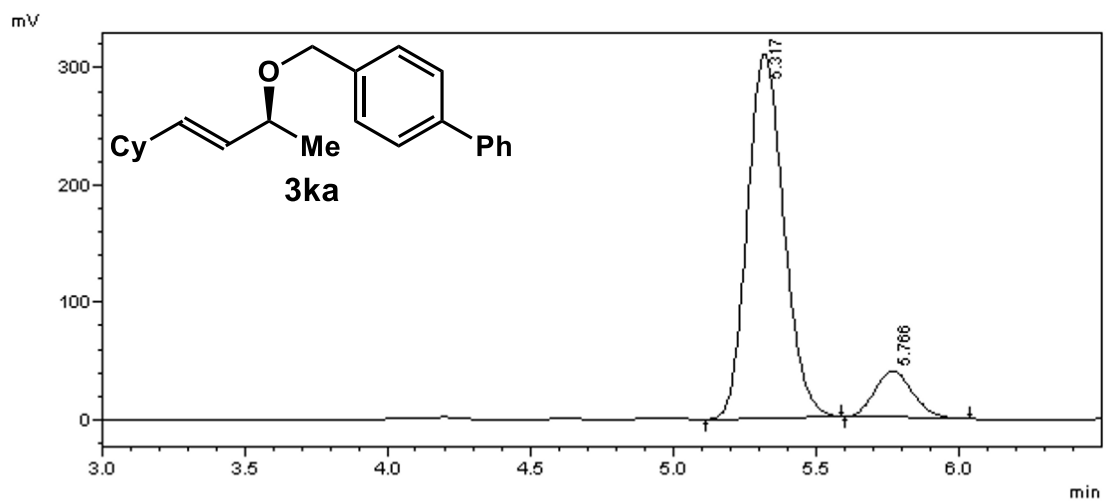

| 峰表 |       |         |        |        |
|----|-------|---------|--------|--------|
| 峰# | 保留时间  | 面积      | 高度     | 面积 %   |
| 1  | 5.317 | 2757799 | 310101 | 88.284 |
| 2  | 5.766 | 365968  | 39404  | 11.716 |

Translation of Chinese characters to English:

| Peak | Retention time | Area    | Height | Area % |
|------|----------------|---------|--------|--------|
| 1    | 5.317          | 2757799 | 310101 | 88.284 |
| 2    | 5.766          | 365968  | 39404  | 11.716 |



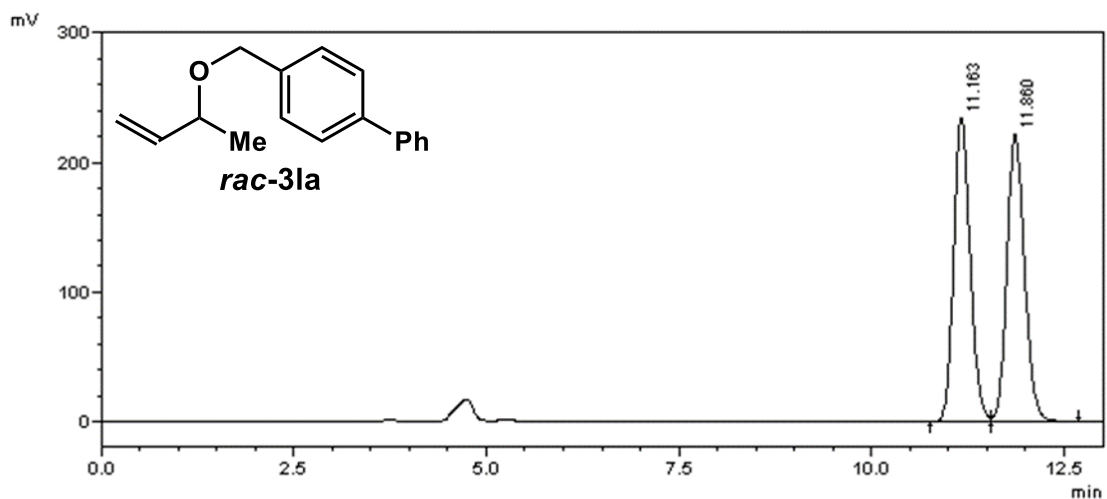

峰表

| 峰# | 保留时间   | 面积      | 高度     | 面积 %   |
|----|--------|---------|--------|--------|
| 1  | 11.163 | 3500676 | 234352 | 49.858 |
| 2  | 11.860 | 3520673 | 221613 | 50.142 |

Translation of Chinese characters to English:

| Peak | Retention time | Area    | Height | Area % |
|------|----------------|---------|--------|--------|
| 1    | 11.163         | 3500676 | 234352 | 49.858 |
| 2    | 11.860         | 3520673 | 221613 | 50.142 |

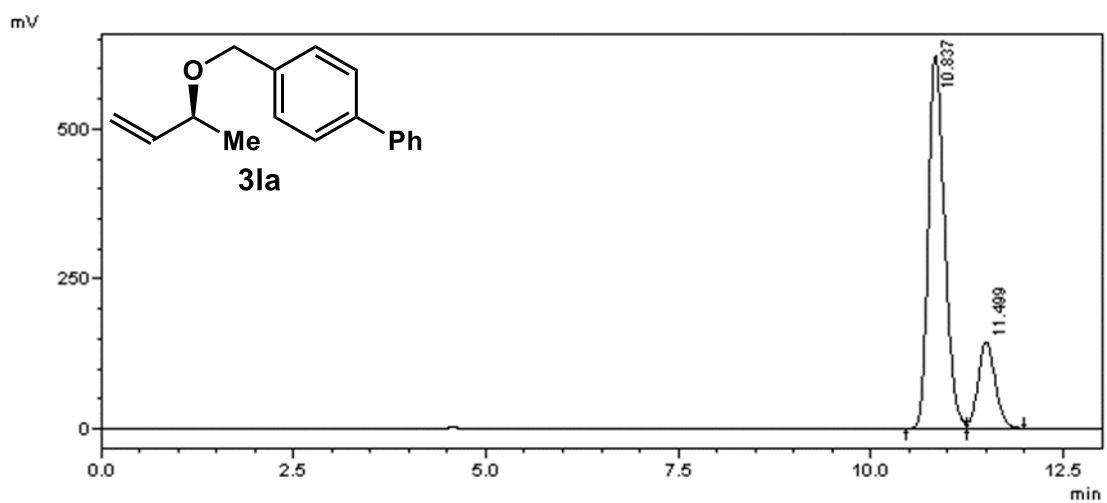

峰表

| 峰# | 保留时间   | 面积      | 高度     | 面积 %   |
|----|--------|---------|--------|--------|
| 1  | 10.837 | 9167220 | 622015 | 80.363 |
| 2  | 11.499 | 2239977 | 144200 | 19.637 |

Translation of Chinese characters to English:

| Peak | Retention time | Area    | Height | Area % |
|------|----------------|---------|--------|--------|
| 1    | 10.837         | 9167220 | 622015 | 80.363 |
| 2    | 11.499         | 2239977 | 144200 | 19.637 |

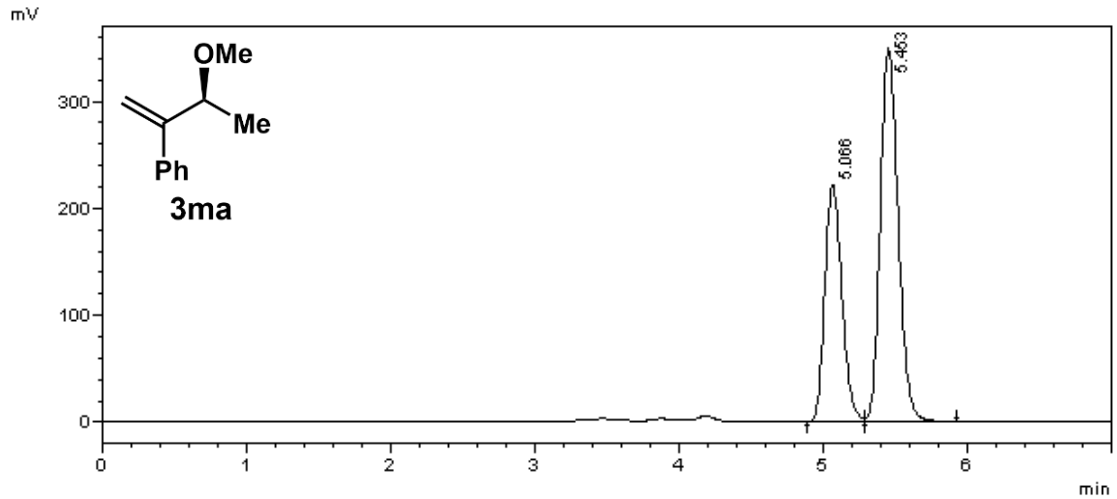

峰表

| 峰# | 保留时间  | 面积      | 高度     | 面积 %   |
|----|-------|---------|--------|--------|
| 1  | 5.066 | 1833508 | 221477 | 37.687 |
| 2  | 5.453 | 3031566 | 349684 | 62.313 |

Translation of Chinese characters to English:

| Peak | Retention time | Area    | Height | Area % |
|------|----------------|---------|--------|--------|
| 1    | 5.066          | 1833508 | 221477 | 37.687 |
| 2    | 5.453          | 3031566 | 349684 | 62.313 |

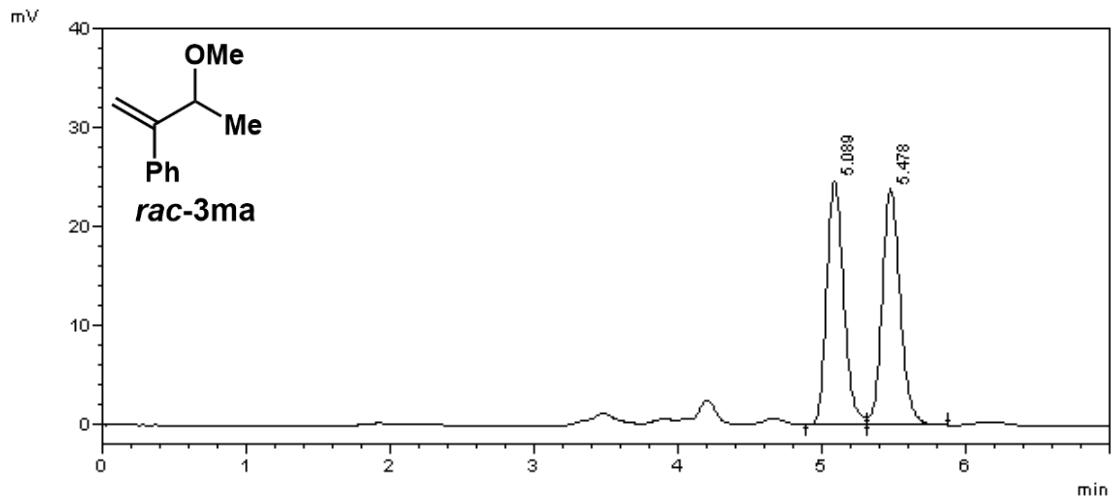

峰表

| 峰# | 保留时间  | 面积     | 高度    | 面积 %   |
|----|-------|--------|-------|--------|
| 1  | 5.089 | 203900 | 24668 | 49.562 |
| 2  | 5.478 | 207502 | 23914 | 50.438 |

Translation of Chinese characters to English:

| Peak | Retention time | Area   | Height | Area % |
|------|----------------|--------|--------|--------|
| 1    | 5.089          | 203900 | 24668  | 49.562 |
| 2    | 5.478          | 207502 | 23914  | 50.438 |

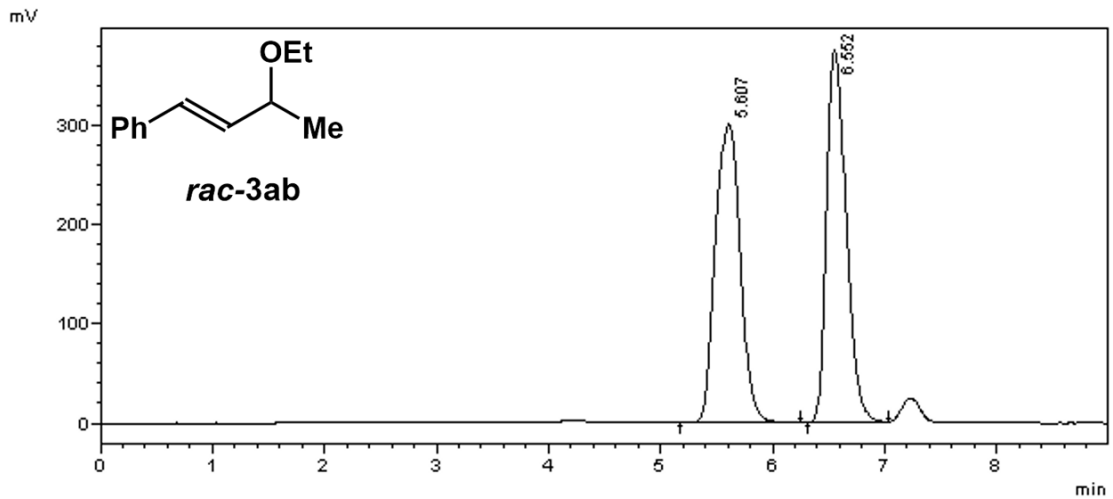

峰表

| 峰# | 保留时间  | 面积      | 高度     | 面积 %   |
|----|-------|---------|--------|--------|
| 1  | 5.607 | 4676002 | 300572 | 50.372 |
| 2  | 6.552 | 4607002 | 374846 | 49.628 |

Translation of Chinese characters to English:

| Peak | Retention time | Area    | Height | Area % |
|------|----------------|---------|--------|--------|
| 1    | 5.607          | 4676002 | 300572 | 50.372 |
| 2    | 6.552          | 4607002 | 374846 | 49.628 |

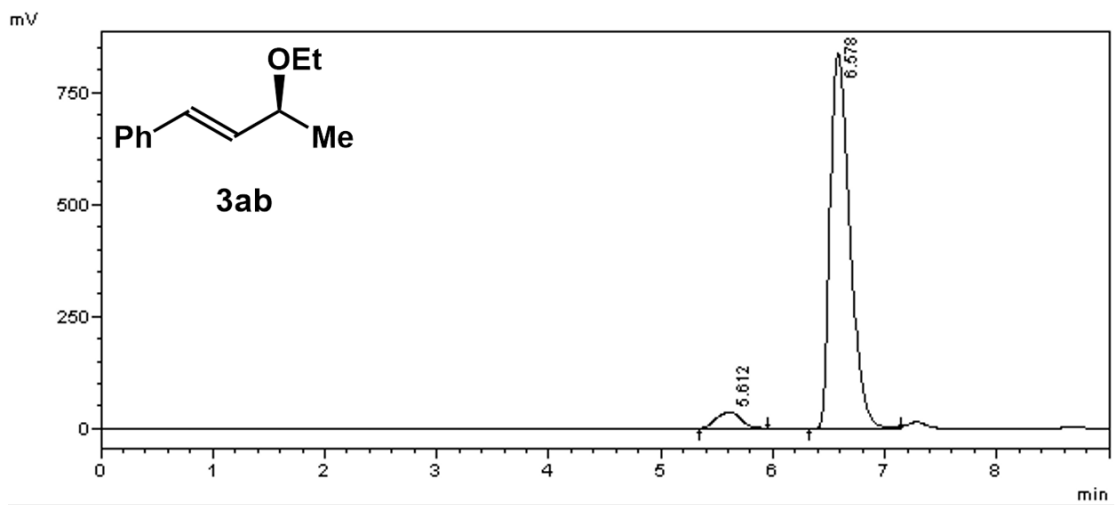

峰表

| 峰# | 保留时间  | 面积       | 高度     | 面积 %   |
|----|-------|----------|--------|--------|
| 1  | 5.612 | 555403   | 35720  | 5.144  |
| 2  | 6.578 | 10242003 | 837491 | 94.856 |

Translation of Chinese characters to English:

| Peak | Retention time | Area     | Height | Area % |
|------|----------------|----------|--------|--------|
| 1    | 5.612          | 555403   | 35720  | 5.144  |
| 2    | 6.578          | 10242003 | 837491 | 94.856 |

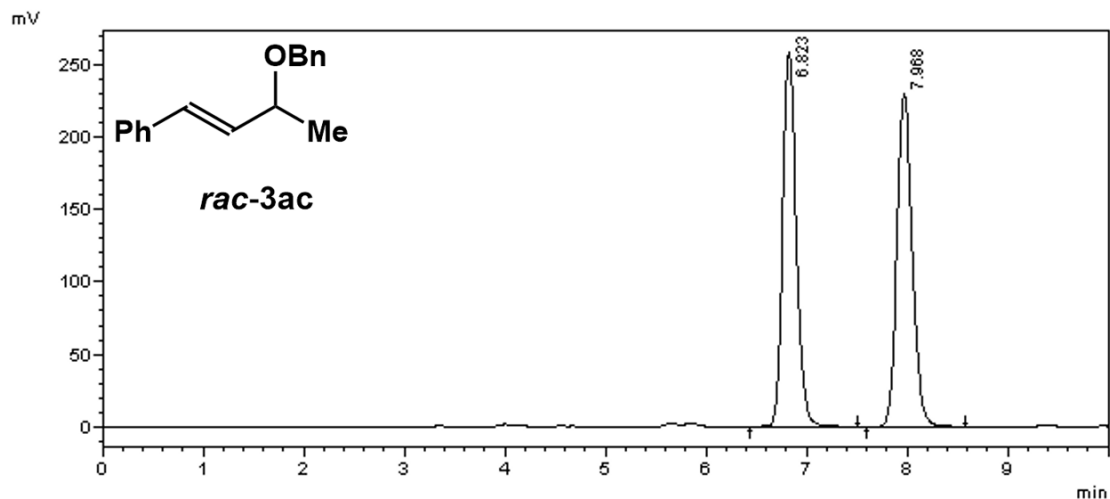

峰表

| 峰# | 保留时间  | 面积      | 高度     | 面积 %   |
|----|-------|---------|--------|--------|
| 1  | 6.823 | 2433660 | 258091 | 50.083 |
| 2  | 7.968 | 2425594 | 229293 | 49.917 |

Translation of Chinese characters to English:

| Peak | Retention time | Area    | Height | Area % |
|------|----------------|---------|--------|--------|
| 1    | 6.823          | 2433660 | 258091 | 50.083 |
| 2    | 7.968          | 2425594 | 229293 | 49.917 |

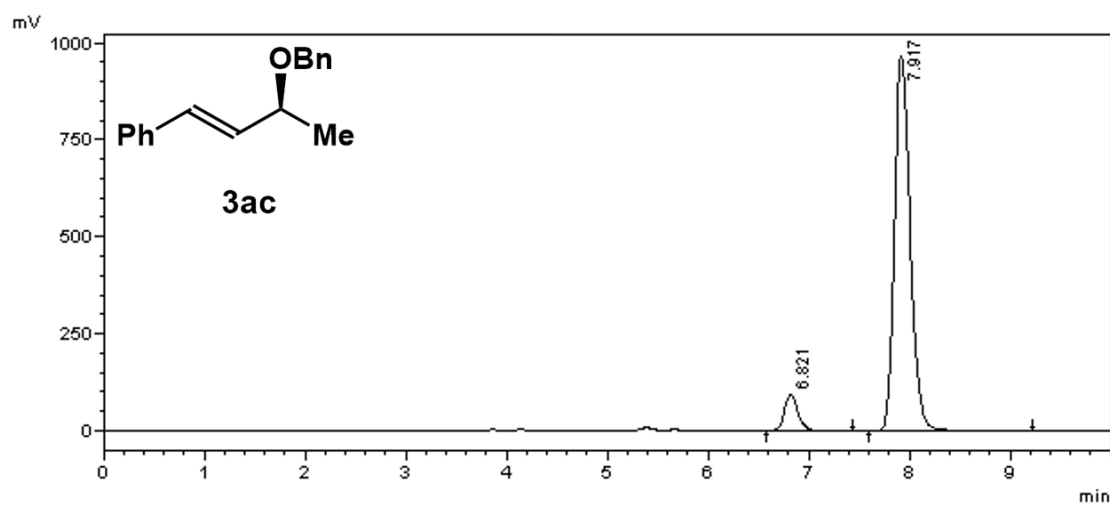

峰表

| 峰# | 保留时间  | 面积       | 高度     | 面积 %   |
|----|-------|----------|--------|--------|
| 1  | 6.821 | 863101   | 92478  | 7.637  |
| 2  | 7.917 | 10437828 | 964916 | 92.363 |

Translation of Chinese characters to English:

| Peak | Retention time | Area     | Height | Area % |
|------|----------------|----------|--------|--------|
| 1    | 6.821          | 863101   | 92478  | 7.637  |
| 2    | 7.917          | 10437828 | 964916 | 92.363 |

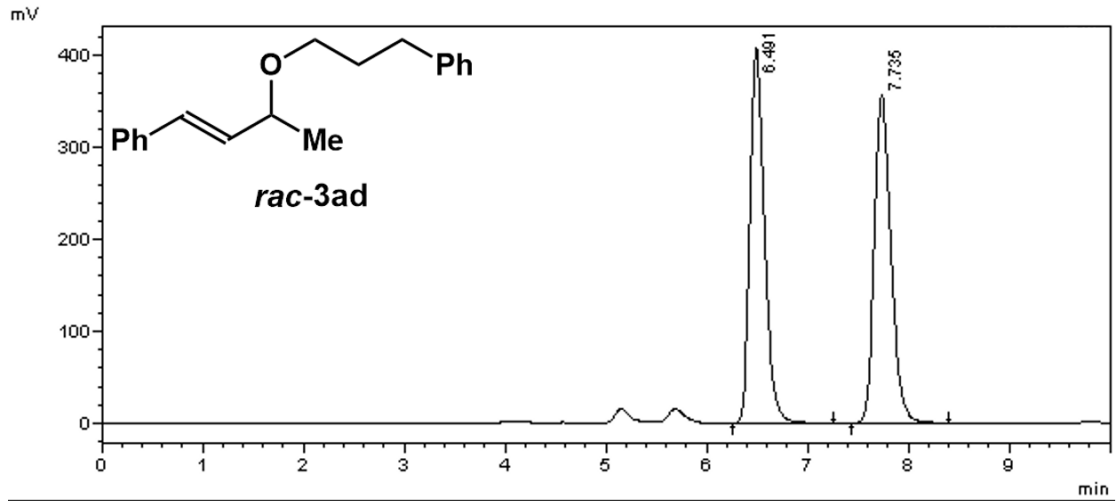

峰表

| 峰# | 保留时间  | 面积      | 高度     | 面积 %   |
|----|-------|---------|--------|--------|
| 1  | 6.491 | 4106887 | 408283 | 49.996 |
| 2  | 7.735 | 4107480 | 356851 | 50.004 |

Translation of Chinese characters to English:

| Peak | Retention time | Area    | Height | Area % |
|------|----------------|---------|--------|--------|
| 1    | 6.491          | 4106887 | 408283 | 49.996 |
| 2    | 7.735          | 4107480 | 356851 | 50.004 |

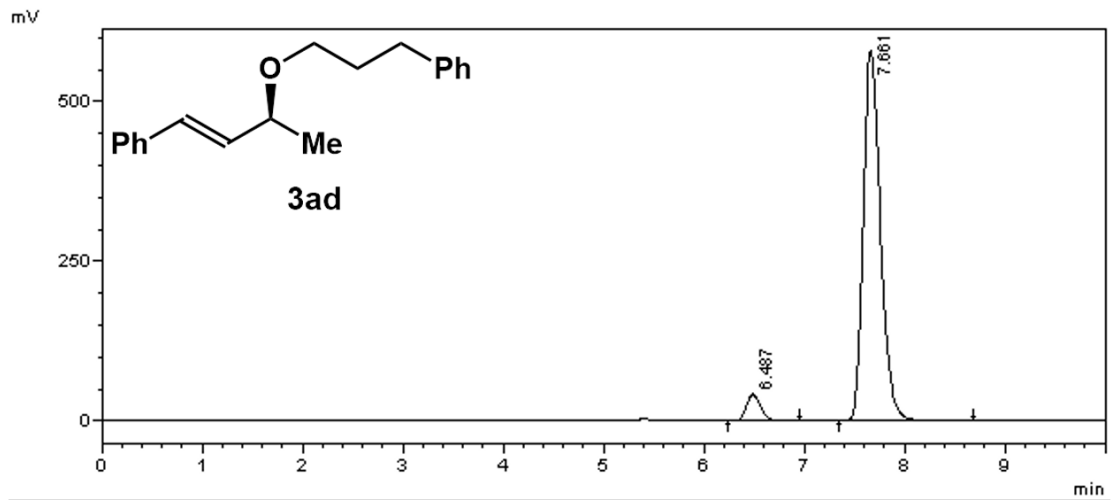

峰表

| 峰# | 保留时间  | 面积      | 高度     | 面积 %   |
|----|-------|---------|--------|--------|
| 1  | 6.487 | 412972  | 41759  | 5.636  |
| 2  | 7.661 | 6914198 | 579719 | 94.364 |

Translation of Chinese characters to English:

| Peak | Retention time | Area    | Height | Area % |
|------|----------------|---------|--------|--------|
| 1    | 6.487          | 412972  | 41759  | 5.636  |
| 2    | 7.661          | 6914198 | 579719 | 94.364 |

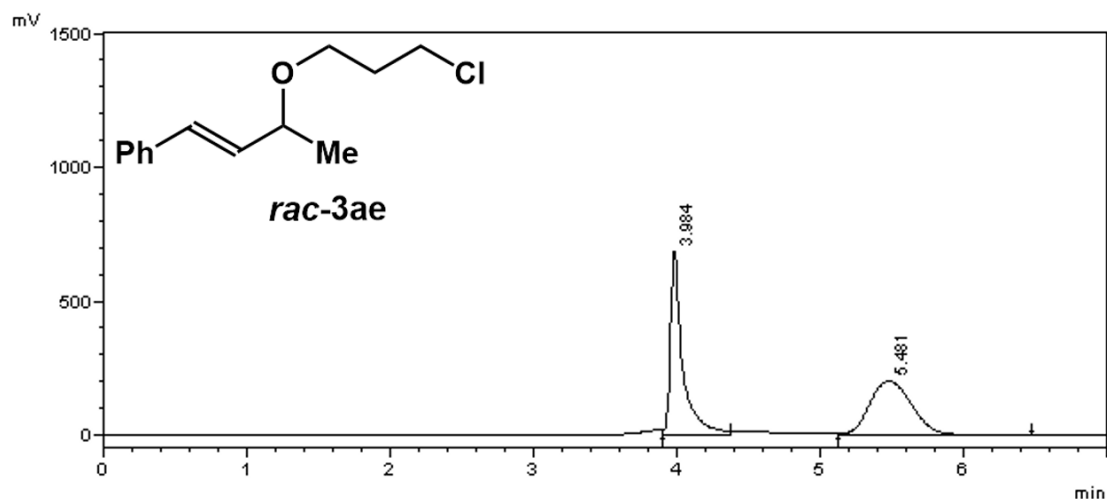

峰表

| 峰# | 保留时间  | 面积      | 高度     | 面积 %   |
|----|-------|---------|--------|--------|
| 1  | 3.984 | 4117332 | 683702 | 50.098 |
| 2  | 5.481 | 4101230 | 200694 | 49.902 |

Translation of Chinese characters to English:

| Peak | Retention time | Area    | Height | Area % |
|------|----------------|---------|--------|--------|
| 1    | 3.984          | 4117332 | 683702 | 50.098 |
| 2    | 5.481          | 4101230 | 200694 | 49.902 |

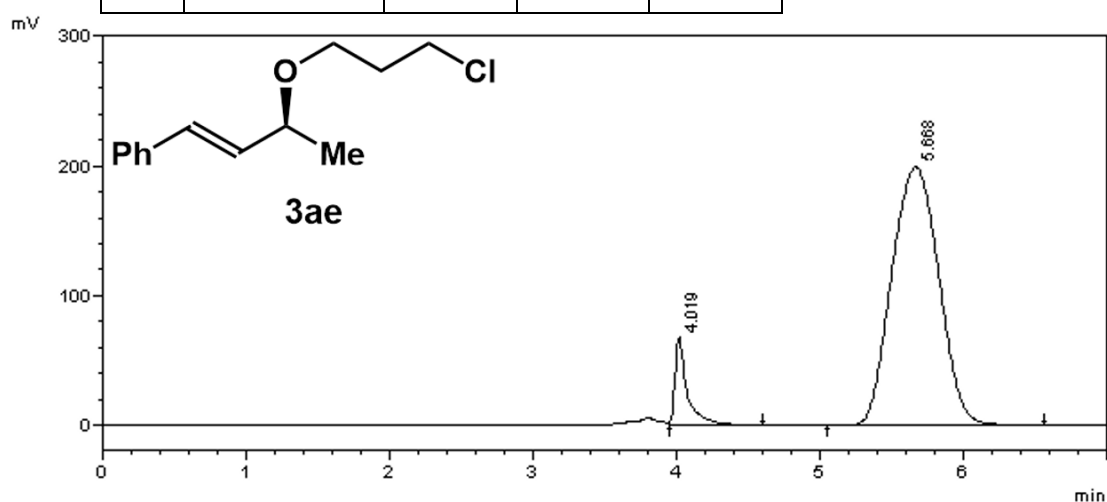

峰表

| 峰# | 保留时间  | 面积      | 高度     | 面积 %   |
|----|-------|---------|--------|--------|
| 1  | 4.019 | 405981  | 68164  | 8.231  |
| 2  | 5.668 | 4526268 | 198950 | 91.769 |

Translation of Chinese characters to English:

| Peak | Retention time | Area    | Height | Area % |
|------|----------------|---------|--------|--------|
| 1    | 4.019          | 405981  | 68164  | 8.231  |
| 2    | 5.668          | 4526268 | 198950 | 91.769 |

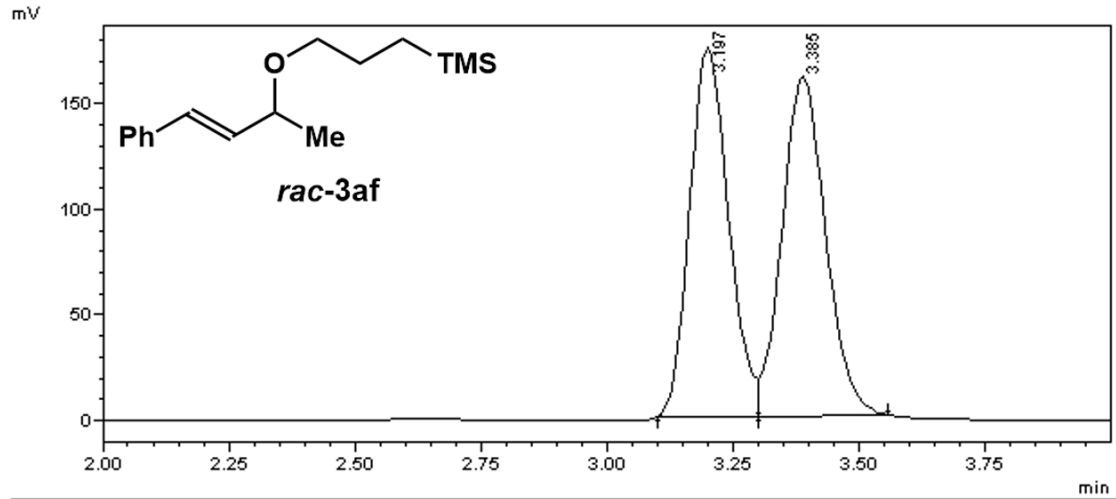

峰表

| 峰# | 保留时间  | 面积     | 高度     | 面积 %   |
|----|-------|--------|--------|--------|
| 1  | 3.197 | 946509 | 175278 | 49.531 |
| 2  | 3.385 | 964446 | 160650 | 50.469 |

Translation of Chinese characters to English:

| Peak | Retention time | Area   | Height | Area % |
|------|----------------|--------|--------|--------|
| 1    | 3.197          | 946509 | 175278 | 49.531 |
| 2    | 3.385          | 964446 | 160650 | 50.469 |

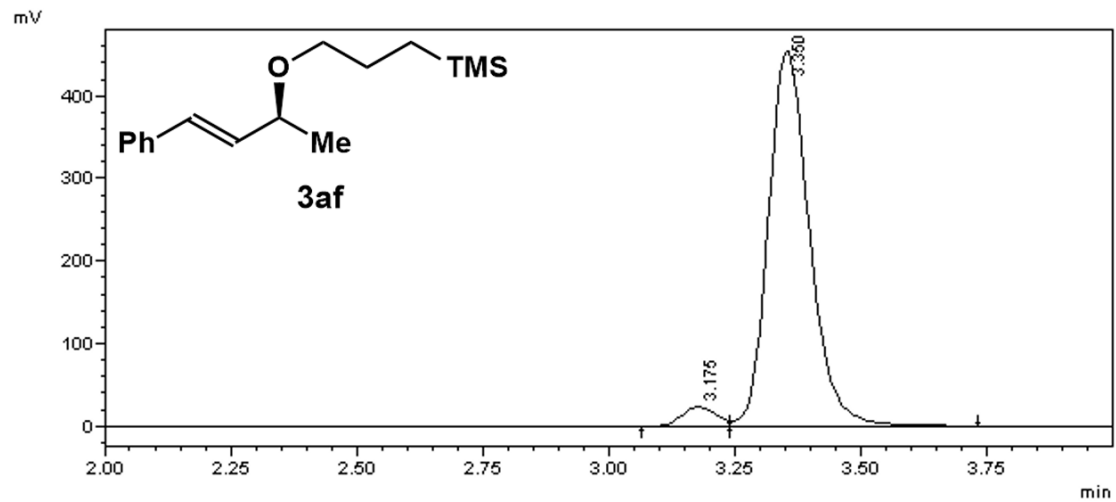

峰表

| 峰# | 保留时间  | 面积      | 高度     | 面积 %   |
|----|-------|---------|--------|--------|
| 1  | 3.175 | 113213  | 23482  | 4.205  |
| 2  | 3.350 | 2578891 | 453904 | 95.795 |

Translation of Chinese characters to English:

| Peak | Retention time | Area    | Height | Area % |
|------|----------------|---------|--------|--------|
| 1    | 3.175          | 113213  | 23482  | 4.205  |
| 2    | 3.350          | 2578891 | 453904 | 95.795 |

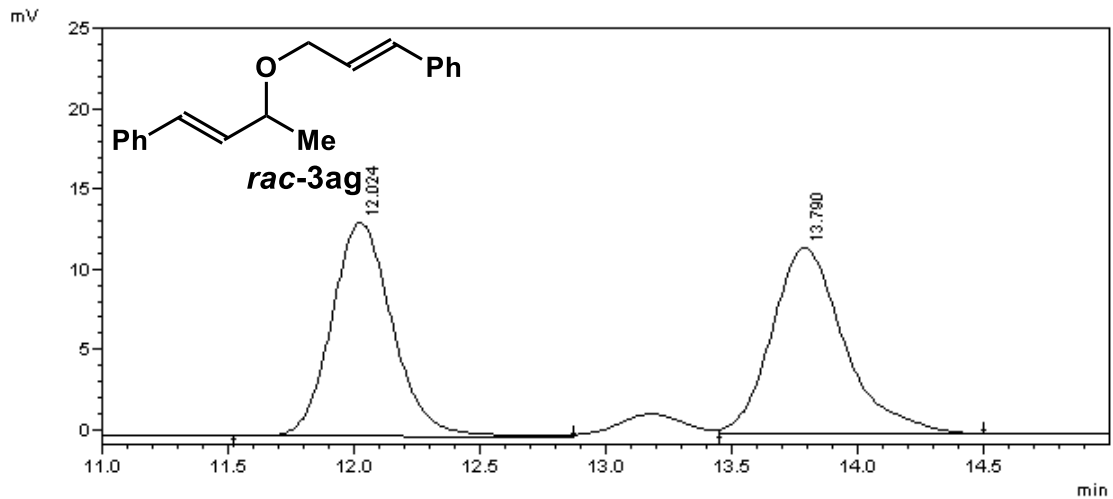

峰表

| 峰# | 保留时间   | 面积     | 高度    | 面积 %   |
|----|--------|--------|-------|--------|
| 1  | 12.024 | 225111 | 13379 | 49.146 |
| 2  | 13.790 | 232932 | 11609 | 50.854 |

Translation of Chinese characters to English:

| Peak | Retention time | Area   | Height | Area % |
|------|----------------|--------|--------|--------|
| 1    | 12.024         | 225111 | 13379  | 49.146 |
| 2    | 13.790         | 232932 | 11609  | 50.854 |

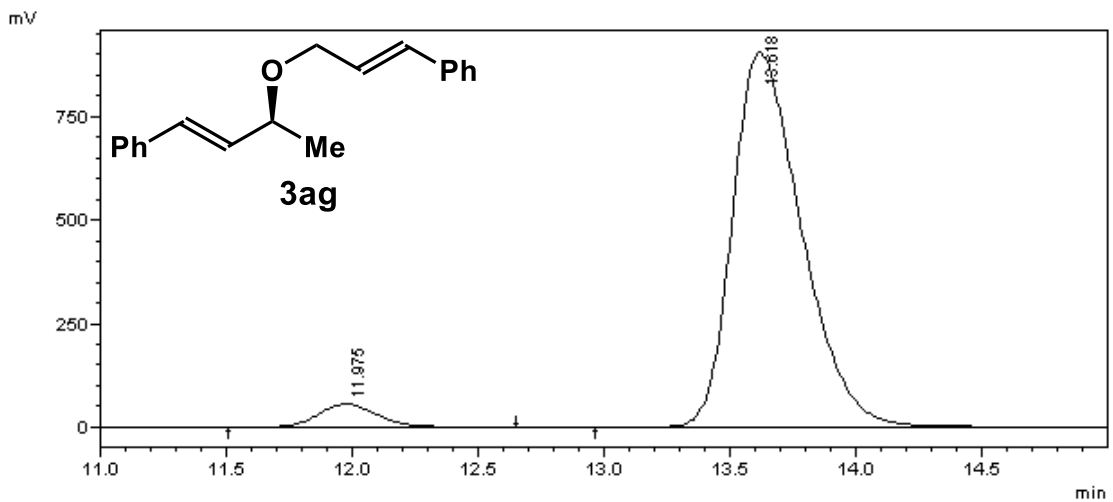

峰表

| 峰# | 保留时间   | 面积       | 高度     | 面积 %   |
|----|--------|----------|--------|--------|
| 1  | 11.975 | 905593   | 55633  | 4.975  |
| 2  | 13.618 | 17298438 | 905621 | 95.025 |

Translation of Chinese characters to English:

| Peak | Retention time | Area     | Height | Area % |
|------|----------------|----------|--------|--------|
| 1    | 11.975         | 905593   | 55633  | 4.975  |
| 2    | 13.618         | 17298438 | 905621 | 95.025 |



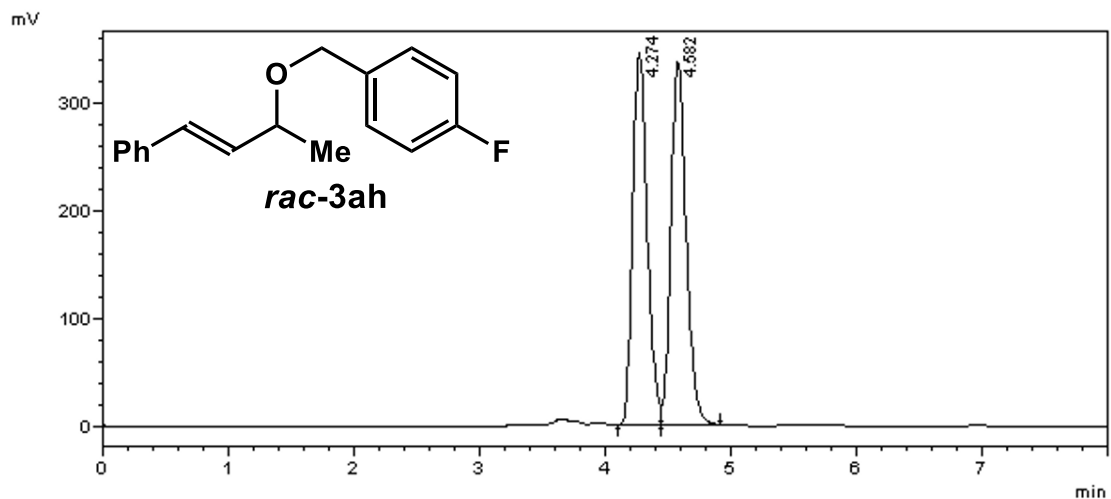

峰表

| 峰# | 保留时间  | 面积      | 高度     | 面积 %   |
|----|-------|---------|--------|--------|
| 1  | 4.274 | 2798667 | 345630 | 49.488 |
| 2  | 4.582 | 2856609 | 337114 | 50.512 |

Translation of Chinese characters to English:

| Peak | Retention time | Area    | Height | Area % |
|------|----------------|---------|--------|--------|
| 1    | 4.274          | 2798667 | 345630 | 49.488 |
| 2    | 4.582          | 2856609 | 337114 | 50.512 |

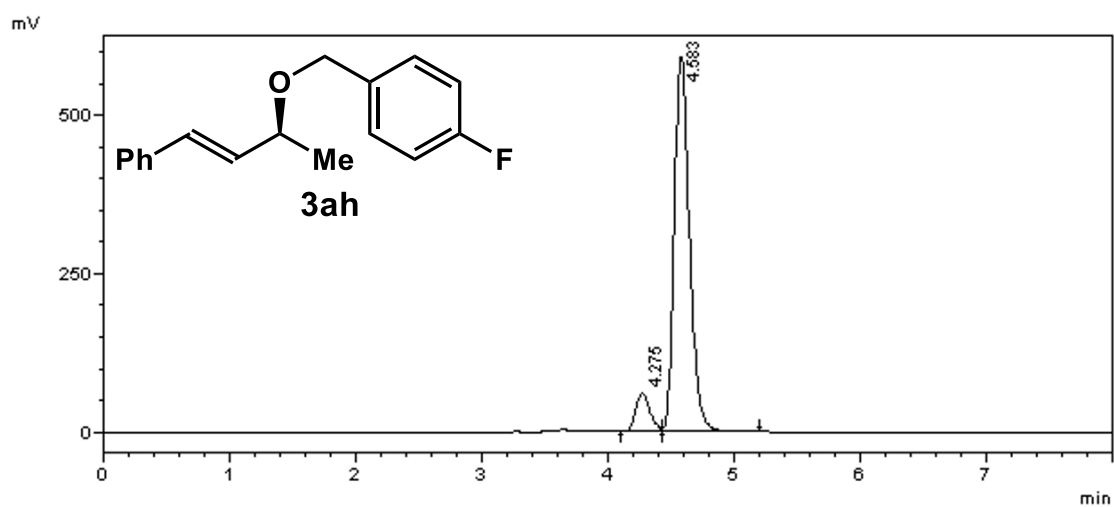

峰表

| 峰# | 保留时间  | 面积      | 高度     | 面积 %   |
|----|-------|---------|--------|--------|
| 1  | 4.275 | 481397  | 60121  | 8.796  |
| 2  | 4.583 | 4991515 | 591950 | 91.204 |

Translation of Chinese characters to English:

| Peak | Retention time | Area    | Height | Area % |
|------|----------------|---------|--------|--------|
| 1    | 4.275          | 481397  | 60121  | 8.796  |
| 2    | 4.583          | 4991515 | 591950 | 91.204 |

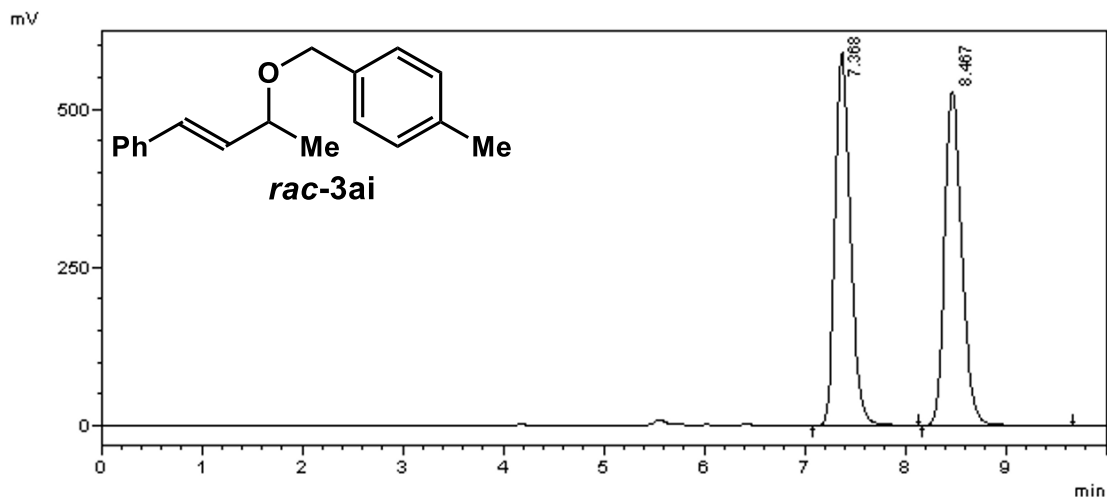

峰表

| 峰# | 保留时间  | 面积      | 高度     | 面积 %   |
|----|-------|---------|--------|--------|
| 1  | 7.368 | 6282289 | 589147 | 50.019 |
| 2  | 8.467 | 6277598 | 527205 | 49.981 |

Translation of Chinese characters to English:

| Peak | Retention time | Area    | Height | Area % |
|------|----------------|---------|--------|--------|
| 1    | 7.368          | 6282289 | 589147 | 50.019 |
| 2    | 8.467          | 6277598 | 527205 | 49.981 |

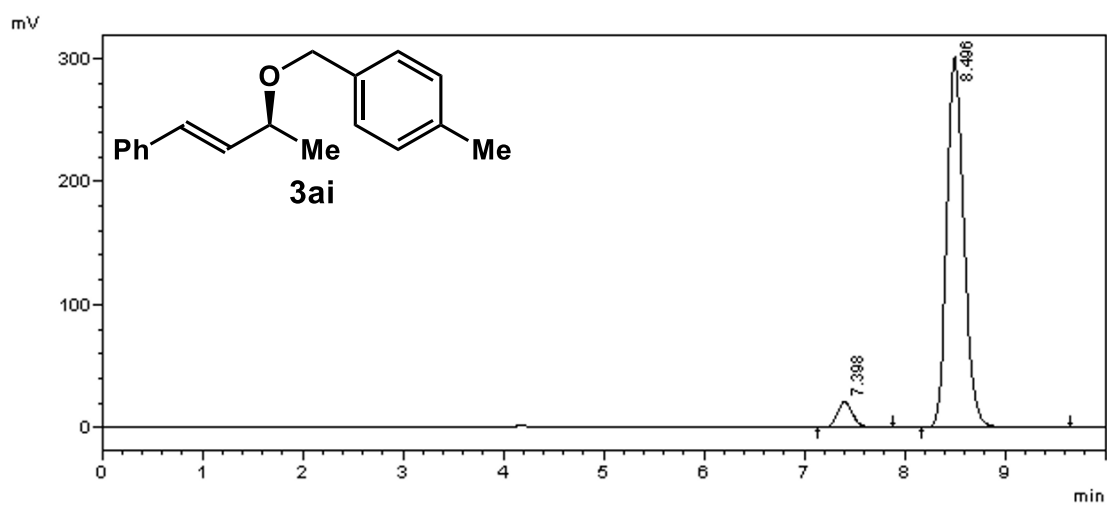

峰表

| 峰# | 保留时间  | 面积      | 高度     | 面积 %   |
|----|-------|---------|--------|--------|
| 1  | 7.398 | 225804  | 21101  | 5.931  |
| 2  | 8.496 | 3581684 | 301132 | 94.069 |

Translation of Chinese characters to English:

| Peak | Retention time | Area    | Height | Area % |
|------|----------------|---------|--------|--------|
| 1    | 7.398          | 225804  | 21101  | 5.931  |
| 2    | 8.496          | 3581684 | 301132 | 94.069 |

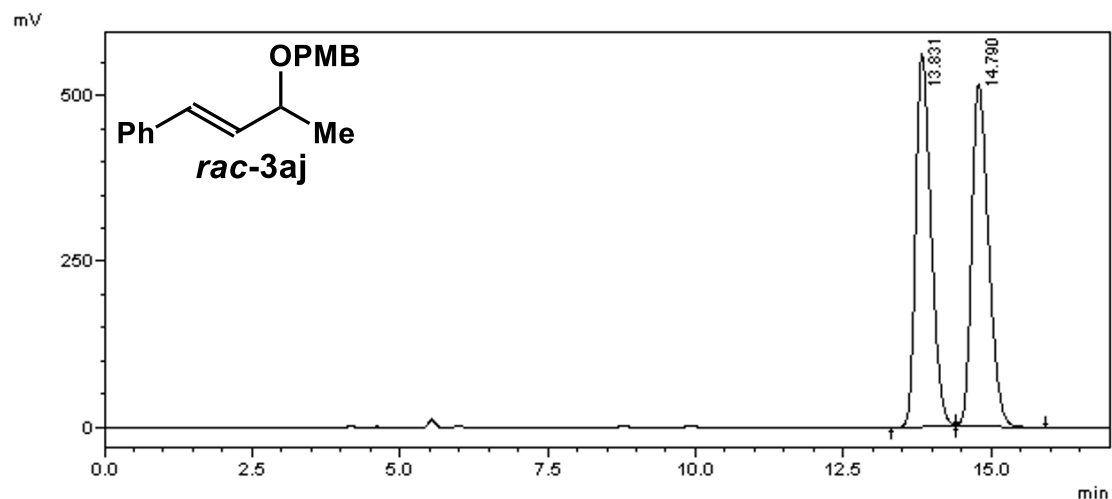

峰表

| 峰# | 保留时间   | 面积       | 高度     | 面积 %   |
|----|--------|----------|--------|--------|
| 1  | 13.831 | 10088376 | 560354 | 49.999 |
| 2  | 14.790 | 10088632 | 513245 | 50.001 |

Translation of Chinese characters to English:

| Peak | Retention time | Area     | Height | Area % |
|------|----------------|----------|--------|--------|
| 1    | 13.831         | 10088376 | 560354 | 49.999 |
| 2    | 14.790         | 10088672 | 513245 | 50.001 |

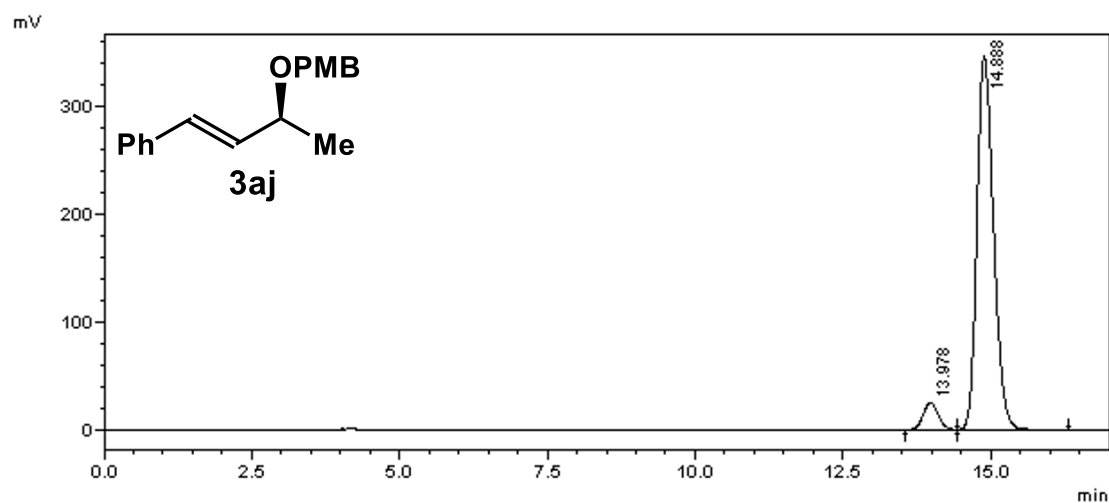

峰表

| 峰# | 保留时间   | 面积      | 高度     | 面积 %   |
|----|--------|---------|--------|--------|
| 1  | 13.978 | 443909  | 25031  | 6.167  |
| 2  | 14.888 | 6754301 | 346898 | 93.833 |

Translation of Chinese characters to English:

| Peak | Retention time | Area    | Height | Area % |
|------|----------------|---------|--------|--------|
| 1    | 13.978         | 443909  | 25031  | 6.167  |
| 2    | 14.888         | 6754301 | 346898 | 93.833 |

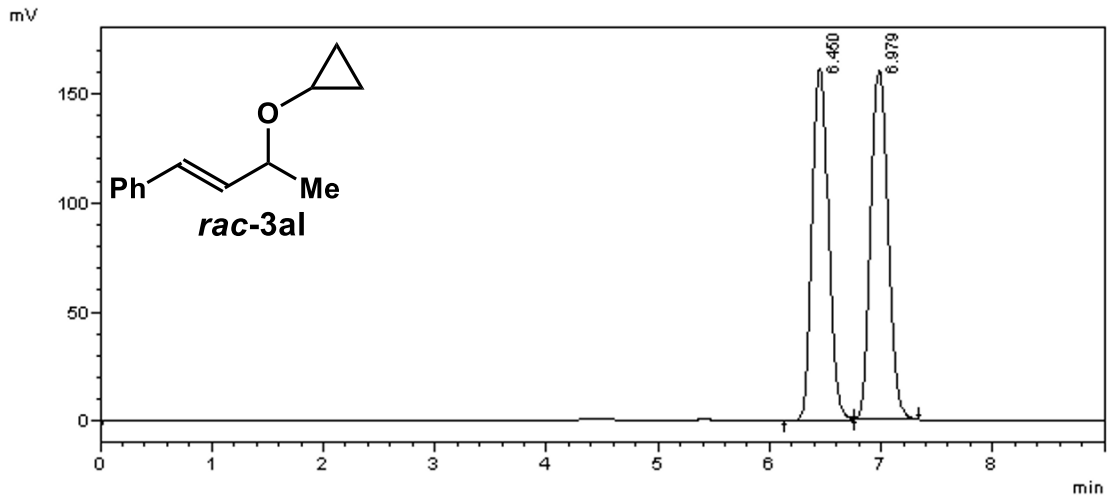

峰表

| 峰# | 保留时间  | 面积      | 高度     | 面积 %   |
|----|-------|---------|--------|--------|
| 1  | 6.450 | 1670584 | 161731 | 49.217 |
| 2  | 6.979 | 1723708 | 159624 | 50.783 |

Translation of Chinese characters to English:

| Peak | Retention time | Area    | Height | Area % |
|------|----------------|---------|--------|--------|
| 1    | 6.450          | 1670584 | 161731 | 49.217 |
| 2    | 6.979          | 1723708 | 159624 | 50.783 |

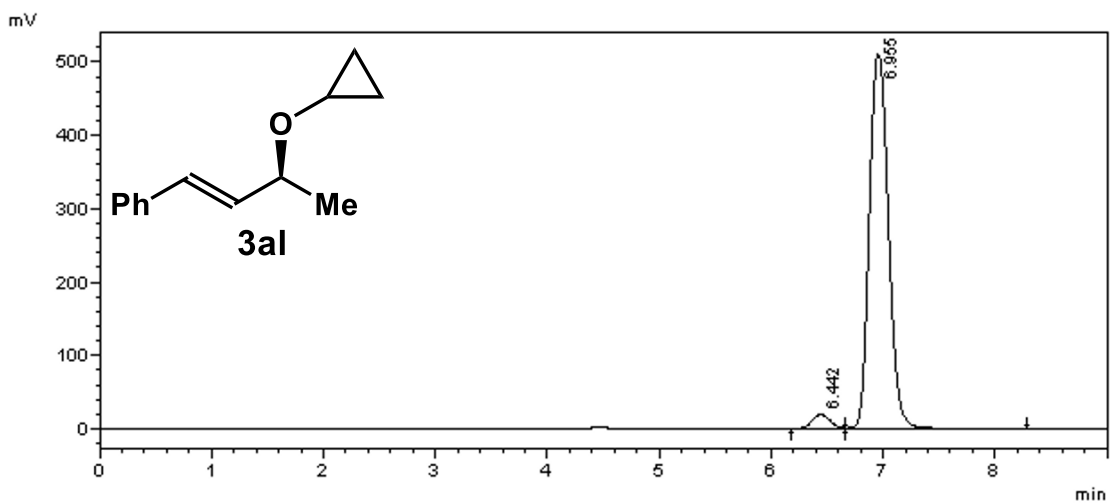

峰表

| 峰# | 保留时间  | 面积      | 高度     | 面积 %   |
|----|-------|---------|--------|--------|
| 1  | 6.442 | 213582  | 18806  | 3.430  |
| 2  | 6.955 | 6013512 | 510793 | 96.570 |

Translation of Chinese characters to English:

| Peak | Retention time | Area    | Height | Area % |
|------|----------------|---------|--------|--------|
| 1    | 6.442          | 213582  | 18806  | 3.430  |
| 2    | 6.955          | 6013512 | 510793 | 96.570 |

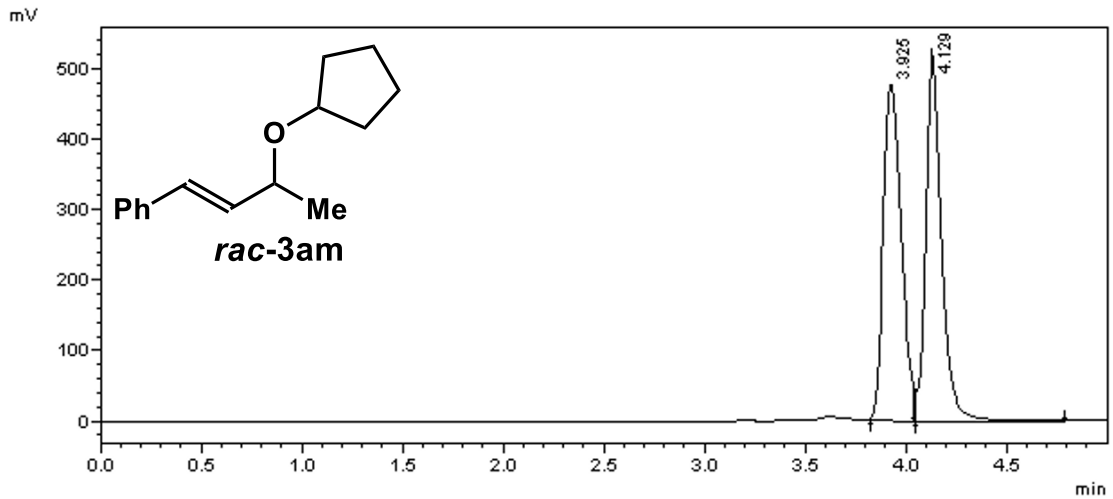

峰表

| 峰# | 保留时间  | 面积      | 高度     | 面积 %   |
|----|-------|---------|--------|--------|
| 1  | 3.925 | 2936891 | 477226 | 50.274 |
| 2  | 4.129 | 2904933 | 527581 | 49.726 |

Translation of Chinese characters to English:

| Peak | Retention time | Area    | Height | Area % |
|------|----------------|---------|--------|--------|
| 1    | 3.925          | 2936891 | 477226 | 50.274 |
| 2    | 4.129          | 2904933 | 527581 | 49.726 |

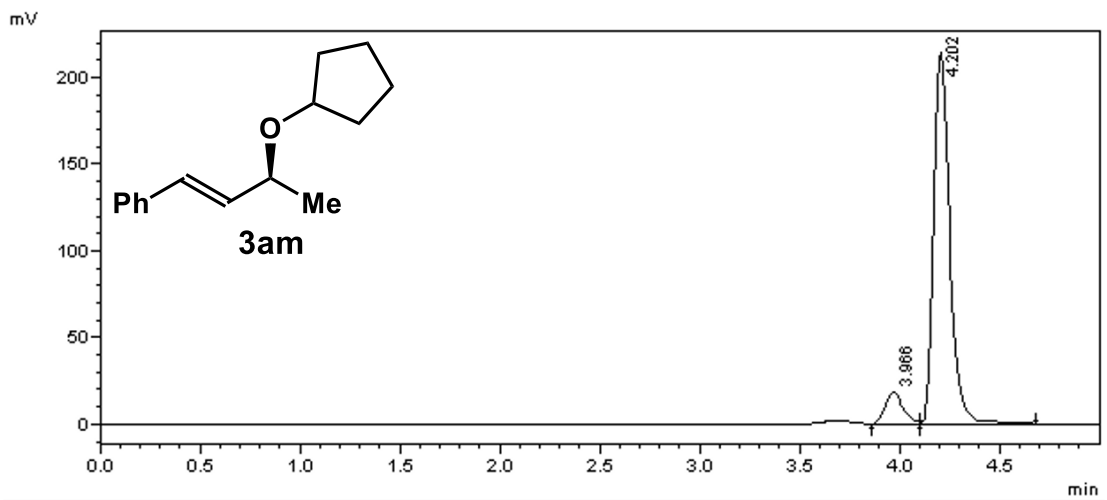

峰表

| 峰# | 保留时间  | 面积      | 高度     | 面积 %   |
|----|-------|---------|--------|--------|
| 1  | 3.966 | 109192  | 17678  | 8.525  |
| 2  | 4.202 | 1171682 | 214010 | 91.475 |

Translation of Chinese characters to English:

| Peak | Retention time | Area    | Height | Area % |
|------|----------------|---------|--------|--------|
| 1    | 3.966          | 109192  | 17678  | 8.525  |
| 2    | 4.202          | 1171682 | 214010 | 91.475 |
